# Supplementary material for: Annulated bacteriochlorins for near-infrared photophysical studies
Source: Royal Society of Chemistry journal article supplement (doi:10.1039/c9nj01113g), 2019-01-01

Electronic Supplementary Information for:  
**Annulated Bacteriochlorins for Near-Infrared Photophysical Studies**

Hikaru Fujita,<sup>a</sup> Haoyu Jing,<sup>a</sup> Michael Kraye,<sup>a</sup> Srinivasarao Allu,<sup>a</sup> Gorre Veeraraghavaiah,<sup>a</sup>  
Zhiyuan Wu,<sup>a</sup> Jianbing Jiang,<sup>a</sup> James R. Diers,<sup>b</sup> Nikki Cecil M. Magdaong,<sup>c</sup> Amit K. Mandal,<sup>c</sup>  
Arpita Roy,<sup>c</sup> Dariusz M. Niedzwiedzki,<sup>d</sup> Christine Kirmaier,<sup>c</sup>  
David F. Bocian,<sup>b,\*</sup> Dewey Holten<sup>c,\*</sup> and Jonathan S. Lindsey<sup>a,\*</sup>

<sup>a</sup>Department of Chemistry, North Carolina State University, Raleigh, North Carolina 27695-8204

<sup>b</sup>Department of Chemistry, University of California, Riverside, California 92521-0403

<sup>c</sup>Department of Chemistry, Washington University, St. Louis, Missouri, 63130-4889

<sup>d</sup>Department of Energy, Environmental & Chemical Engineering and Center for Solar Energy and Energy Storage, Washington University, St. Louis, Missouri 63130-4889

**Table of contents**

| Topic                                                                                        | Page |
|----------------------------------------------------------------------------------------------|------|
| 1. Synthetic studies toward $\beta,\beta$ -annulated bacteriochlorins .....                  | S1   |
| 2. X-Ray structure of <b>18</b> .....                                                        | S13  |
| 3. Attempted oxidative annulations .....                                                     | S14  |
| 4. X-Ray structure of <b>21</b> .....                                                        | S16  |
| 5. Attempted Pd-coupling reactions.....                                                      | S17  |
| 6. X-Ray structure of <b>24</b> .....                                                        | S18  |
| 7. Screening of reaction conditions for self-condensation of dihydrodipyrrin <b>25</b> ..... | S19  |
| 8. Photophysical data for bacteriochlorin <b>BC-2</b> .....                                  | S20  |
| 9. Results of TDDFT calculations .....                                                       | S22  |
| 10. References.....                                                                          | S24  |
| 11. Spectral data .....                                                                      | S25  |

**1. Synthetic studies toward  $\beta,\beta$ -annulated bacteriochlorins**

Several general approaches to  $\beta,\beta$ -annulated bacteriochlorins are outlined in Chart S1 and developed further in the following text and diagrams.

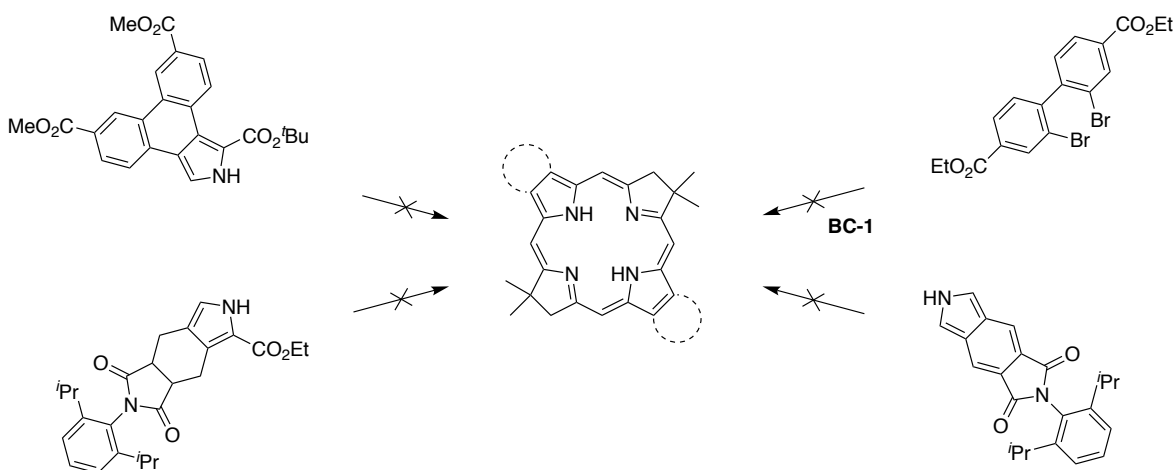

**Chart S1.** Summary of attempted syntheses toward  $\beta,\beta$ -annulated bacteriochlorins bearing electron-withdrawing groups.

Inspired by the success of the synthesis of phenanthrene-annulated porphyrins,<sup>68</sup> we first pursued the synthesis of phenanthrene-annulated bacteriochlorins as outlined in Scheme S1.

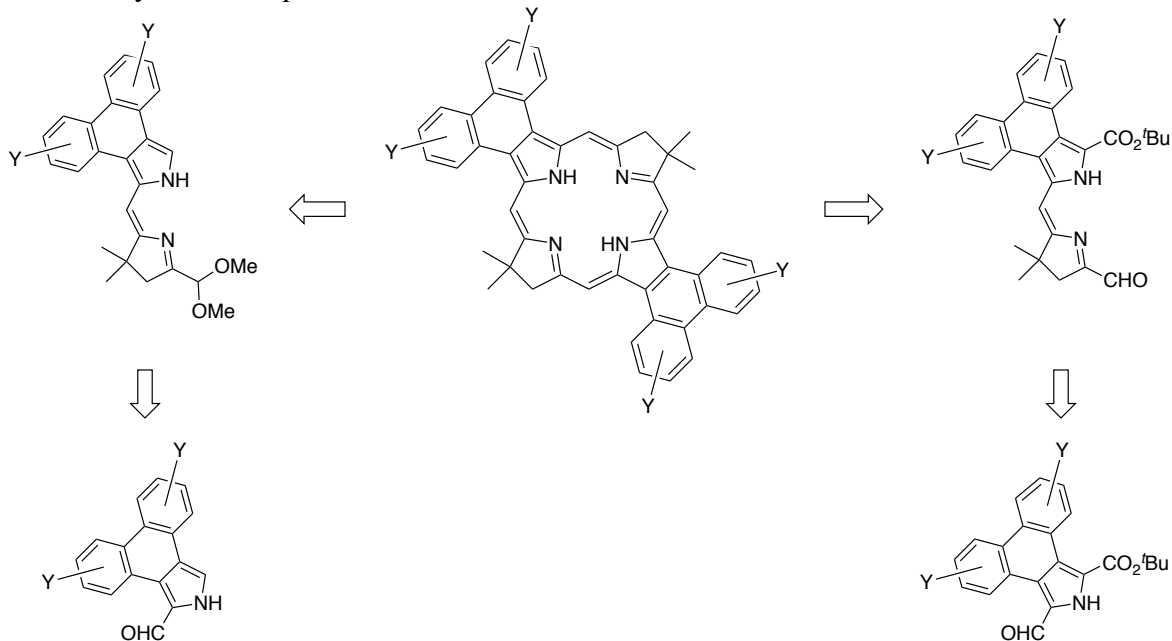

**Scheme S1.** Retrosynthetic analysis of a phenanthrene-annulated bacteriochlorin starting from a phenanthrene-annulated pyrrole (Y = H, COR).

During our trials concerning the synthesis of  $\beta,\beta$ -phenanthrene-annulated bacteriochlorins, we found that electron-withdrawing groups, such as ester groups, were crucial to stabilize the target bacteriochlorin; the presence of ester groups was also considered a potential means to improve the solubility. Various attempts were explored towards the synthesis of tetraester-substituted dibenzannulated bacteriochlorins from a tetrabromo-bacteriochlorin (Scheme S2), but these turned out to be unsuccessful. Generally speaking, several different types of coupling reaction are known to work well on the tetrabromo-bacteriochlorin, but the stability of bacteriochlorins and/or products derived therefrom became a critical limitation for ring-closure processes.

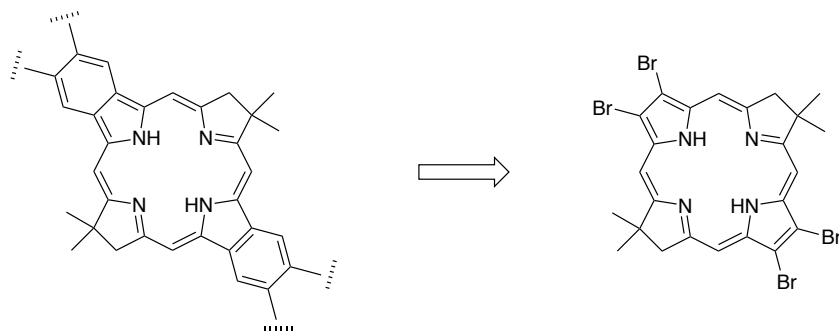

**Scheme S2.** Retrosynthetic analysis of a benzannulated bacteriochlorin starting from a tetrabromobacteriochlorin.

We tried to simplify the annulated aromatic structure from phenanthrene to a single benzene ring. Two possible routes were taken into consideration (Scheme S3). An imide was introduced to improve the stability and solubility. The first route started from an imide-substituted isoindole, which was not sufficiently stable for further coupling reactions. The

second route started from a pyrrole annulated with a cyclohexane ring following the synthesis of tetraalkylbacteriochlorins<sup>44</sup> with the aim to finish the aromatization at the last stage. This route failed at the beginning, however, owing to incompatible reaction conditions leading to the precursor dihydrodipyrrin.

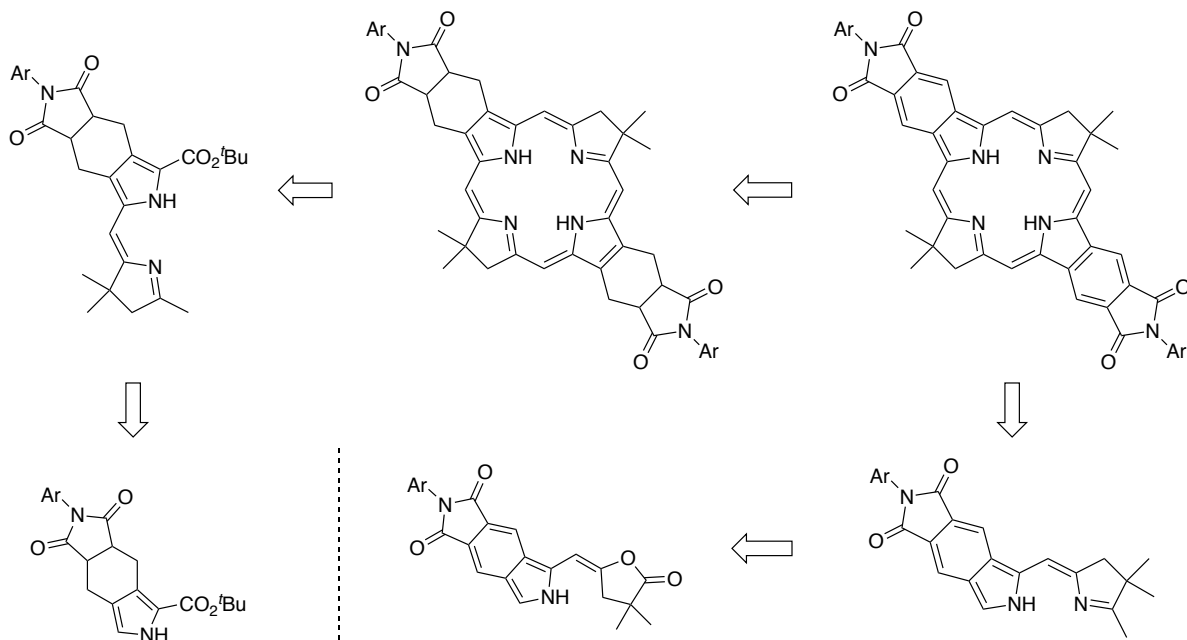

**Scheme S3.** Retrosynthetic analysis of a dibenzo-annulated bacteriochlorin, starting from an isoindole or tetrahydroisoindole.

Altogether, we attempted to gain access to compounds **S-I** – **S-VII**. These various routes are outlined below and are accompanied by synthetic procedures and characterization data in the Experimental Section.

The phenanthrene-annulated dihydrodipyrrin **S-I** was perhaps the simplest target. Reaction of **S1**<sup>S1</sup> via the Henry reaction and reduction afforded **S2**, which upon Michael addition with Michael acceptor **11** gave **S3**, but the McMurry-like reaction leading to the dihydrodipyrrin was not successful because the target compound decomposed (Scheme S4). To our knowledge, compounds **S2** and **S3** are new.

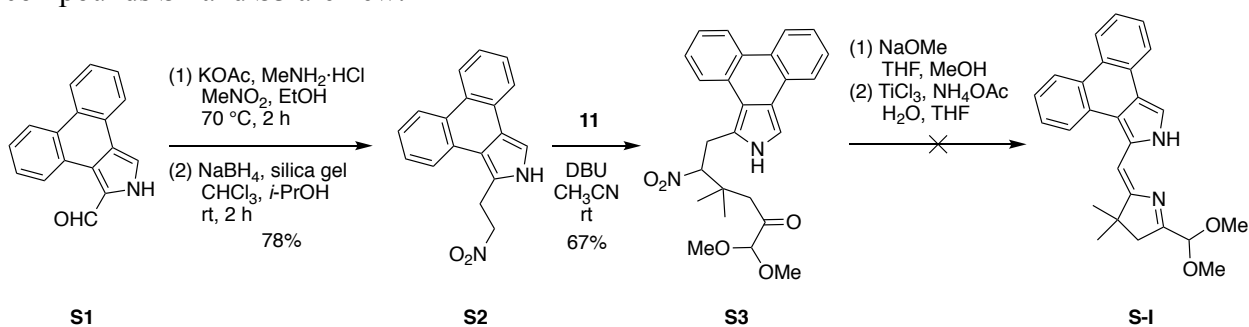

**Scheme S4.** Attempted synthesis of a phenanthrene-annulated dihydrodipyrrin–acetal (**S-I**).

A set of stannafluorenes (**S-II**) was prepared with expectations that one or more of such compounds might be used in annulation of the tetrabromobacteriochlorin. But the requirement for the solubilizing motifs appeared to thwart the synthesis, which began with commercially available biphenyldiester **S4** (Scheme S5). To our knowledge, compounds **S5–S7** are new.

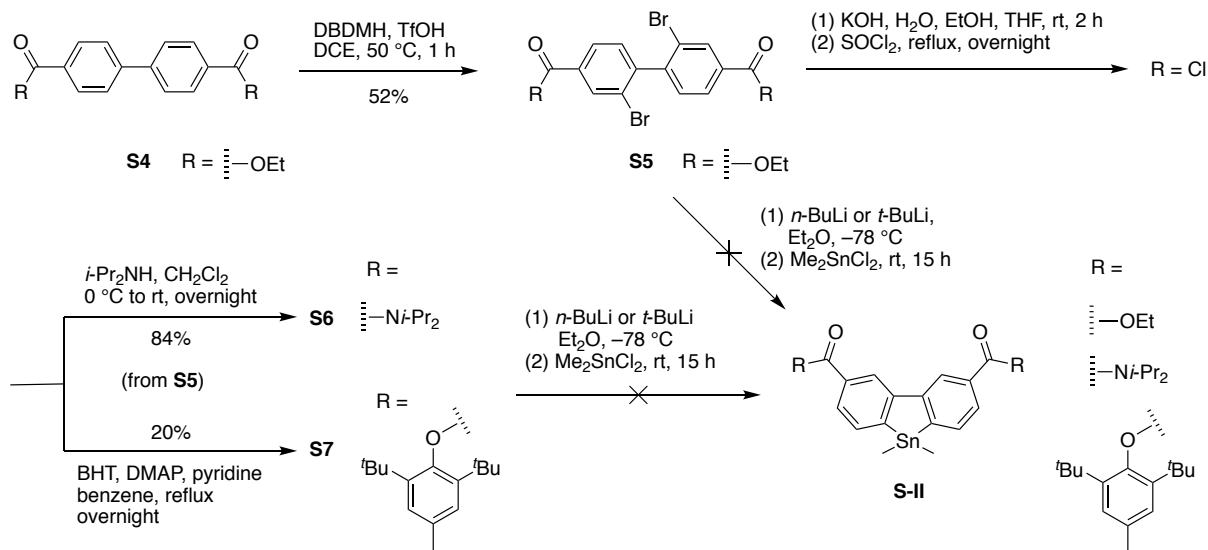

**Scheme S5.** Attempted synthesis of carbonyl-substituted stannafluorenes (**S-II**).

We next turned to the synthesis of a phenanthrene-annulated pyrrole bearing two esters on the phenanthrene unit for solubility, and one ester on the pyrrole for electronic stabilization. Such a pyrrole could then be subjected to the standard pathway for dihydrodipyrin synthesis. An early method via the intermediates **S8** and **S9** was pursued to prepare the requisite phenanthrene-diester **S10**, but the route was not successful (Scheme S6). To our knowledge, compounds **S8** and **S9** are new.

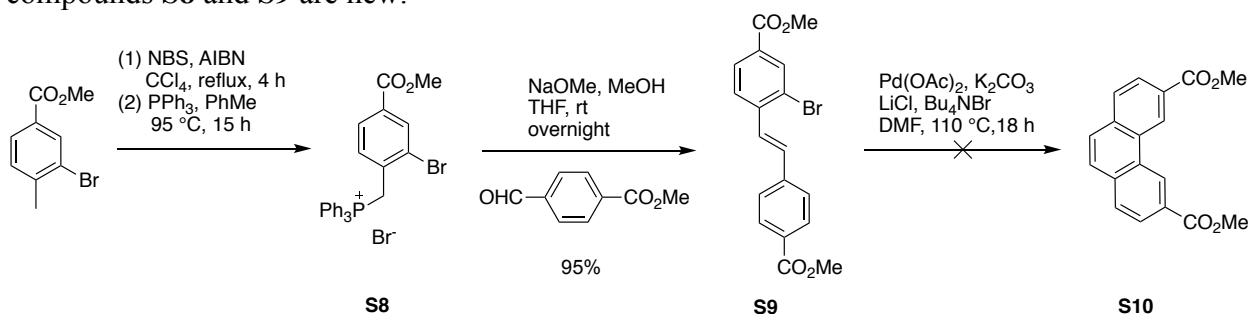

**Scheme S6.** Attempted synthesis of diester-substituted phenanthrenes.

A longer route to the phenanthrene-annulated pyrrole bearing two esters on the phenanthrene unit and one ester on the pyrrole was then pursued (Scheme S7). Known benzaldehyde **S11**<sup>S2</sup> was converted successfully, via crude **S12**, to the desired phenanthrene-diester **S10**. Subsequent elaboration successfully afforded the phenanthrene-annulated pyrrole bearing two esters on the phenanthrene unit and one ester on the pyrrole (**S14**), which was subjected to Vilsmeier formylation to give **S15**. Henry reaction and reduction were successful, yielding the 2-(2-nitroethyl)pyrrole **S16**, but Michael addition with **S16** and mesityl oxide failed, thwarting access to the target compound **S-III**, which would ultimately lead to a diester analogue of **S-I**. To our knowledge, compounds **S10** and **S12–S16** are new.

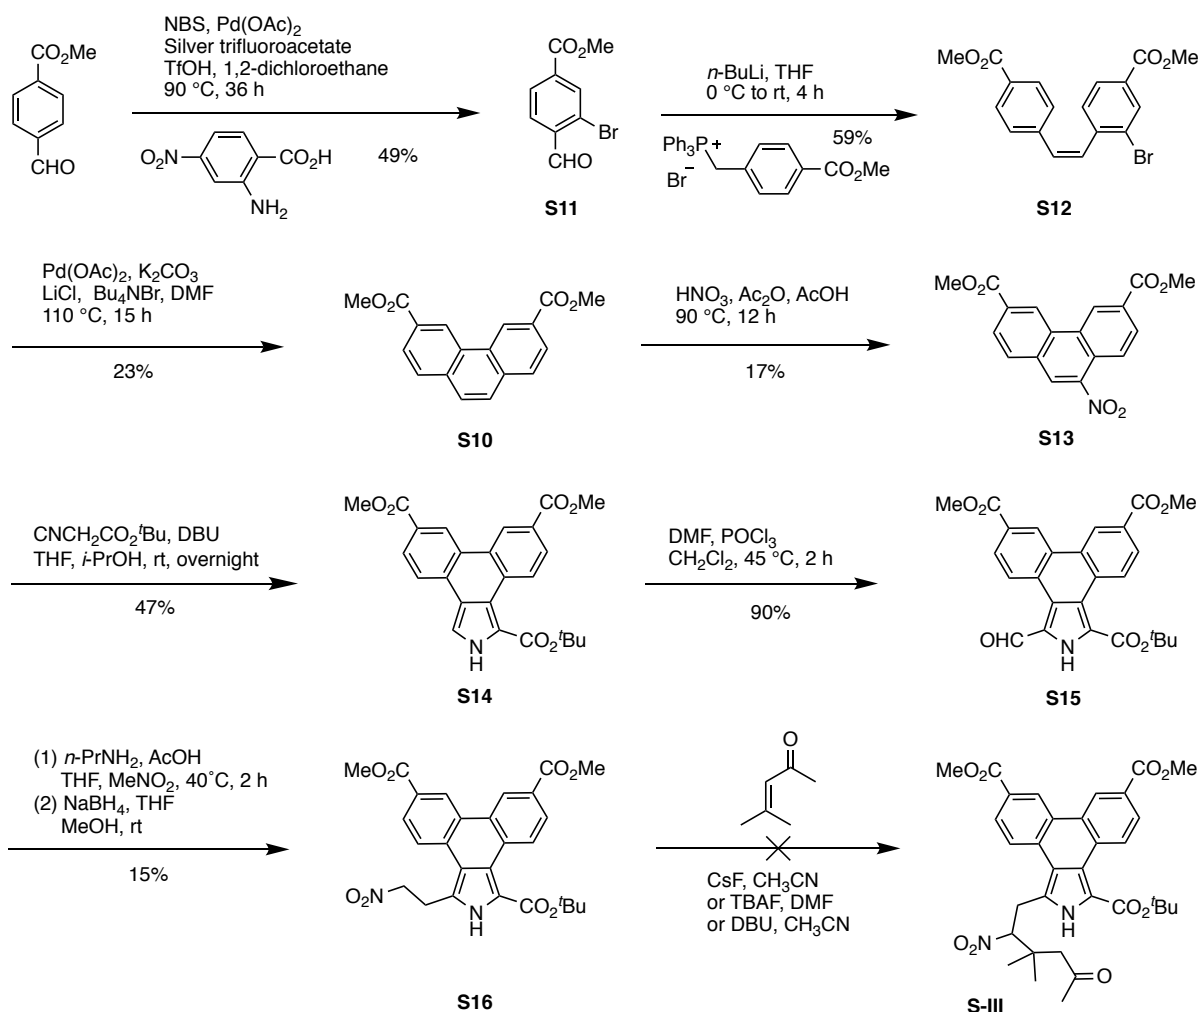

**Scheme S7.** Attempted synthesis of a diester-substituted phenanthrene-annulated pyrrole (**S-III**).

We then pursued the “Northern-Southern” route<sup>45</sup> to access a dihydrodipyrin rather than the “Eastern-Western” route<sup>42</sup> explored in Scheme S4 and Scheme S7. The Northern-Southern route requires an  $\alpha$ -halopyrrole. The phenanthrene-annulated pyrrole **S14** was brominated smoothly to give **S17** (Scheme S8). Here, attempts to couple **S17** with an alkynoic acid only gave the debrominated pyrrole **S14**, without the formation of the target pyrrole–lactone **S-IV**. Compound **S-IV**, like **S-III**, was to be an intermediate on the path to a diester analogue of **S-I**. Explanations of this failure might stem from steric hindrance of the phenanthrene ring, and/or the change in reactivity of the aromatic system due to the presence of the two ester groups. Still, this outcome is surprising, as previously we converted a *tert*-butyl 3,4-dialkylpyrrole-2-carboxylate via the Northern-Southern route to form the corresponding dihydrodipyrin.<sup>44</sup> Regardless of precedent, in both cases the routes to the diester-substituted  $\beta,\beta$ -phenanthrene-annulated dihydrodipyrin were unsuccessful. To our knowledge, compound **S17** is new.

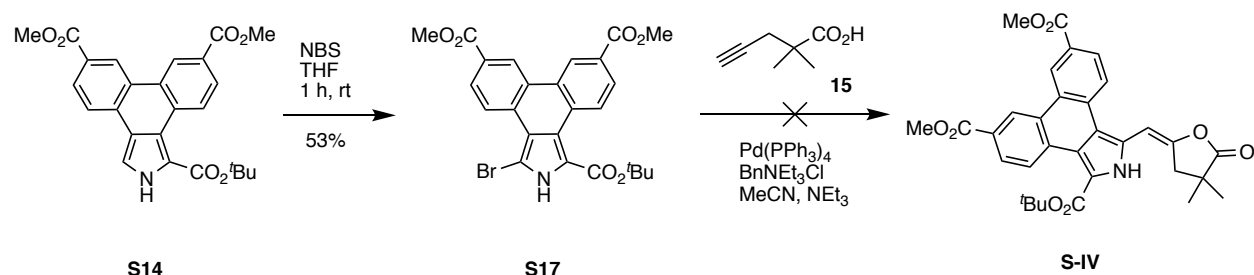

**Scheme S8.** Attempted coupling of a diester-substituted phenanthrene-annulated pyrrole and an alkynoic acid to form an annulated pyrrole–ene–lactone (**S-IV**).

At this point we reconnoitered and targeted imide-substituted benzannulated pyrroles in the dihydrodipyririn precursors to bacteriochlorins. The specific initial targets were **S-V** and **S-VI** (Scheme S9), which were to be elaborated via chemistry established as part of the Northern-Southern route into the corresponding dihydrodipyririns. Thus, reaction of *N*-tosylpyrrole-3,4-dicarboxaldehyde (**S18**)<sup>S3</sup> with *N*-(2,6-diisopropylphenyl)maleimide (**S19**)<sup>S4</sup> gave the isoindole **S20**, which was detosylated to give **S21**. Neither **S20** nor **S21** could be converted (the latter upon iodination and Pd-mediated alkylation with alkynoic acid **15**) to the target **S-V** or **S-VI**, respectively. To our knowledge, compounds **S20** and **S21** are new.

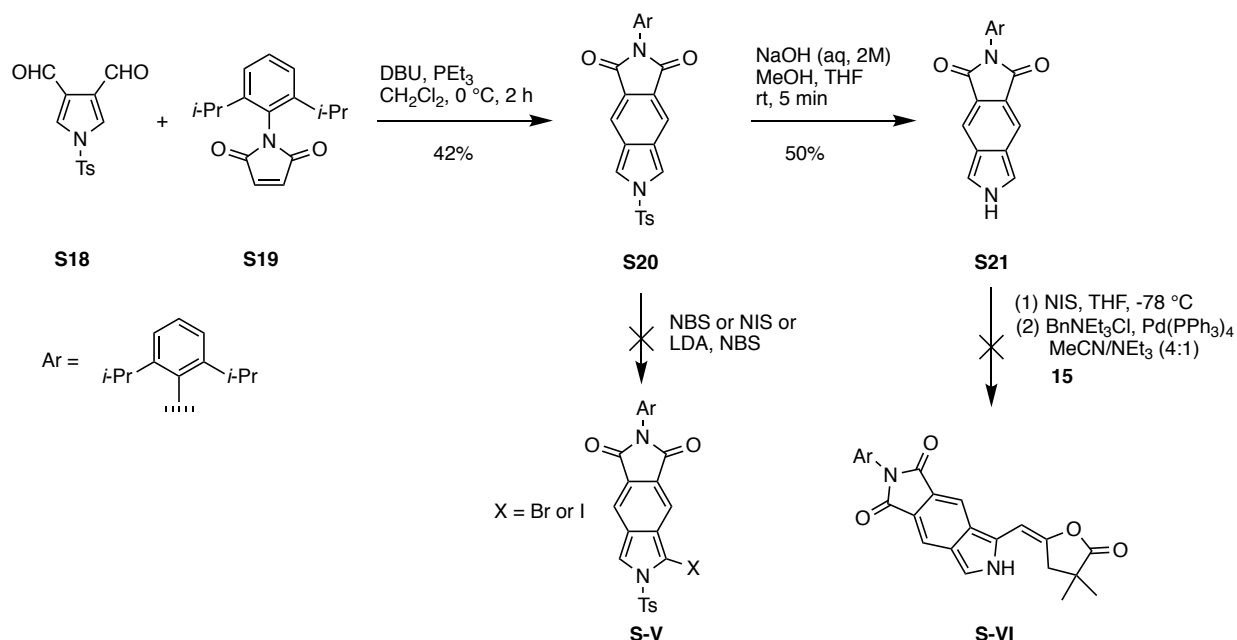

**Scheme S9.** Attempted synthesis of an isoindole–lactone (**S-V**) and an annulated pyrrole–ene–lactone (**S-VI**).

Finally, maleimide **S19** and sulfono-pyrrole **S22**<sup>S5,S6</sup> were reacted to give the cyclohexane-annulated pyrrole **S23** in good yield (Scheme S10). Note that **S23** is expected as a racemic mixture. Saponification followed by esterification with *tert*-butyl alcohol on the target pyrrole failed, however. The imide was hydrolyzed prior to the ester group, which can be attributed to the extra strain from the diisopropyl-substituted phenyl group. Thus, the target pyrrole **S-VII**, again an intermediate on the path to a dihydrodipyririn, was not obtained. To our knowledge, compound **S23** is new.

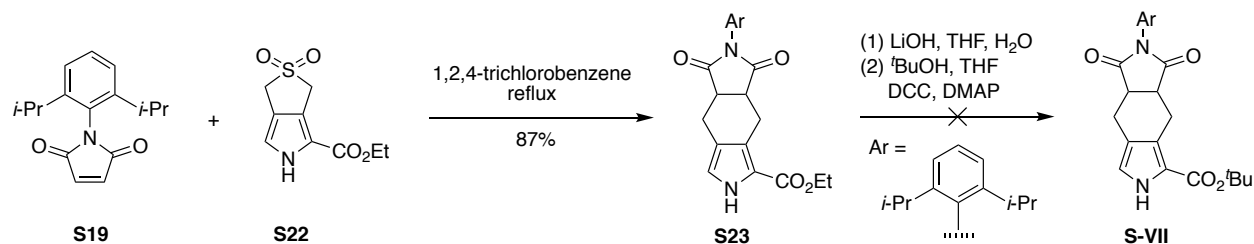

**Scheme S10.** Attempted synthesis of a cyclohexane-annulated pyrrole (**S-VII**).

## Experimental Section

Non-commercial compounds **S1**,<sup>S1</sup> **S11**,<sup>S2</sup> **S18**,<sup>S3</sup> **S19**,<sup>S4</sup> and **S22**<sup>S5,S6</sup> were prepared via literature procedures.

**1-(2-Nitroethyl)-2H-dibenzo[e,g]isoindole (S2).** Following a general procedure,<sup>43</sup> a mixture of **S1** (0.490 g, 2.00 mmol), potassium acetate (0.157 g, 1.60 mmol), and methylamine hydrochloride (0.108 g, 1.60 mmol) in absolute ethanol (4 mL) was treated with nitromethane (0.54 mL, 10 mmol). The reaction mixture was heated at 70 °C for 2 h, and then CH<sub>2</sub>Cl<sub>2</sub> and water were added. The organic layer was dried (Na<sub>2</sub>SO<sub>4</sub>) and concentrated. The resulting yellow solid was dried under high vacuum, and then used directly in the next step. The crude solid material was dissolved in CHCl<sub>3</sub>/2-propanol (3:1, 60 mL), treated with silica (4 g) and NaBH<sub>4</sub> (0.151 g, 4 mmol), and stirred at room temperature under argon for 2 h. The reaction mixture was filtered. The filtrate was concentrated. The resulting crude material was dissolved in CH<sub>2</sub>Cl<sub>2</sub>. The organic solution was washed (water, brine), dried (Na<sub>2</sub>SO<sub>4</sub>), and concentrated to afford a pale brown solid (0.45 g, 78%): mp 260–262 °C; <sup>1</sup>H NMR (400 MHz) δ 3.78 (t, *J* = 6.8 Hz, 2H), 4.68 (t, *J* = 6.8 Hz, 2H), 7.37–7.53 (m, 5H), 7.89 (d, *J* = 3.2 Hz, 1H), 7.96 (d, *J* = 8.4 Hz, 1H), 8.42 (d, *J* = 7.6 Hz, 1H), 8.50 (d, *J* = 8.0 Hz, 1H), 8.83 (br s, 1H); <sup>13</sup>C NMR (100 MHz) δ 26.9, 73.9, 109.2, 115.2, 118.9, 121.1, 122.8, 123.0, 123.5, 124.2, 125.0, 125.4, 127.25, 127.28, 128.50, 128.52, 129.0, 129.6; ESI-MS obsd 291.1121, calcd 291.1128 [(M + H)<sup>+</sup>, M = C<sub>18</sub>H<sub>14</sub>N<sub>2</sub>O<sub>2</sub>].

**6-(2H-Dibenzo[e,g]isoindol-1-yl)-1,1-dimethoxy-4,4-dimethyl-5-nitrohexan-2-one (S3).** Following a general procedure,<sup>43</sup> a mixture of **S2** (58 mg, 0.20 mmol) and **11** (38 mg, 0.24 mmol) in CH<sub>3</sub>CN (0.2 mL) was treated with DBU (89 μL, 0.60 mmol). The reaction mixture was stirred at room temperature under argon for 16 h, diluted with ethyl acetate (30 mL), and washed with water and brine. The organic layer was dried (Na<sub>2</sub>SO<sub>4</sub>) and concentrated. The resulting crude solid was triturated with diethyl ether. Filtration afforded a pale brown solid (60 mg, 67%); <sup>1</sup>H NMR (400 MHz) δ 1.26 (s, 3H), 1.45 (s, 3H), 2.75 (ABq, Δδ<sub>AB</sub> = 0.10, *J* = 18.8 Hz, 2H), 3.41 (s, 3H), 3.43 (s, 3H), 3.76 (d, *J* = 6.8 Hz, 1H), 3.78 (s, 1H), 4.36 (s, 1H), 5.40–5.44 (m, 1H), 7.40–7.56 (m, 5H), 7.95–8.00 (m, 2H), 8.42–8.44 (m, 1H), 8.51 (dd, *J* = 8.0 Hz and 1.2 Hz, 1H), 8.75 (br s, 1H); <sup>13</sup>C NMR (100 MHz) δ 24.0, 24.3, 27.8, 36.7, 44.7, 55.18, 55.24, 93.7, 104.7, 109.4, 115.4, 118.9, 120.9, 123.0, 123.3, 123.4, 124.0, 124.8, 125.2, 127.0, 127.1, 128.5, 128.7, 129.2, 129.5, 203.4; ESI-MS obsd 449.2070, calcd 449.2071 [(M + H)<sup>+</sup>, M = C<sub>26</sub>H<sub>28</sub>N<sub>2</sub>O<sub>5</sub>].

**(Z)-1-((5-(Dimethoxymethyl)-3,3-dimethyl-3,4-dihydro-2H-pyrrol-2-ylidene)methyl)-2H-dibenzo[e,g]isoindole (S-I).** Following a general procedure,<sup>43</sup> in a first flask a solution of **S3** (30 mg, 0.067 mmol) in freshly distilled THF (3.0 mL) and anhydrous MeOH (30 μL) at 0 °C was treated with NaOMe (11 mg, 0.21 mmol). The mixture was stirred and degassed by bubbling argon through the solution for 45 min. In a second flask purged with argon, TiCl<sub>3</sub> (0.41 mL, 20% w/v in 2N HCl solution, 0.54 mmol), 5 mL of THF, and NH<sub>4</sub>OAc

(284 mg, 3.69 mmol) were combined under argon, and the mixture was degassed by bubbling with argon for 45 min. Then the first flask mixture was transferred via cannula to the buffered  $\text{TiCl}_3$  mixture. The resulting mixture was stirred at room temperature for 16 h under argon. Saturated aqueous  $\text{NaHCO}_3$  was added, and the resulting mixture was then extracted with ethyl acetate. The organic phase was washed with brine, dried ( $\text{Na}_2\text{SO}_4$ ), and concentrated. The crude product decomposed immediately.

**2,2'-Dibromo-4,4'-diethoxycarbonylbiphenyl (S5).** A solution of 4,4'-diethoxycarbonylbiphenyl (**S4**, 2.983 g, 9.999 mmol) and 1,3-dibromo-5,5-dimethylhydantoin (3.002 g, 10.50 mmol) in 1,2-dichloroethane (20.0 mL) was treated with TfOH (1.8 mL, 20 mmol) at room temperature. The reaction mixture was heated at 50 °C for 1 h and then allowed to cool to room temperature. The mixture was washed with saturated aqueous  $\text{NaHCO}_3$  (60 mL) and brine (20 mL). The organic layer was dried ( $\text{Na}_2\text{SO}_4$ ), filtered, and concentrated under reduced pressure. Column chromatography [silica, hexanes/ethyl acetate (40:1)] afforded a white solid (2.39 g, 52%):  $^1\text{H}$  NMR (300 MHz,  $\text{CDCl}_3$ )  $\delta$  8.36 (d,  $J = 1.4$  Hz, 2H), 8.01 (dd,  $J = 1.4, 8.2$  Hz, 2H), 7.31 (d,  $J = 8.2$  Hz, 2H), 4.42 (q,  $J = 7.0$  Hz, 4H), 1.43 (t,  $J = 7.0$  Hz, 6H);  $^{13}\text{C}$  NMR (75 MHz,  $\text{CDCl}_3$ )  $\delta$  165.1, 145.6, 133.9, 132.1, 130.7, 128.4, 123.2, 61.7, 14.4; ESI-MS obsd 456.9483, calcd 456.9488 [(M + H)<sup>+</sup>, M =  $\text{C}_{18}\text{H}_{16}\text{Br}_2\text{O}_4$ ].

**2,2'-Dibromo-*N,N,N',N'*-tetraisopropyl-[1,1'-biphenyl]-4,4'-dicarboxamide (S6).** A mixture containing **S5** (0.228 g, 0.500 mmol) in EtOH/ $\text{H}_2\text{O}$ /THF (1/1/1, 1.5 mL) was treated with KOH (0.084 g, 1.50 mmol), and the resulting mixture was stirred at room temperature for 2 h. Then the mixture was carefully quenched with 2 M HCl, extracted with ethyl acetate (2 x 5 mL) and dried over  $\text{Na}_2\text{SO}_4$ . The combined organic extract was concentrated under reduced pressure to afford the corresponding dicarboxylic acid as a white solid (0.200 g, quantitative), which was used directly for further transformations. The dicarboxylic acid was refluxed with  $\text{SOCl}_2$  (1.5 mL) under argon for 18 h. Then, excess  $\text{SOCl}_2$  was removed under vacuum, and the resulting residue was used as such for further transformations. Thus, the residue was treated with diisopropylamine (0.42 mL, 3.0 mmol) at 0 °C in  $\text{CH}_2\text{Cl}_2$  (2.0 mL). Then, the reaction mixture was allowed to warm to room temperature, and stirring was continued for 18 h. The reaction mixture was washed with 2 M HCl and saturated aqueous  $\text{NH}_4\text{Cl}$  solution, treated with ethyl acetate (2 x 5 mL), and washed with brine. The organic layer was dried ( $\text{Na}_2\text{SO}_4$ ), concentrated and chromatographed [silica, hexanes/ethyl acetate (9:1)] to afford a colorless solid (0.239 g, 84%):  $^1\text{H}$  NMR (400 MHz,  $\text{CDCl}_3$ )  $\delta$  1.22 (br s, 12H), 1.54 (br s, 12H), 3.55 (br s, 2H), 3.91 (br s, 2H), 7.24 (s, 1H), 7.26 (s, 1H), 7.32 (dd,  $J = 7.6, 1.6$  Hz, 2H), 7.63 (d,  $J = 1.6$  Hz, 2H);  $^{13}\text{C}$  NMR (100 MHz,  $\text{CDCl}_3$ )  $\delta$  20.8, 46.1, 51.1, 123.5, 124.5, 130.0, 131.1, 140.1, 141.8, 168.9; ESI-MS obsd 565.1057, calcd 565.1060 [(M + H)<sup>+</sup>, M =  $\text{C}_{26}\text{H}_{34}\text{Br}_2\text{N}_2\text{O}_2$ ].

**Bis(2,6-di-*tert*-butyl-4-methylphenyl) 2,2'-dibromo-[1,1'-biphenyl]-4,4'-dicarboxylate (S7).** A reaction mixture of **S5** (0.456 g, 1.00 mmol) in EtOH/ $\text{H}_2\text{O}$ /THF (1/1/1, 3.0 mL) was treated with KOH (0.168 g, 2.99 mmol), and the resulting mixture was stirred at room temperature for 2 h. Then the mixture was carefully quenched with 2 M HCl, extracted with ethyl acetate (2 x 10 mL), and dried over  $\text{Na}_2\text{SO}_4$ . The combined organic extract was concentrated under vacuum to afford the corresponding dicarboxylic acid as a white solid (0.400 g, quantitative), which was used directly for further transformations. The dicarboxylic acid was refluxed with  $\text{SOCl}_2$  (3.0 mL) under argon atmosphere for 18 h. Then, the excess  $\text{SOCl}_2$  was removed under vacuum, and the resulting residue was used as such for further transformations. Thus, the resulting residue was treated overnight with 2,6-di-*tert*-butyl-4-hydroxytoluene (0.441 g, 2.00 mmol) and DMAP (0.244 g, 2.00 mmol) in benzene/pyridine (1:1, 3.0 mL) under reflux. Then, the reaction mixture was allowed to cool to room temperature. The reaction mixture was



washed with saturated aqueous NH<sub>4</sub>Cl solution, extracted with ethyl acetate (2 x 10 mL) and washed with brine. The organic layer was dried (Na<sub>2</sub>SO<sub>4</sub>) and concentrated. The resulting crude material was chromatographed [silica, hexanes/ethyl acetate (9:1)] to afford a pale yellow solid (0.162 g, 20%): <sup>1</sup>H NMR (400 MHz, CDCl<sub>3</sub>) δ 1.36 (s, 36H), 2.37 (s, 6H), 6.98 (s, 1H), 7.19 (s, 4H), 7.47 (d, *J* = 7.6 Hz, 2H), 8.26 (dd, *J* = 7.6, 1.2 Hz, 2H), 8.54 (d, *J* = 1.6 Hz, 2H); <sup>13</sup>C NMR (100 MHz, CDCl<sub>3</sub>) δ 21.3, 21.7, 30.4, 31.8, 34.3, 35.4, 123.6, 125.6, 127.3, 128.3, 129.0, 131.2, 132.3, 134.6, 135.0, 135.8, 142.2, 145.8, 146.0, 151.6, 165.5; ESI-MS obsd 820.2571, calcd 820.2571 [(M + NH<sub>4</sub>)<sup>+</sup>, M = C<sub>44</sub>H<sub>52</sub>Br<sub>2</sub>O<sub>4</sub>]. Note: The presence of atropisomers may account for the observed number of protons and carbons.

**(2-Bromo-4-(methoxycarbonyl)benzyl)triphenylphosphonium bromide (S8).**

Following a literature procedure<sup>S7</sup> with slight modification, a mixture of methyl 3-bromo-4-methylbenzoate (0.23 g, 1.0 mmol) and reagent-grade (not recrystallized) NBS (0.18 g, 1.0 mmol) in CCl<sub>4</sub> (26.0 mL) was treated with AIBN (3.0 mg, 16 μmol). The resulting mixture was heated overnight at reflux. After allowing to cool to room temperature, the mixture was filtered. The filtrate was concentrated under vacuum. The resulting residue was chromatographed (silica, gradient of 0–5% ethyl acetate in hexanes) to afford methyl 3-bromo-4-(bromomethyl)benzoate as a colorless solid (121 mg, 39%): <sup>1</sup>H NMR (400 MHz, CDCl<sub>3</sub>) δ 3.92 (s, 3H), 4.60 (s, 2H), 7.52 (d, *J* = 7.6 Hz, 1H), 7.95 (d, *J* = 6.4 Hz, 1H), 8.23 (s, 1H); <sup>13</sup>C NMR (400 MHz, CDCl<sub>3</sub>) δ 32.3, 52.6, 124.4, 129.0, 131.2, 131.8, 134.5, 141.8, 165.3. ESI-MS obsd 306.8966, calcd 306.8964 [(M + H)<sup>+</sup>, M = C<sub>9</sub>H<sub>8</sub>Br<sub>2</sub>O<sub>2</sub>]. The resulting methyl 3-bromo-4-(bromomethyl)benzoate (69.0 mg, 0.224 mmol) was treated with PPh<sub>3</sub> (58.8 mg, 0.224 mmol) in toluene and refluxed overnight. After allowing to cool to room temperature, the mixture was filtered. The solid phosphonium bromide was dried under high vacuum and utilized directly for the next reaction.

**Methyl (*E*)-3-bromo-4-(4-(methoxycarbonyl)styryl)benzoate (S9).** Following a reported procedure<sup>S8</sup> with slight modification, a mixture of **S8** (128 mg, 0.224 mmol) and methyl 4-formylbenzoate (36.8 mg, 0.224 mmol) in THF (1.0 mL) was treated with a solution of NaOMe in MeOH (97 μL of 25 wt% solution, 0.45 mmol). The reaction mixture was stirred overnight under nitrogen and was then neutralized by the addition of 1M HCl. The resulting mixture was extracted with CH<sub>2</sub>Cl<sub>2</sub>. The extract was washed with water (2x) and brine (2x), dried over Na<sub>2</sub>SO<sub>4</sub>, and filtered. The filtrate was concentrated and chromatographed [silica, hexanes/ethyl acetate (10:1)] to obtain a colorless solid (80 mg, 95%): <sup>1</sup>H NMR (400 MHz, CDCl<sub>3</sub>) δ 3.94 (s, 6H), 7.17 (d, *J* = 16.0 Hz, 1H), 7.58 (d, *J* = 16.4 Hz, 1H), 7.62 (d, *J* = 8.4 Hz, 2H), 7.74 (d, *J* = 8.4 Hz, 1H), 7.98 (dd, *J* = 8.0, 1.2 Hz, 1H), 8.06 (d, *J* = 8.0 Hz, 2H), 8.27 (d, *J* = 1.2 Hz, 1H); <sup>13</sup>C NMR (100 MHz, CDCl<sub>3</sub>) δ 52.1, 52.4, 124.0, 126.4, 126.7, 126.9, 128.5, 128.7, 129.7, 130.0, 130.6, 132.3, 133.3, 134.3, 140.6, 140.7, 165.4, 166.6; ESI-MS obsd 375.0228, calcd 375.0227 [(M + H)<sup>+</sup>, M = C<sub>18</sub>H<sub>15</sub>BrO<sub>4</sub>].

**Dimethyl phenanthrene-3,6-dicarboxylate (S10).** Following a general procedure,<sup>S9</sup> a mixture of **S9** (2.01 g, 5.36 mmol), K<sub>2</sub>CO<sub>3</sub> (3.71 g, 26.8 mmol), LiCl (0.34 g, 8.0 mmol), *n*-Bu<sub>4</sub>NBr (10.7 mmol, 3.45 g), and Pd(OAc)<sub>2</sub> (0.24 g, 1.07 mmol) in DMF (60 mL) was added to a Schlenk flask and deaerated by three freeze-pump-thaw cycles, followed by heating at 110 °C for 15 h. After allowing to cool to room temperature, the mixture was poured into water (250 mL) and extracted with CH<sub>2</sub>Cl<sub>2</sub> (2 x 200 mL). The combined organic extract was washed with brine (2 x 200 mL), dried over Na<sub>2</sub>SO<sub>4</sub> and concentrated. The resulting residue was chromatographed [silica, hexanes/ethyl acetate/CH<sub>2</sub>Cl<sub>2</sub> (15:1:0 to 20:2:5)] to give a colorless crystalline solid (696.4 mg, 23.4%): mp 207–208 °C; <sup>1</sup>H NMR (400 MHz, CDCl<sub>3</sub>) δ 4.06 (s, 6H), 7.86 (s, 2H), 7.95 (d, *J* = 11.2 Hz, 2H), 8.25 (dd, *J* = 10.8, 2.0 Hz, 2H), 9.48 (s, 2H); <sup>13</sup>C NMR

(100 MHz, CDCl<sub>3</sub>)  $\delta$  52.5, 125.3, 127.2, 128.6, 128.8, 128.9, 130.1, 134.9, 167.3; ESI-MS obsd 295.0966, calcd 295.0965 [(M + H)<sup>+</sup>, M = C<sub>18</sub>H<sub>14</sub>O<sub>4</sub>].

**Methyl (Z)-3-bromo-4-(4-(methoxycarbonyl)styryl)benzoate (S12).** Following a general procedure,<sup>59</sup> a reaction mixture of (4-(methoxycarbonyl)benzyl)triphenylphosphonium bromide (3.78 g, 7.69 mmol) in THF (30.0 ml) under argon at 0 °C was treated dropwise with a 1.6 M solution of *n*-BuLi in hexane (4.82 mL, 7.7 mmol). The resulting red solution was stirred for 30 min. A solution of **S11** (1.87 g, 7.69 mmol) in THF (20.0 mL) was added dropwise, discoloring the solution. The solution was then allowed to warm to room temperature, and then further stirred for 30 min. After addition of water (50 mL), the mixture was extracted with hexanes (3 x 50 mL). The combined organic extract was dried over Na<sub>2</sub>SO<sub>4</sub> and concentrated. TLC analysis showed three components. The residue was chromatographed [silica, hexanes/ethyl acetate (10:1)] to give a viscous liquid (1.7 g, 59%) comprised of two components – the title compound and a closely chromatographing unknown – followed by **S9** (0.82 g, 28%). The mixture of the title compound and the unknown could be used directly in the next step. Note that **S9** and **S12** are *E* and *Z* isomers, respectively.

**Dimethyl 9-nitrophenanthrene-3,6-dicarboxylate (S13).** Following a general procedure with modification,<sup>68</sup> a slurry of **S12** (0.87 g, 3.0 mmol) in glacial acetic acid (3.2 mL) and acetic anhydride (2.0 mL) was heated to 45 °C, whereupon HNO<sub>3</sub> (2.0 mL, 70%) was slowly added dropwise to avoid an overly vigorous reaction. Then the mixture was heated at 90 °C for 12 h. After allowing to cool to room temperature, the resulting orange solution was poured into 20 mL of ice-water and extracted with CH<sub>2</sub>Cl<sub>2</sub> (2 x 25 mL). The combined organic extract was washed with water (25.0 mL), saturated aqueous NaHCO<sub>3</sub> solution (25.0 mL), and brine (25.0 mL). The resulting crude material showed two spots on TLC [silica, hexanes/ethyl acetate (4:1)]: starting material (R<sub>f</sub> = 0.40) and product (R<sub>f</sub> = 0.27). The organic layer was dried over Na<sub>2</sub>SO<sub>4</sub>, concentrated and chromatographed [silica, hexanes/ethyl acetate/CH<sub>2</sub>Cl<sub>2</sub> (15:1:0 to 20:2:5)] to give unreacted starting material (178 mg, 20%) and then a light-yellow solid (172 mg, 17%): mp 215–216 °C; <sup>1</sup>H NMR (300 MHz, CDCl<sub>3</sub>)  $\delta$  4.09 (s, 6H), 8.11 (d, *J* = 8.4 Hz, 1H), 8.25–8.40 (m, 2H), 8.50–8.60 (s, 2H), 9.49 (s, 1H), 9.54 (s, 1H); <sup>13</sup>C NMR (100 MHz, CDCl<sub>3</sub>)  $\delta$  52.6, 52.7, 124.3, 124.9, 125.1, 125.7, 126.3, 128.1, 128.4, 129.6, 130.6, 130.9, 131.4, 131.5, 131.7, 147.0, 166.4, 166.5; ESI-MS obsd 340.0811, calcd 340.0816 [(M + H)<sup>+</sup>, M = C<sub>18</sub>H<sub>13</sub>NO<sub>6</sub>].

**1-tert-Butyl-6,9-dimethyl 2H-dibenzo[e,g]isoindole-1,6,9-tricarboxylate (S14).** Following a general procedure,<sup>68</sup> a mixture of **S13** (398.3 mg, 1.174 mmol) and *tert*-butyl isocynoacetate (331.4 mg, 2.348 mmol) in THF/2-propanol (1:1, 10.0 mL) was treated dropwise with DBU (354  $\mu$ L, 2.36 mmol). The mixture was stirred overnight at room temperature. Then the reaction mixture was diluted with ethyl acetate (50 mL), washed with water (30 mL), dried over Na<sub>2</sub>SO<sub>4</sub>, and concentrated. The resulting residue was chromatographed [silica, hexanes/ethyl acetate (4:1 to 2:1)] to give a pale yellow solid (242 mg, 48%): mp 210–211 °C; <sup>1</sup>H NMR (400 MHz, CDCl<sub>3</sub>)  $\delta$  1.72 (s, 9H), 4.03 (s, 3H), 4.04 (s, 3H), 7.75 (d, *J* = 3.6 Hz, 1H), 8.01 (d, *J* = 8.4 Hz, 1H), 8.11 (dd, *J* = 8.8, 1.6 Hz, 1H), 8.20 (dd, *J* = 8.8, 1.6 Hz, 1H), 9.20 (s, 1H), 9.22 (s, 1H), 9.74 (d, *J* = 8.8 Hz, 1H), 10.10 (br s, 1H); <sup>13</sup>C NMR (100 MHz, CDCl<sub>3</sub>)  $\delta$  28.6, 52.3, 82.5, 115.2, 118.7, 122.5, 122.9, 125.2, 125.8, 127.3, 127.6, 127.8, 127.9, 128.2, 128.6, 129.8, 131.3, 131.4, 159.9, 167.3, 167.4; ESI-MS obsd 434.1592, calcd 434.1598 [(M + H)<sup>+</sup>, M = C<sub>25</sub>H<sub>23</sub>NO<sub>6</sub>].

**1-tert-Butyl-6,9-dimethyl 3-formyl-2H-dibenzo[e,g]isoindole-1,6,9-tricarboxylate (S15).** Following a reported procedure<sup>S1</sup> with slight modification, a mixture of **S14** (175.0 mg, 0.4037 mmol) in CH<sub>2</sub>Cl<sub>2</sub> (0.8 mL) was treated with DMF (93  $\mu$ L, 1.2 mmol), cooled in an ice-

bath, and then POCl<sub>3</sub> (112 μL, 1.20 mmol) was added dropwise. Then the ice-bath was removed, and the mixture was stirred at 40 °C for 2 h. The mixture was then allowed to cool to 25–30 °C, whereupon a solution of sodium acetate (1.0 g) in water (4.0 mL) was added dropwise, and the reaction mixture was refluxed for an additional 15 min. The two layers were separated, and the aqueous portion of the mixture was extracted with ethyl acetate. The combined organic extract was washed with saturated Na<sub>2</sub>CO<sub>3</sub> solution, dried over Na<sub>2</sub>SO<sub>4</sub>, and concentrated to afford a brown solid (116.0 mg, 90%): mp 178 °C (dec.); <sup>1</sup>H NMR (400 MHz, THF-*d*<sub>8</sub>) δ 1.75 (s, 9H), 3.99 (s, 3H), 4.00 (s, 3H), 8.15–8.18 (m, 2H), 9.20 (s, 2H), 9.34 (dd, *J* = 8.5, 1.9 Hz, 2H), 9.55 (dd, *J* = 8.6, 2.0 Hz, 2H), 10.36 (s, 1H); <sup>13</sup>C NMR (100 MHz, THF-*d*<sub>8</sub>) δ 27.44, 51.35, 51.38, 83.24, 123.0, 123.8, 124.3, 124.5, 124.6, 127.1, 127.5, 127.8, 127.9, 128.3, 128.8, 129.3, 129.6, 130.2, 130.3, 159.8, 165.9, 166.0, 179.8; ESI-MS obsd 462.1539, calcd 462.1547 [(M + H)<sup>+</sup>, M = C<sub>26</sub>H<sub>23</sub>NO<sub>7</sub>].

**1-*tert*-Butyl-6,9-dimethyl 3-(2-nitroethyl)-2*H*-dibenzo[*e,g*]isoindole-1,6,9-tricarboxylate (S16).** Following a reported procedure,<sup>43</sup> a mixture of **S15** (60.3 mg, 0.131 mmol), acetic acid (12 μL) and *n*-propylamine (24 μL) in nitromethane (2 mL) and THF (4 mL) was heated at 40 °C for 1.5 h. Then the resulting solution was concentrated and dried under high vacuum. The resulting oil was dissolved in CHCl<sub>3</sub>/2-propanol (4 mL, 3:1) and treated with silica (100 mg). NaBH<sub>4</sub> (12.5 mg, 0.33 mmol) was added, and the mixture was stirred at room temperature under argon for 1 h. Then 5 drops of methanol were added, and stirring was continued for 30 min. The reaction mixture was filtered. The filtrate was concentrated and chromatographed (silica, hexanes/ethyl acetate, 1:1) to afford a viscous oil (26 mg), which comprised a mixture of pyrrole **S14** and desired compound **S16**. The formation of the desired 2-(2-nitroethyl)pyrrole **S16** was identified by mass spectrometry and by <sup>1</sup>H NMR spectroscopy: two triplet peaks at 4.86 (*J* = 6.9 Hz, 2H) and 3.97 (*J* = 7.0 Hz, 2H) ppm. However, this mixture could not be further separated and purified due to the essentially identical R<sub>f</sub> values of **S14** and **S16** on TLC. The ratio of **S14** and **S16** (60:40) was evaluated by integration of the <sup>1</sup>H NMR spectrum. ESI-MS obsd 507.1742, calcd 507.1762 [(M + H)<sup>+</sup>, M = C<sub>27</sub>H<sub>26</sub>N<sub>2</sub>O<sub>8</sub>].

**1-*tert*-Butyl-6,9-dimethyl 3-bromo-2*H*-dibenzo[*e,g*]isoindole-1,6,9-tricarboxylate (S17).** A mixture of **S14** (31.5 mg, 72.7 μmol) in THF (1.5 mL) was treated with NBS (15.6 mg, 87.6 μmol) at room temperature and stirred for 1 h. The mixture was concentrated and chromatographed [silica, hexanes/ethyl acetate (4:1)] to afford a light yellow solid (20.0 mg, 54%): <sup>1</sup>H NMR (500 MHz, CDCl<sub>3</sub>) δ 1.73 (s, 9H), 4.04 (s, 6H), 7.75 (m, 2H), 9.07 (d, *J* = 8.5 Hz, 1H), 9.32 (d, *J* = 8.6 Hz, 2H), 9.77 (d, *J* = 8.6 Hz, 1H), 9.88 (br s, 1H); <sup>13</sup>C NMR (150 MHz, CDCl<sub>3</sub>) δ 28.53, 29.71, 52.35, 83.24, 122.5, 125.3, 125.6, 127.8, 127.9, 128.6, 129.1, 130.0, 167.1; ESI-MS obsd 512.0680, calcd 512.0703 [(M + H)<sup>+</sup>, M = C<sub>25</sub>H<sub>22</sub>BrNO<sub>6</sub>].

**2-(2,6-Diisopropylphenyl)-6-tosylpyrrolo[3,4-*f*]isoindole-1,3(2*H*,6*H*)-dione (S20).** Following a reported procedure<sup>S10</sup> with slight modification, a solution of **S18** (0.335 g, 1.21 mmol) and **S19** (0.467 g, 1.81 mmol) in anhydrous CH<sub>2</sub>Cl<sub>2</sub> (6 mL) in a 50 mL flask was chilled to 0 °C under argon. A second solution of triethylphosphine (265 μL, 1.80 mmol) and DBU (19 μL, 1.3 mmol) in anhydrous CH<sub>2</sub>Cl<sub>2</sub> (6 mL) was added in one portion. The resulting solution became orange immediately and slowly turned to brown. After 2 h, the mixture was concentrated and chromatographed (silica, hexanes/ethyl acetate, 5:1) to afford a light yellow solid (253 mg, 42%): mp 124 °C (dec.); <sup>1</sup>H NMR (600 MHz, acetone-*d*<sub>6</sub>) δ 1.13 (d, *J* = 6.8 Hz, 12H), 2.44 (s, 3H), 2.77 (septet, *J* = 6.9 Hz, 2H, overlapped by HDO peak in acetone-*d*<sub>6</sub>), 7.33 (d, *J* = 7.8 Hz, 2H), 7.46 (t, *J* = 7.8 Hz, 1H), 7.53 (d, *J* = 7.7 Hz, 2H), 8.07 (d, *J* = 8.5 Hz, 2H), 8.23 (s, 2H), 8.25 (s, 2H); <sup>13</sup>C NMR (150 MHz, acetone-*d*<sub>6</sub>) δ 22.49, 25.02, 25.05, 25.07, 26.71, 36.15, 118.0, 121.7, 125.4, 125.5, 127.3, 127.8, 129.5, 130.0, 131.3, 131.4, 131.6, 132.4, 136.5, 148.2,

148.8, 148.9, 168.9, 178.9; ESI-MS obsd 501.1835, calcd 501.1843 [(M + H)<sup>+</sup>, M = C<sub>29</sub>H<sub>28</sub>N<sub>2</sub>O<sub>4</sub>S].

**2-(2,6-Diisopropylphenyl)pyrrolo[3,4-*f*]isoindole-1,3(2*H*,6*H*)-dione (S21).** A solution of **S20** (216 mg, 0.431 mmol) in methanol and THF (4 mL, 3:1) was treated with aqueous NaOH (1 mL of 2 M solution, 2 mmol). The mixture turned black in a few seconds and was further stirred for 5 min. Water (30 mL) and ethyl acetate (2 x 15 mL) were added. The organic phase was dried over Na<sub>2</sub>SO<sub>4</sub> and concentrated. The resulting residue was chromatographed (silica, deactivated by 5% triethylamine in hexanes, hexanes/ethyl acetate, 2:1 to 1:1) to afford a brown solid (75 mg, 50%): mp 150 °C (dec.); <sup>1</sup>H NMR (600 MHz, CD<sub>3</sub>OD) δ 1.72 (d, *J* = 6.8 Hz, 12H), 2.76 (septet, *J* = 6.9 Hz, 2H), 7.32 (d, *J* = 7.8 Hz, 2H), 7.46 (t, *J* = 7.9 Hz, 1H), 7.67 (s, 2H), 8.27 (s, 2H); <sup>13</sup>C NMR (150 MHz, CD<sub>3</sub>OD) δ 22.80, 29.16, 114.5, 119.9, 121.8, 123.5, 124.3, 127.8, 129.6, 147.2, 169.2; ESI-MS obsd 347.1744, calcd 347.1754 [(M + H)<sup>+</sup>, M = C<sub>22</sub>H<sub>22</sub>N<sub>2</sub>O<sub>2</sub>].

**Iodination and coupling trial of S21.** A solution of isoindole **S21** (32.3 mg, 93.2 μmol) in freshly distilled THF (6 mL) was chilled to -78 °C, stirred vigorously for a few minutes, and treated with NIS (21.0 mg, 93.3 μmol) in three portions. After 15 min, the mixture was concentrated in the dark and quickly chromatographed [deactivated silica, hexanes/ethyl acetate (2:1 to 1:1)]. The resulting crude product with impurities was concentrated, dried under high vacuum with avoidance of light, and used directly in the next step. The formation of the monoiodinated isoindole was inferred by three peaks in the <sup>1</sup>H NMR spectrum: 7.84 (d, *J* = 1 Hz, 1H), 7.93 (s, 1H) and 8.24 (d, *J* = 1 Hz, 1H).

**Ethyl 6-(2,6-diisopropylphenyl)-5,7-dioxo-2,4,4a,5,6,7,7a,8-octahydropyrrolo[3,4-*f*]isoindole-1-carboxylate (S23).** Followed a reported procedure,<sup>S6</sup> a solution of **S22** (779.7 mg, 3.401 mmol) in 1,2,4-trichlorobenzene (67 mL) was treated with **S19** (1.77 g, 6.88 mmol), and the mixture was refluxed for 3.5 h. The solution was allowed to cool to room temperature, and then directly transferred to a column packed with silica. The solvent was eluted with hexanes and the residue was further eluted [silica, hexanes/ethyl acetate (5:1 to 2:1)] and concentrated to give a grey solid (1.25 g, 87%): mp 225–227 °C; <sup>1</sup>H NMR (600 MHz, CDCl<sub>3</sub>) δ 0.78 (d, *J* = 6.8 Hz, 3H), 0.81 (d, *J* = 6.8 Hz, 3H), 1.14 (d, *J* = 2.3 Hz, 3H), 1.15 (d, *J* = 2.3 Hz, 3H), 1.26 (sextet, *J* = 6.2 Hz, 1H), 1.34 (t, *J* = 7.1 Hz, 3H), 2.58 (septet, *J* = 6.8 Hz, 1H), 2.76 (dd, *J* = 14.9, 6.3 Hz, 1H), 2.83 (dd, *J* = 15.3, 7.0 Hz, 1H), 3.35 (d, *J* = 14.9 Hz, 1H), 3.51–3.57 (m, 2H), 3.98 (d, *J* = 14.6 Hz, 1H), 4.25–4.29 (m, 1H), 4.31–4.38 (m, 1H), 6.79 (d, *J* = 2.8 Hz, 1H), 7.09 (d, *J* = 7.7 Hz, 1H), 7.18 (d, *J* = 7.8 Hz, 1H), 7.32 (t, *J* = 7.7 Hz, 1H), 8.92 (br, 1H); <sup>13</sup>C NMR (150 MHz, CDCl<sub>3</sub>) δ 14.44, 21.89, 22.58, 23.83, 23.84, 23.90, 24.17, 28.43, 29.25, 40.47, 40.86, 60.36, 118.2, 118.7, 120.0, 123.7, 124.0, 127.5, 129.9, 145.5, 146.2, 179.5, 179.6; ESI-MS obsd 423.2278, calcd 423.2257 [(M + H)<sup>+</sup>, M = C<sub>25</sub>H<sub>30</sub>N<sub>2</sub>O<sub>4</sub>].

## 2. X-Ray structure of 18

**Figure S1.** ORTEP drawing of the single-crystal X-ray structure of dihydrodipyrin **18**. All ellipsoids are contoured at the 50% level.

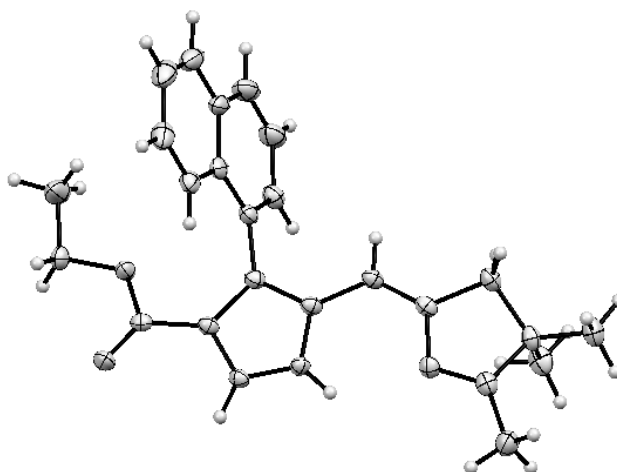

**Table S1.** Summary of single-crystal X-ray data for dihydrodipyrin **18**.

|                                                    |                                                               |
|----------------------------------------------------|---------------------------------------------------------------|
| CCDC registry                                      | 1900118                                                       |
| Formula                                            | C <sub>25</sub> H <sub>26</sub> N <sub>2</sub> O <sub>2</sub> |
| Formula Weight (g/mol)                             | 386.48                                                        |
| Crystal Dimensions (mm)                            | 0.088×0.144×0.199                                             |
| Crystal System                                     | monoclinic                                                    |
| Space Group                                        | P 1 21/n 1                                                    |
| Temperature (K)                                    | 121(2)                                                        |
| <i>a</i> (Å)                                       | 15.7670(4)                                                    |
| <i>b</i> (Å)                                       | 7.3416(2)                                                     |
| <i>c</i> (Å)                                       | 18.1519(4)                                                    |
| $\alpha$ (°)                                       | 90                                                            |
| $\beta$ (°)                                        | 94.7904(10)                                                   |
| $\gamma$ (°)                                       | 90                                                            |
| <i>V</i> (Å <sup>3</sup> )                         | 2093.83(9)                                                    |
| Number of reflections to determine final unit cell | 30616                                                         |
| Min and Max 2 $\theta$ for cell determination (°)  | 4.503, 50.98                                                  |
| <i>Z</i>                                           | 4                                                             |
| <i>F</i> (000)                                     | 824                                                           |
| $\rho$ (g/cm <sup>3</sup> )                        | 1.226                                                         |
| $\lambda$ (Å, Mo K $\alpha$ )                      | 0.71073                                                       |
| $\mu$ (mm <sup>-1</sup> )                          | 0.078                                                         |
| Max 2 $\theta$ for data collection (°)             | 1.79, 27.11                                                   |
| Measured fraction of data                          | 0.999                                                         |
| Number of reflections measured                     | 30616                                                         |
| Unique reflections measured                        | 4625                                                          |
| R <sub>merge</sub>                                 | 0.0439                                                        |
| Number of parameters in least-squares              | 269                                                           |
| R <sub>1</sub>                                     | 0.0476                                                        |
| wR <sub>2</sub>                                    | 0.1138                                                        |
| R <sub>1</sub> (all data)                          | 0.0724                                                        |
| wR <sub>2</sub> (all data)                         | 0.1264                                                        |

### 3. Attempted oxidative annulations

**Table S2.** Bacteriochlorins subjected to oxidative conditions for annulation.

| Bacteriochlorin | Conditions                                                                   | Results                                                                                                 |
|-----------------|------------------------------------------------------------------------------|---------------------------------------------------------------------------------------------------------|
| <b>BC-4</b>     | DDQ, CH <sub>2</sub> Cl <sub>2</sub>                                         | Decomposition to oxidized products (oxobacteriochlorin, tentatively assigned by MALDI <i>m/z</i> = 780) |
| <b>BC-4</b>     | FeCl <sub>3</sub> , CH <sub>2</sub> Cl <sub>2</sub> /MeNO <sub>2</sub>       | No reaction                                                                                             |
| <b>BC-5</b>     | DDQ, CH <sub>2</sub> Cl <sub>2</sub>                                         | Decomposition to oxidized products                                                                      |
| <b>BC-5</b>     | DDQ, Sc(OTf) <sub>3</sub> , CH <sub>2</sub> Cl <sub>2</sub>                  | Decomposition to oxidized products                                                                      |
| <b>BC-5</b>     | FeCl <sub>3</sub> , DTBP, CH <sub>2</sub> Cl <sub>2</sub> /MeNO <sub>2</sub> | No reaction                                                                                             |
| <b>BC-6</b>     | FeCl <sub>3</sub> , CH <sub>2</sub> Cl <sub>2</sub> /MeNO <sub>2</sub>       | Decomposition to a mixture of unidentified porphyrins, chlorins, and bacteriochlorins                   |
| <b>BC-7</b>     | DDQ, Sc(OTf) <sub>3</sub> , CH <sub>2</sub> Cl <sub>2</sub>                  | Decomposition                                                                                           |
| <b>BC-7</b>     | FeCl <sub>3</sub> , DTBP, CH <sub>2</sub> Cl <sub>2</sub> /MeNO <sub>2</sub> | Decomposition                                                                                           |
| <b>BC-8</b>     | DDQ, Sc(OTf) <sub>3</sub> , CH <sub>2</sub> Cl <sub>2</sub>                  | Decomposition to oxidized products                                                                      |
| <b>BC-8</b>     | DDQ, DTBP, Sc(OTf) <sub>3</sub> , CH <sub>2</sub> Cl <sub>2</sub>            | Decomposition to oxidized products                                                                      |
| <b>BC-8</b>     | FeCl <sub>3</sub> , DTBP, CH <sub>2</sub> Cl <sub>2</sub>                    | Decomposition                                                                                           |

**Table S3.** Summary of reaction conditions from attempted oxidative annulation of **BC-9**.

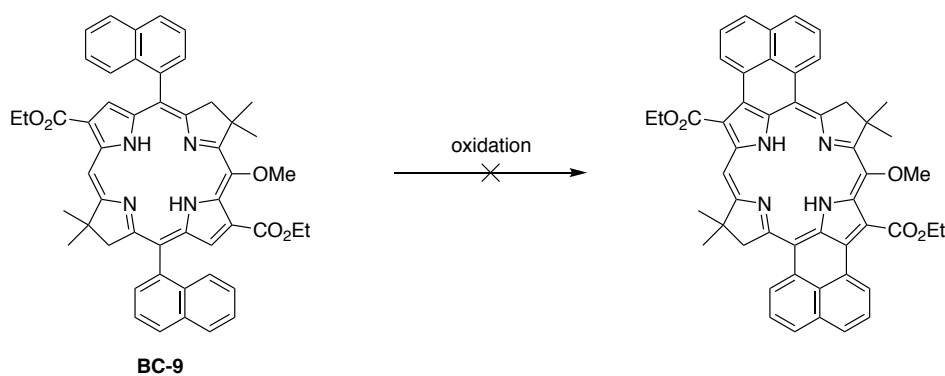

| Entry | Oxidizing reagent (equiv)                                                        | Solvent                                            | Temperature (°C)/Time | Observation             |
|-------|----------------------------------------------------------------------------------|----------------------------------------------------|-----------------------|-------------------------|
| 1     | DDQ (3)                                                                          | CH <sub>2</sub> Cl <sub>2</sub>                    | rt/3 h                | decomposed <sup>b</sup> |
| 2     | DDQ (5)/Sc(OTf) <sub>3</sub> (5)                                                 | CH <sub>2</sub> Cl <sub>2</sub>                    | rt/2 h                | decomposed <sup>b</sup> |
| 3     | FeCl <sub>3</sub> (10)                                                           | CH <sub>2</sub> Cl <sub>2</sub>                    | rt/12 h               | no reaction             |
| 4     | FeCl <sub>3</sub> (10)                                                           | CH <sub>2</sub> Cl <sub>2</sub> /MeNO <sub>2</sub> | 40/20 h               | no reaction             |
| 4     | PhI(OCOCH <sub>3</sub> ) <sub>2</sub> (1)                                        | CH <sub>2</sub> Cl <sub>2</sub>                    | 40/12 h               | no reaction             |
| 5     | PhI(OCOCF <sub>3</sub> ) <sub>2</sub> (1)                                        | CH <sub>2</sub> Cl <sub>2</sub>                    | 40/12 h               | no reaction             |
| 6     | PhI(OCOCF <sub>3</sub> ) <sub>2</sub> (1) /BF <sub>3</sub> ·OEt <sub>2</sub> (2) | CH <sub>2</sub> Cl <sub>2</sub>                    | rt/12 h               | no reaction             |
| 7     | AlCl <sub>3</sub> (26)/NaCl (11)                                                 | neat                                               | 140/5 h               | no reaction             |

<sup>a</sup>Reactions were conducted using **BC-9** (4 mM) and monitored by absorption spectroscopy.

<sup>b</sup>Bacteriochlorin **BC-9** was slowly oxidized into an oxobacteriochlorin and then decomposed.

**Table S4.** Summary of reaction conditions from attempted oxidative annulation of **S23** and **S24**.

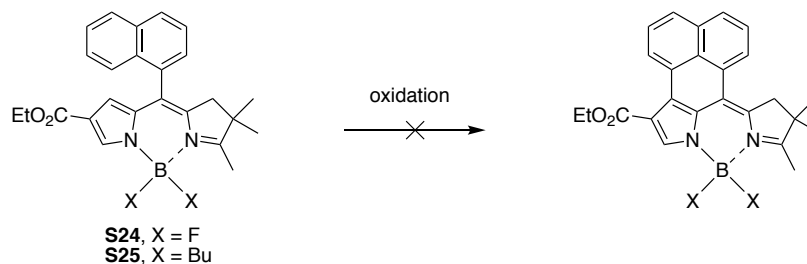

| Entry           | Compound   | Oxidizing reagent                                                            | Solvent                                            | Temperature (°C)/Time | Observation                       |
|-----------------|------------|------------------------------------------------------------------------------|----------------------------------------------------|-----------------------|-----------------------------------|
| 1 <sup>a</sup>  | <b>S24</b> | FeCl <sub>3</sub>                                                            | CH <sub>2</sub> Cl <sub>2</sub> /MeNO <sub>2</sub> | rt/30 min             | decomposed                        |
| 2 <sup>a</sup>  | <b>S24</b> | FeCl <sub>3</sub>                                                            | CH <sub>2</sub> Cl <sub>2</sub> /MeNO <sub>2</sub> | 0 °C/30 min           | decomposed                        |
| 3 <sup>a</sup>  | <b>S24</b> | FeCl <sub>3</sub> /DTBP                                                      | CH <sub>2</sub> Cl <sub>2</sub> /MeNO <sub>2</sub> | rt/30 min             | no reaction                       |
| 4 <sup>b</sup>  | <b>S24</b> | PhI(OCOCF <sub>3</sub> ) <sub>2</sub> /<br>BF <sub>3</sub> ·OEt <sub>2</sub> | CH <sub>2</sub> Cl <sub>2</sub>                    | rt/2 h                | no reaction                       |
| 5 <sup>c</sup>  | <b>S24</b> | FeCl <sub>3</sub> / cat.<br>BF <sub>3</sub> ·OEt <sub>2</sub>                | CH <sub>2</sub> Cl <sub>2</sub>                    | rt/30 min             | decomposed                        |
| 6 <sup>a</sup>  | <b>S24</b> | DDQ/Sc(OTf) <sub>3</sub>                                                     | CH <sub>2</sub> Cl <sub>2</sub>                    | rt/1 h                | decomposed                        |
| 7 <sup>a</sup>  | <b>S24</b> | DDQ/ BF <sub>3</sub> ·OEt <sub>2</sub>                                       | CH <sub>2</sub> Cl <sub>2</sub>                    | rt/1 h                | decomposed                        |
| 8 <sup>a</sup>  | <b>S24</b> | FeBr <sub>3</sub>                                                            | CH <sub>2</sub> Cl <sub>2</sub> /MeNO <sub>2</sub> | rt/30 min             | decomposed                        |
| 9 <sup>b</sup>  | <b>S24</b> | PhI(OCOCF <sub>3</sub> ) <sub>2</sub> /<br>BF <sub>3</sub> ·OEt <sub>2</sub> | toluene                                            | 110 °C/5 h            | no reaction                       |
| 10 <sup>d</sup> | <b>S24</b> | AuCl <sub>3</sub> /AgOTf                                                     | DCE                                                | rt/15 h               | no reaction                       |
| 11 <sup>d</sup> | <b>S24</b> | AuCl <sub>3</sub> /AgOTf                                                     | DCE                                                | 80 °C/6 h             | decomposed                        |
| 12 <sup>e</sup> | <b>S24</b> | AlCl <sub>3</sub> /NaCl                                                      | neat                                               | 150 °C/15 h           | no reaction                       |
| 13 <sup>a</sup> | <b>S24</b> | Fe(ClO <sub>4</sub> ) <sub>3</sub> ·2H <sub>2</sub> O                        | CH <sub>2</sub> Cl <sub>2</sub> /MeNO <sub>2</sub> | rt/30 min             | decomposed                        |
| 14 <sup>f</sup> | <b>S25</b> | FeCl <sub>3</sub>                                                            | CH <sub>2</sub> Cl <sub>2</sub> /MeNO <sub>2</sub> | rt/6 h                | multiple spots<br>observed in TLC |
| 15 <sup>f</sup> | <b>S25</b> | DDQ/Sc(OTf) <sub>3</sub>                                                     | CH <sub>2</sub> Cl <sub>2</sub>                    | rt/15 h               | decomposed                        |
| 16 <sup>f</sup> | <b>S25</b> | Fe(ClO <sub>4</sub> ) <sub>3</sub> ·2H <sub>2</sub> O                        | CH <sub>2</sub> Cl <sub>2</sub> /MeNO <sub>2</sub> | rt/30 min             | multiple spots<br>observed in TLC |

<sup>a</sup>Reactions were conducted using **S24** (5 mM), oxidizing reagent (25 mM), DTBP (50 mM).

<sup>b</sup>PhI(OCOCF<sub>3</sub>)<sub>2</sub> (2.5 mM), BF<sub>3</sub>·OEt<sub>2</sub> (5 mM). <sup>c</sup>FeCl<sub>3</sub> (50 mM), BF<sub>3</sub>·OEt<sub>2</sub> (2.5 mM). <sup>d</sup>AuCl<sub>3</sub> (1.5 mM), AgOTf (9 mM); DCE refers to 1,2-dichloroethane. <sup>e</sup>AlCl<sub>3</sub> (26 equiv), NaCl (11 equiv). <sup>f</sup>**S25** (5 mM), oxidizing reagent (25 mM).

#### 4. X-Ray structure of 21

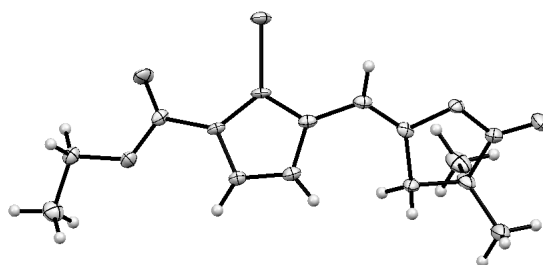

**Figure S2.** ORTEP drawing of the single-crystal X-ray structure of lactone-pyrrole **21**. All ellipsoids are contoured at the 50% level.

**Table S5.** Summary of single-crystal X-ray data for **21**.

|                                                    |                                                   |
|----------------------------------------------------|---------------------------------------------------|
| CCDC registry                                      | 1900109                                           |
| Formula                                            | C <sub>14</sub> H <sub>16</sub> BrNO <sub>4</sub> |
| Formula Weight (g/mol)                             | 342.19                                            |
| Crystal Dimensions (mm)                            | 0.087×0.121×0.151                                 |
| Crystal System                                     | orthorhombic                                      |
| Space Group                                        | P 21 21 21                                        |
| Temperature (K)                                    | 100(2)                                            |
| <i>a</i> (Å)                                       | 9.6116 (5)                                        |
| <i>b</i> (Å)                                       | 21.6883 (12)                                      |
| <i>c</i> (Å)                                       | 7.1486 (4)                                        |
| $\alpha$ (°)                                       | 90                                                |
| $\beta$ (°)                                        | 90                                                |
| $\gamma$ (°)                                       | 90                                                |
| <i>V</i> (Å <sup>3</sup> )                         | 1490.19 (14)                                      |
| Number of reflections to determine final unit cell | 9959                                              |
| Min and Max 2 $\theta$ for cell determination (°)  | 4.635, 58.78                                      |
| <i>Z</i>                                           | 4                                                 |
| <i>F</i> (000)                                     | 696                                               |
| $\rho$ (g/cm <sup>3</sup> )                        | 1.525                                             |
| $\lambda$ (Å, Mo K $\alpha$ )                      | 0.71073                                           |
| $\mu$ (mm <sup>-1</sup> )                          | 2.770                                             |
| Max 2 $\theta$ for data collection (°)             | 62.00                                             |
| Measured fraction of data                          | 0.998                                             |
| Number of reflections measured                     | 32573                                             |
| Unique reflections measured                        | 4721                                              |
| <i>R</i> <sub>merge</sub>                          | 3.99%                                             |
| Number of parameters in least-squares              | 184                                               |
| <i>R</i> <sub>1</sub>                              | 0.0400                                            |
| w <i>R</i> <sub>2</sub>                            | 0.0898                                            |
| <i>R</i> <sub>1</sub> (all data)                   | 0.0531                                            |
| w <i>R</i> <sub>2</sub> (all data)                 | 0.0938                                            |



## 5. Attempted Pd-coupling reactions

**Table S6.** Summary of reaction conditions from attempted borylation of **23**.

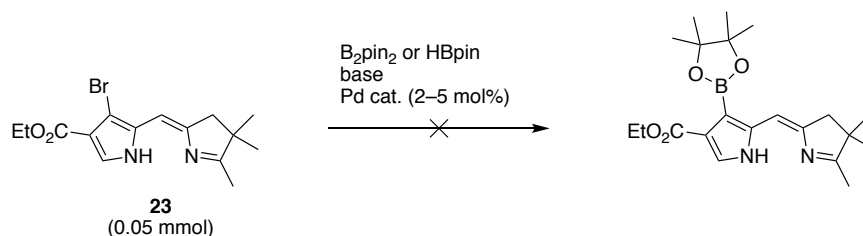

| Entry | Reaction conditions                                                                                                |
|-------|--------------------------------------------------------------------------------------------------------------------|
| 1     | $\text{B}_2\text{pin}_2$ , KOAc, $\text{PdCl}_2(\text{dppf})$ , 1,4-dioxane, 90 °C, 30 h                           |
| 2     | $\text{B}_2\text{pin}_2$ , KOAc, $\text{Pd}_2(\text{dba})_3 \cdot \text{CHCl}_3$ , SPhos, 1,4-dioxane, 90 °C, 30 h |
| 3     | HBpin, $\text{NEt}_3$ , $\text{PdCl}_2(\text{PhCN})_2$ , SPhos, 1,4-dioxane, 80 °C, 33 h                           |

**Table S7.** Summary of reaction conditions from attempted annulation of a dihydropyrrin.

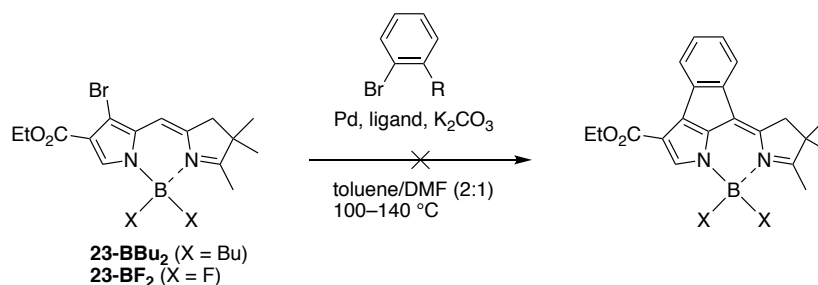

| Entry           | Compound                  | R                  | Pd/Ligand                                                                                |
|-----------------|---------------------------|--------------------|------------------------------------------------------------------------------------------|
| 1               | <b>23-BBu<sub>2</sub></b> | B(OH) <sub>2</sub> | $\text{Pd}(\text{PPh}_3)_4$                                                              |
| 2               | <b>23-BBu<sub>2</sub></b> | B(OH) <sub>2</sub> | $\text{Pd}_2(\text{dba})_3 \cdot \text{CHCl}_3/\text{SPhos}$                             |
| 3               | <b>23-BBu<sub>2</sub></b> | B(OH) <sub>2</sub> | $\text{Pd}_2(\text{dba})_3 \cdot \text{CHCl}_3/\text{P}(\text{o-tol})_3$                 |
| 4               | <b>23-BBu<sub>2</sub></b> | B(OH) <sub>2</sub> | $\text{Pd}_2(\text{dba})_3 \cdot \text{CHCl}_3/\text{P}^t\text{Bu}_3 \cdot \text{HBF}_4$ |
| 5               | <b>23-BBu<sub>2</sub></b> | B(OH) <sub>2</sub> | $\text{Pd}_2(\text{dba})_3 \cdot \text{CHCl}_3/\text{PCy}_3 \cdot \text{HBF}_4$          |
| 6               | <b>23-BBu<sub>2</sub></b> | Bpin <sub>2</sub>  | $\text{Pd}_2(\text{dba})_3 \cdot \text{CHCl}_3/\text{SPhos}$                             |
| 7               | <b>23-BBu<sub>2</sub></b> | Bpin <sub>2</sub>  | $\text{Pd}_2(\text{dba})_3 \cdot \text{CHCl}_3/\text{P}(\text{o-tol})_3$                 |
| 8               | <b>23-BBu<sub>2</sub></b> | Bpin <sub>2</sub>  | $\text{Pd}_2(\text{dba})_3 \cdot \text{CHCl}_3/\text{P}^t\text{Bu}_3 \cdot \text{HBF}_4$ |
| 9               | <b>23-BBu<sub>2</sub></b> | Bpin <sub>2</sub>  | $\text{Pd}_2(\text{dba})_3 \cdot \text{CHCl}_3/\text{PCy}_3 \cdot \text{HBF}_4$          |
| 10 <sup>a</sup> | <b>23-BF<sub>2</sub></b>  | B(OH) <sub>2</sub> | $\text{Pd}(\text{PPh}_3)_4$                                                              |
| 11 <sup>b</sup> | <b>23-BF<sub>2</sub></b>  | B(OH) <sub>2</sub> | $\text{Pd}_2(\text{dba})_3 \cdot \text{CHCl}_3/\text{SPhos}$                             |
| 12 <sup>c</sup> | <b>23-BF<sub>2</sub></b>  | B(OH) <sub>2</sub> | $\text{Pd}_2(\text{dba})_3 \cdot \text{CHCl}_3/\text{SPhos}$                             |

<sup>a</sup>The reaction was carried out at 80 °C. <sup>b</sup>The solvent was *o*-xylene/DMF (2:1). <sup>c</sup>The reaction was carried out at 60 °C.

## 6. X-Ray structure of 24

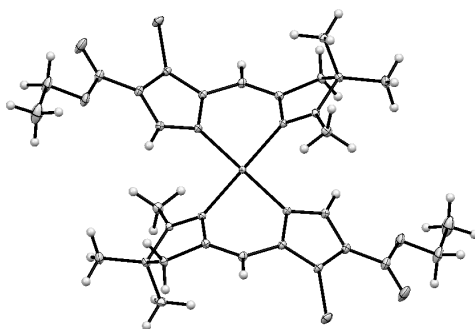

**Figure S3.** ORTEP drawing of the single-crystal X-ray structure of bis(dipyrrinato)Pd(II) complex **24**. All ellipsoids are contoured at the 50% level.

**Table S8.** Summary of single-crystal X-ray data for bis(dipyrrinato)Pd(II) complex **24**.

|                                                    |                                                                                  |
|----------------------------------------------------|----------------------------------------------------------------------------------|
| CCDC registry                                      | 1900117                                                                          |
| Formula                                            | C <sub>30</sub> H <sub>36</sub> Br <sub>2</sub> N <sub>4</sub> O <sub>4</sub> Pd |
| Formula Weight (g/mol)                             | 782.85                                                                           |
| Crystal Dimensions (mm)                            | 0.142×0.212×0.363                                                                |
| Crystal System                                     | monoclinic                                                                       |
| Space Group                                        | P 1 21/c 1                                                                       |
| Temperature (K)                                    | 100(2)                                                                           |
| <i>a</i> (Å)                                       | 13.0158(3)                                                                       |
| <i>b</i> (Å)                                       | 8.1799(2)                                                                        |
| <i>c</i> (Å)                                       | 14.3232(3)                                                                       |
| $\alpha$ (°)                                       | 90                                                                               |
| $\beta$ (°)                                        | 94.1060(9)                                                                       |
| $\gamma$ (°)                                       | 90                                                                               |
| <i>V</i> (Å <sup>3</sup> )                         | 1521.05(6)                                                                       |
| Number of reflections to determine final unit cell | 505                                                                              |
| Min and Max 2 $\theta$ for cell determination (°)  | 5.729, 68.65                                                                     |
| <i>Z</i>                                           | 2                                                                                |
| <i>F</i> (000)                                     | 784                                                                              |
| $\rho$ (g/cm <sup>3</sup> )                        | 1.709                                                                            |
| $\lambda$ (Å, Mo K $\alpha$ )                      | 0.71073                                                                          |
| $\mu$ (mm <sup>-1</sup> )                          | 3.279                                                                            |
| Max 2 $\theta$ for data collection (°)             | 80.86                                                                            |
| Measured fraction of data                          | 0.998                                                                            |
| Number of reflections measured                     | 71519                                                                            |
| Unique reflections measured                        | 9654                                                                             |
| R <sub>merge</sub>                                 | 2.23%                                                                            |
| Number of parameters in least-squares              | 191                                                                              |
| R <sub>1</sub>                                     | 0.0174                                                                           |
| wR <sub>2</sub>                                    | 0.0421                                                                           |
| R <sub>1</sub> (all data)                          | 0.0211                                                                           |
| wR <sub>2</sub> (all data)                         | 0.0431                                                                           |

The most pronounced changes in the  $^1\text{H}$  NMR spectrum upon complexation of dihydrodipyrin **23** to give Pd(II) complex **24** were as follows: (1) a upfield chemical shift of the resonance of the 1-methyl group from 2.14 ppm to 1.71 ppm; (2) a downfield chemical shift of  $\text{H}^5$  from 5.98 ppm to 6.30 ppm; and (3) an upfield chemical shift of the pyrrole-H from 7.45 ppm to 6.80 ppm.

## 7. Screening of reaction conditions for self-condensation of dihydrodipyrin **25**

**Table S9.** Summary of reaction conditions from self-condensation of dihydrodipyrin **25**.

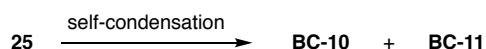

| Entry <sup>a</sup> | solvent                  | TMSOTf (equiv) | DTBP (equiv) | <b>BC-10</b> (%) <sup>b</sup> | <b>BC-11</b> (%) <sup>b</sup> |
|--------------------|--------------------------|----------------|--------------|-------------------------------|-------------------------------|
| 1                  | $\text{CHCl}_3^c$        | 5              | 20           | 1.5                           | 3.3                           |
| 2                  | $\text{CH}_2\text{Cl}_2$ | 5              | 20           | 7.3                           | 14                            |
| 3                  | $\text{DCE}^d$           | 5              | 20           | 8.5                           | 17                            |
| 4                  | DCE                      | 7.5            | 30           | 20                            | 22                            |

<sup>a</sup>All reactions were carried out with 18 mM of **25** (0.002 mmol) at room temperature for 20 h.

<sup>b</sup>Yields were determined by absorption spectroscopy of samples isolated by chromatography. The measured molar absorption coefficients were used. <sup>c</sup>The  $\text{CHCl}_3$  (stabilized with amylenes) was dried over 4Å molecular sieves prior to use. <sup>d</sup>DCE refers to 1,2-dichloroethane.

## 8. Photophysical data for bacteriochlorin BC-2

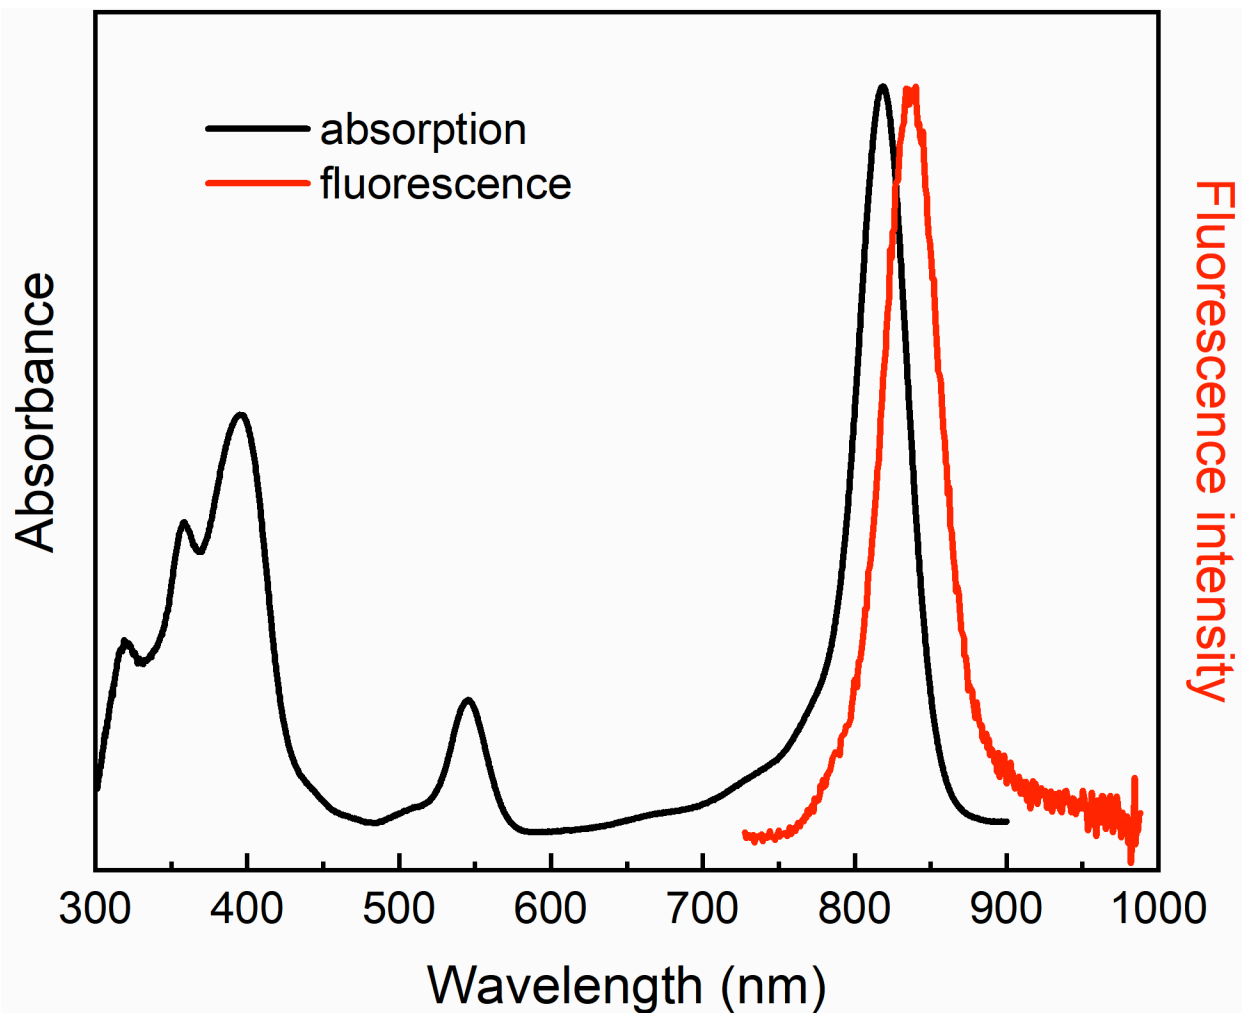

**Figure S4.** Steady-state absorption (black) and fluorescence emission (red) spectra of **BC-2** recorded in toluene at room temperature, normalized at the maximum. Fluorescence emission was taken after excitation at 357 nm. The same fluorescence spectra were obtained using excitation at 530, 548 and 555 nm.

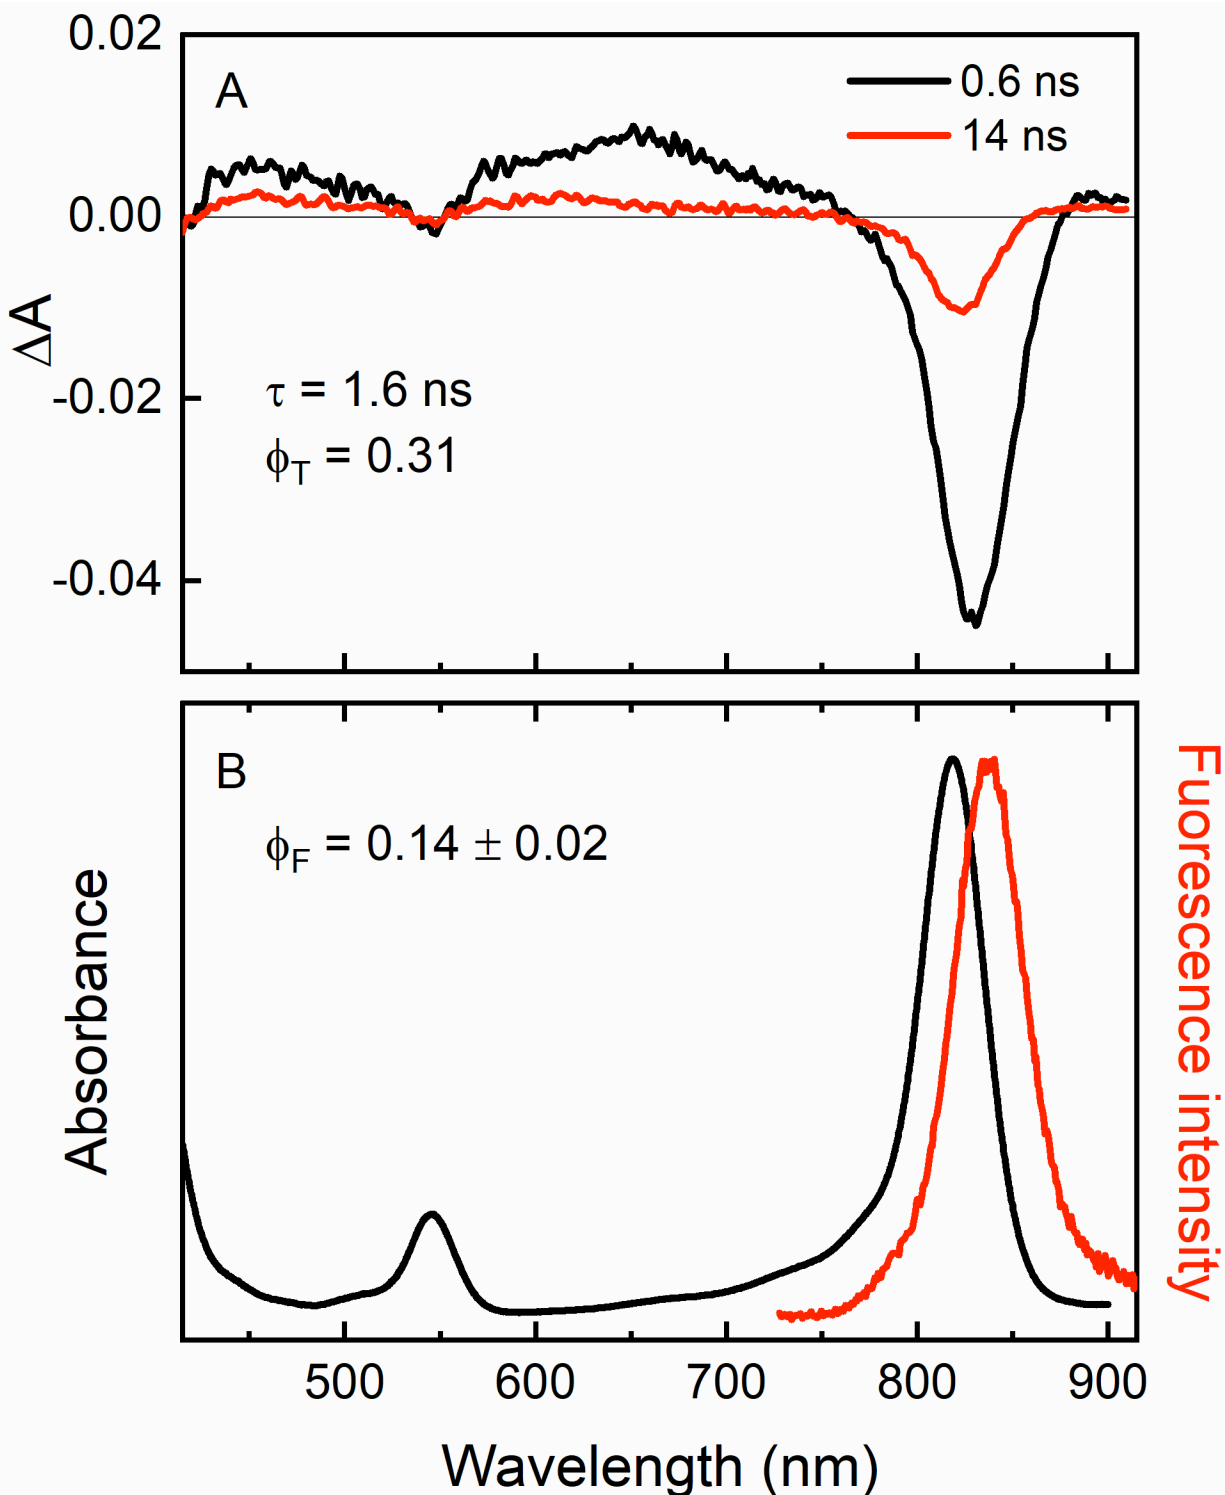

**Figure S5.** Transient absorption spectra recorded at the indicated time delays (A), and normalized static absorbance and fluorescence spectra (B) of **BC-2** taken in toluene at room temperature.  $\tau$ , singlet lifetime;  $\Phi_T$ , triplet yield;  $\Phi_F$ , fluorescence quantum yield. The  $\Phi_F$  value shown is the average value calculated using fluorescence data obtained after excitation at 357, 530, 548 and 555 nm.

## 9. Results of TDDFT calculations

**Table S10.** TDDFT results for **Es-BC** in toluene.<sup>a</sup>

| State          | $\lambda$<br>(nm) | f    | filled<br>MO | empty<br>MO | Coefficient <sup>b</sup> | %  |
|----------------|-------------------|------|--------------|-------------|--------------------------|----|
| S <sub>1</sub> | 763               | 0.51 | H            | L           | 0.963                    | 93 |
|                |                   |      | H-1          | L+1         | -0.225                   | 5  |
| S <sub>2</sub> | 551               | 0.19 | H-1          | L           | 0.918                    | 84 |
|                |                   |      | H            | L+1         | 0.393                    | 15 |
| S <sub>3</sub> | 351               | 1.13 | H            | L+1         | 0.920                    | 85 |
|                |                   |      | H-1          | L           | -0.368                   | 14 |
| S <sub>4</sub> | 321               | 1.56 | H-1          | L+1         | 0.946                    | 90 |
|                |                   |      | H-1          | L           | 0.237                    | 6  |

<sup>a</sup>H = HOMO and L = LUMO. <sup>b</sup>Coefficient for the configuration, obtained by multiplying the value given from Gaussian by the square root of two. The percent contribution to the state is obtained by squaring the coefficient; in some cases a small contribution from an ‘emissive’ contribution involving the same orbitals was subtracted to obtain the percentage shown.

**Table S11.** TDDFT results for **Phen-BC** in toluene.<sup>a</sup>

| State          | $\lambda$<br>(nm) | f    | filled<br>MO | empty<br>MO | Coefficient <sup>b</sup> | %  |
|----------------|-------------------|------|--------------|-------------|--------------------------|----|
| S <sub>1</sub> | 973               | 1.0  | H            | L           | 0.954                    | 91 |
|                |                   |      | H-1          | L           | 0.208                    | 4  |
|                |                   |      | H-1          | L+1         | -0.160                   | 3  |
| S <sub>2</sub> | 682               | 0.32 | H-1          | L           | 0.909                    | 83 |
|                |                   |      | H            | L+1         | 0.309                    | 10 |
|                |                   |      | H            | L           | -0.218                   | 5  |
| S <sub>3</sub> | 417               | 0.06 | H-2          | L           | 0.901                    | 81 |
|                |                   |      | H            | L+2         | 0.342                    | 12 |
| S <sub>4</sub> | 406               | 0.53 | H            | L+1         | 0.899                    | 81 |
|                |                   |      | H-1          | L           | -0.330                   | 11 |
|                |                   |      | H            | L+2         | -0.145                   | 2  |
| S <sub>6</sub> | 376               | 0.88 | H-3          | L           | 0.723                    | 52 |
|                |                   |      | H-1          | L+1         | 0.535                    | 29 |
|                |                   |      | H            | L+3         | 0.226                    | 5  |
|                |                   |      | H-2          | L+2         | 0.186                    | 3  |
|                |                   |      | H            | L+1         | 0.156                    | 2  |

<sup>a</sup>H = HOMO and L = LUMO. <sup>b</sup>Coefficient for the configuration, obtained by multiplying the value given from Gaussian by the square root of two. The percent contribution to the state is obtained by squaring the coefficient; in some cases a small contribution from an ‘emissive’ contribution involving the same orbitals was subtracted to obtain the percentage shown.

**Table S12.** TDDFT results for **Benz-BC** in toluene.<sup>a</sup>

| State          | $\lambda$<br>(nm) | f    | filled<br>MO | empty<br>MO | Coefficient <sup>b</sup> | %  |
|----------------|-------------------|------|--------------|-------------|--------------------------|----|
| S <sub>1</sub> | 1056              | 0.38 | H            | L           | 0.962                    | 93 |
|                |                   |      | H-1          | L           | 0.147                    | 2  |
|                |                   |      | H-1          | L+1         | 0.148                    | 2  |
| S <sub>2</sub> | 704               | 0.41 | H-1          | L           | 0.947                    | 90 |
|                |                   |      | H            | L+1         | -0.248                   | 6  |
| S <sub>4</sub> | 417               | 0.23 | H            | L+1         | 0.764                    | 58 |
|                |                   |      | H-3          | L           | 0.582                    | 34 |
|                |                   |      | H-2          | L+2         | -0.155                   | 2  |
| S <sub>5</sub> | 371               | 1.4  | H-3          | L           | 0.656                    | 43 |
|                |                   |      | H            | L+1         | -0.526                   | 28 |
|                |                   |      | H-1          | L+1         | -0.435                   | 19 |
|                |                   |      | H-1          | L           | -0.234                   | 5  |
| S <sub>7</sub> | 339               | 1.4  | H-1          | L+1         | 0.842                    | 71 |
|                |                   |      | H-3          | L           | 0.374                    | 14 |
|                |                   |      | H            | L+1         | -0.230                   | 5  |
|                |                   |      | H            | L           | -0.167                   | 3  |

<sup>a</sup>H = HOMO and L = LUMO. <sup>b</sup>Coefficient for the configuration, obtained by multiplying the value given from Gaussian by the square root of two. The percent contribution to the state is obtained by squaring the coefficient; in some cases a small contribution from an 'emissive' contribution involving the same orbitals was subtracted to obtain the percentage shown.

## 10. References

- (S1) T. D. Lash, P. Chandrasekar, A. T. Osuma, S. T. Chaney and J. D. Spence, *J. Org. Chem.*, 1998, **63**, 8455–8469.
- (S2) X.-H. Liu, H. Park, J.-H. Hu, Y. Hu, Q.-L. Zhang, B.-L. Wang, B. Sun, K.-S. Yeung, F.-L. Zhang and J.-Q. Yu, *J. Am. Chem. Soc.*, 2017, **139**, 888–896.
- (S3) P. Magnus, W. Danikiewicz, T. Katoh, J. C. Huffman and K. Folting, *J. Am. Chem. Soc.*, 1990, **112**, 2465–2468.
- (S4) C. W. Miller, E. S. Jönsson, C. E. Hoyle, K. Viswanathan and E. J. Valente, *J. Phys. Chem. B*, 2001, **105**, 2707–2717)
- (S5) M. G. H. Vicente, A. C. Tomé, A. Walter and J. A. S. Cavaleiro, *Tetrahedron Lett.*, 1997, **38**, 3639–3642.
- (S6) K. D. Johnstone, W. A. Pearce and S. M. Pyke, *J. Porphyrins Phthalocyanines*, 2002, **6**, 661–672.
- (S7) D. J. Sall, D. L. Bailey, J. A. Bastian, J. A. Buben, N. Y. Chirgadze, A. C. Clemens-Smith, M. L. Denney, M. J. Fisher, D. D. Giera, D. S. Gifford-Moore, R. W. Harper, L. M. Johnson, V. J. Klimkowski, T. J. Kohn, H.-S. Lin, J. R. McCowan, A. D. Palkowitz, M. E. Richett, G. F. Smith, D. W. Snyder, K. Takeuchi, J. E. Toth and M. Zhang, *J. Med. Lett.*, 2000, **43**, 649–663.
- (S8) A. Chucholowski, J. Fingerle, N. Iberg, H. P. Marki, R. Müller, M. Pech, M. Rouge, G. Schmid, T. Tschopp and H. P. Wessel, *Eur. Pat. Appl.*, 663391.
- (S9) A. de Meijere, Z. Z. Song, A. Lansky, S. Hyuda, K. Rauch, M. Noltemeyer, B. König and B. Knieriem, *Eur. J. Org. Chem.*, 1998, 2289–2299.
- (S10) J. D. Douglas, G. Griffini, T. W. Holcombe, E. P. Young, O. P. Lee, M. S. Chen and J. M. J. Fréchet, *Macromolecules*, 2012, **45**, 4069–4074.



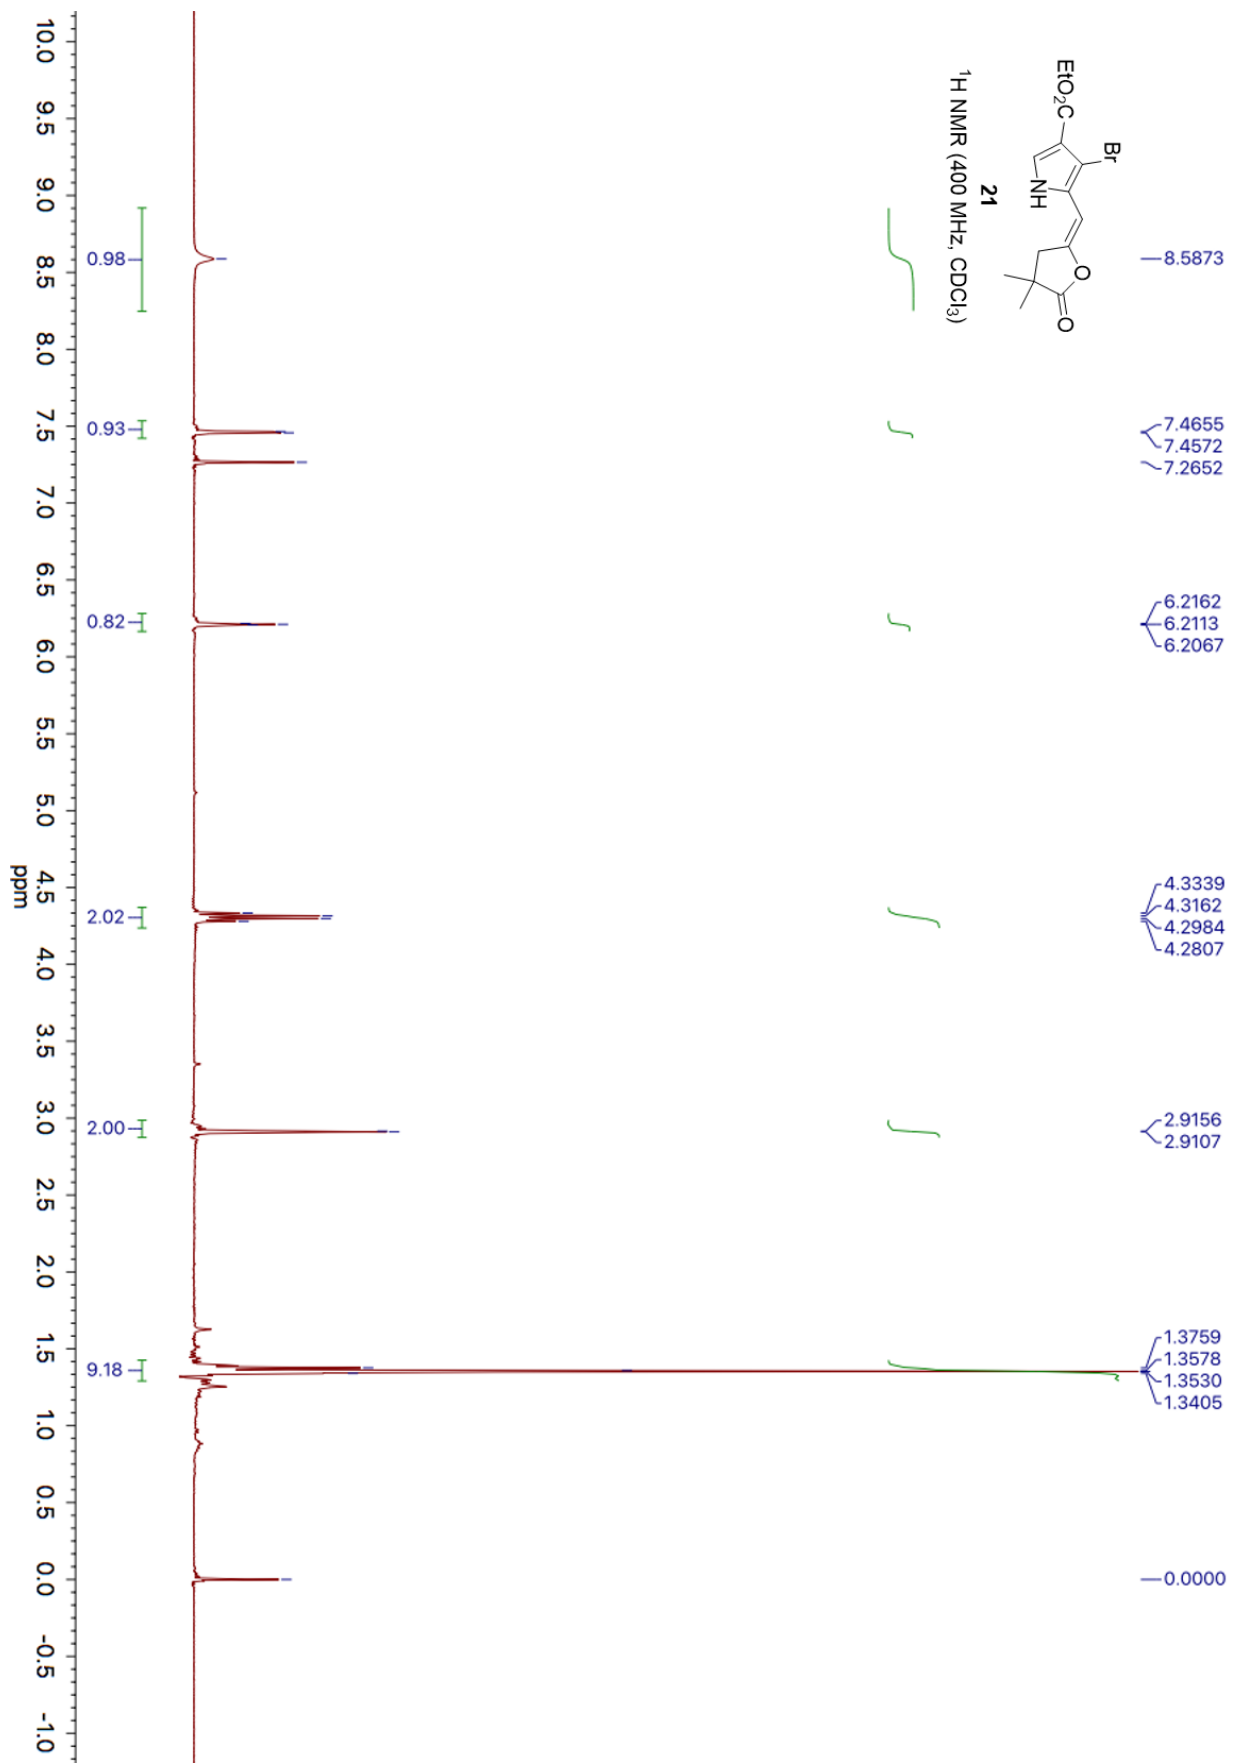

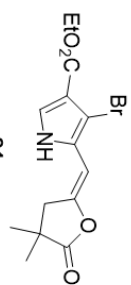

<sup>13</sup>C NMR (100 MHz, CDCl<sub>3</sub>)

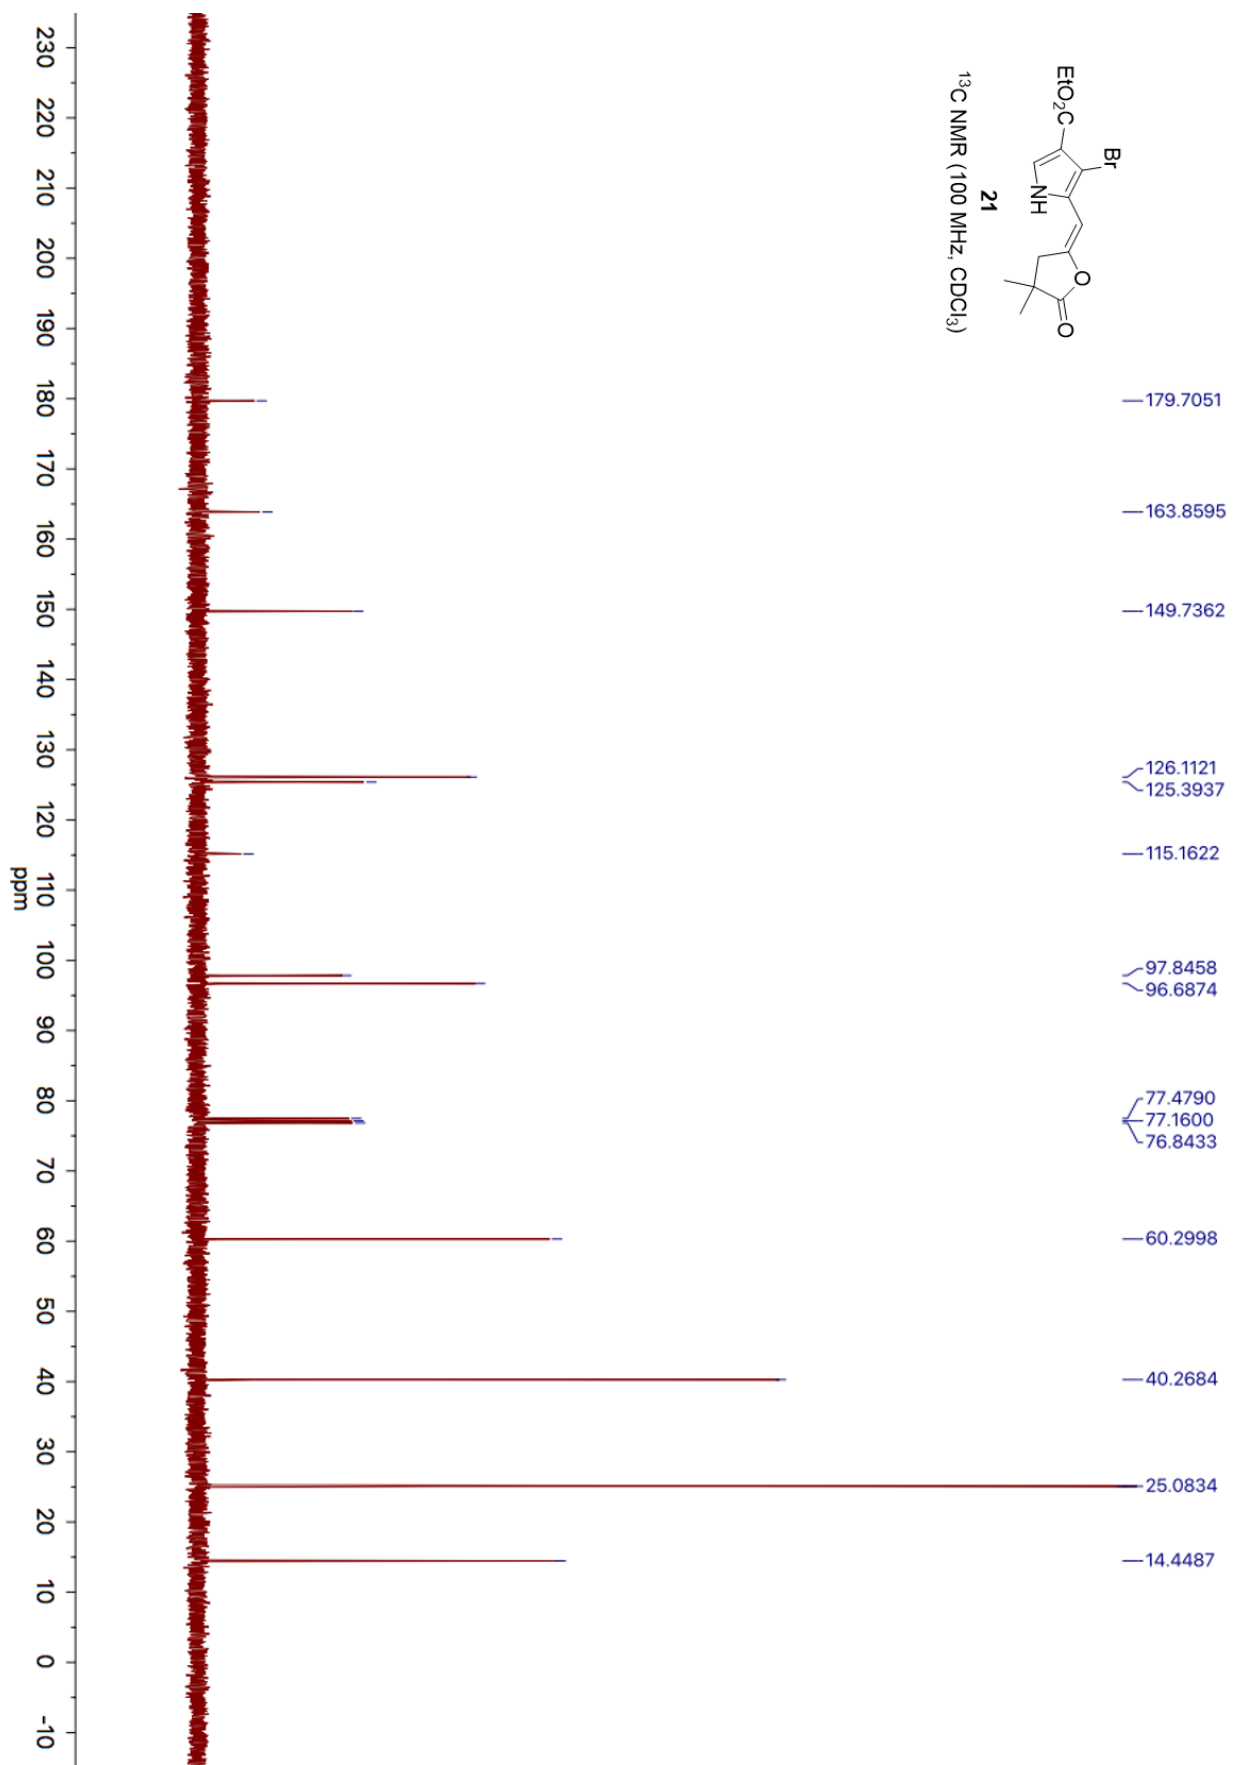

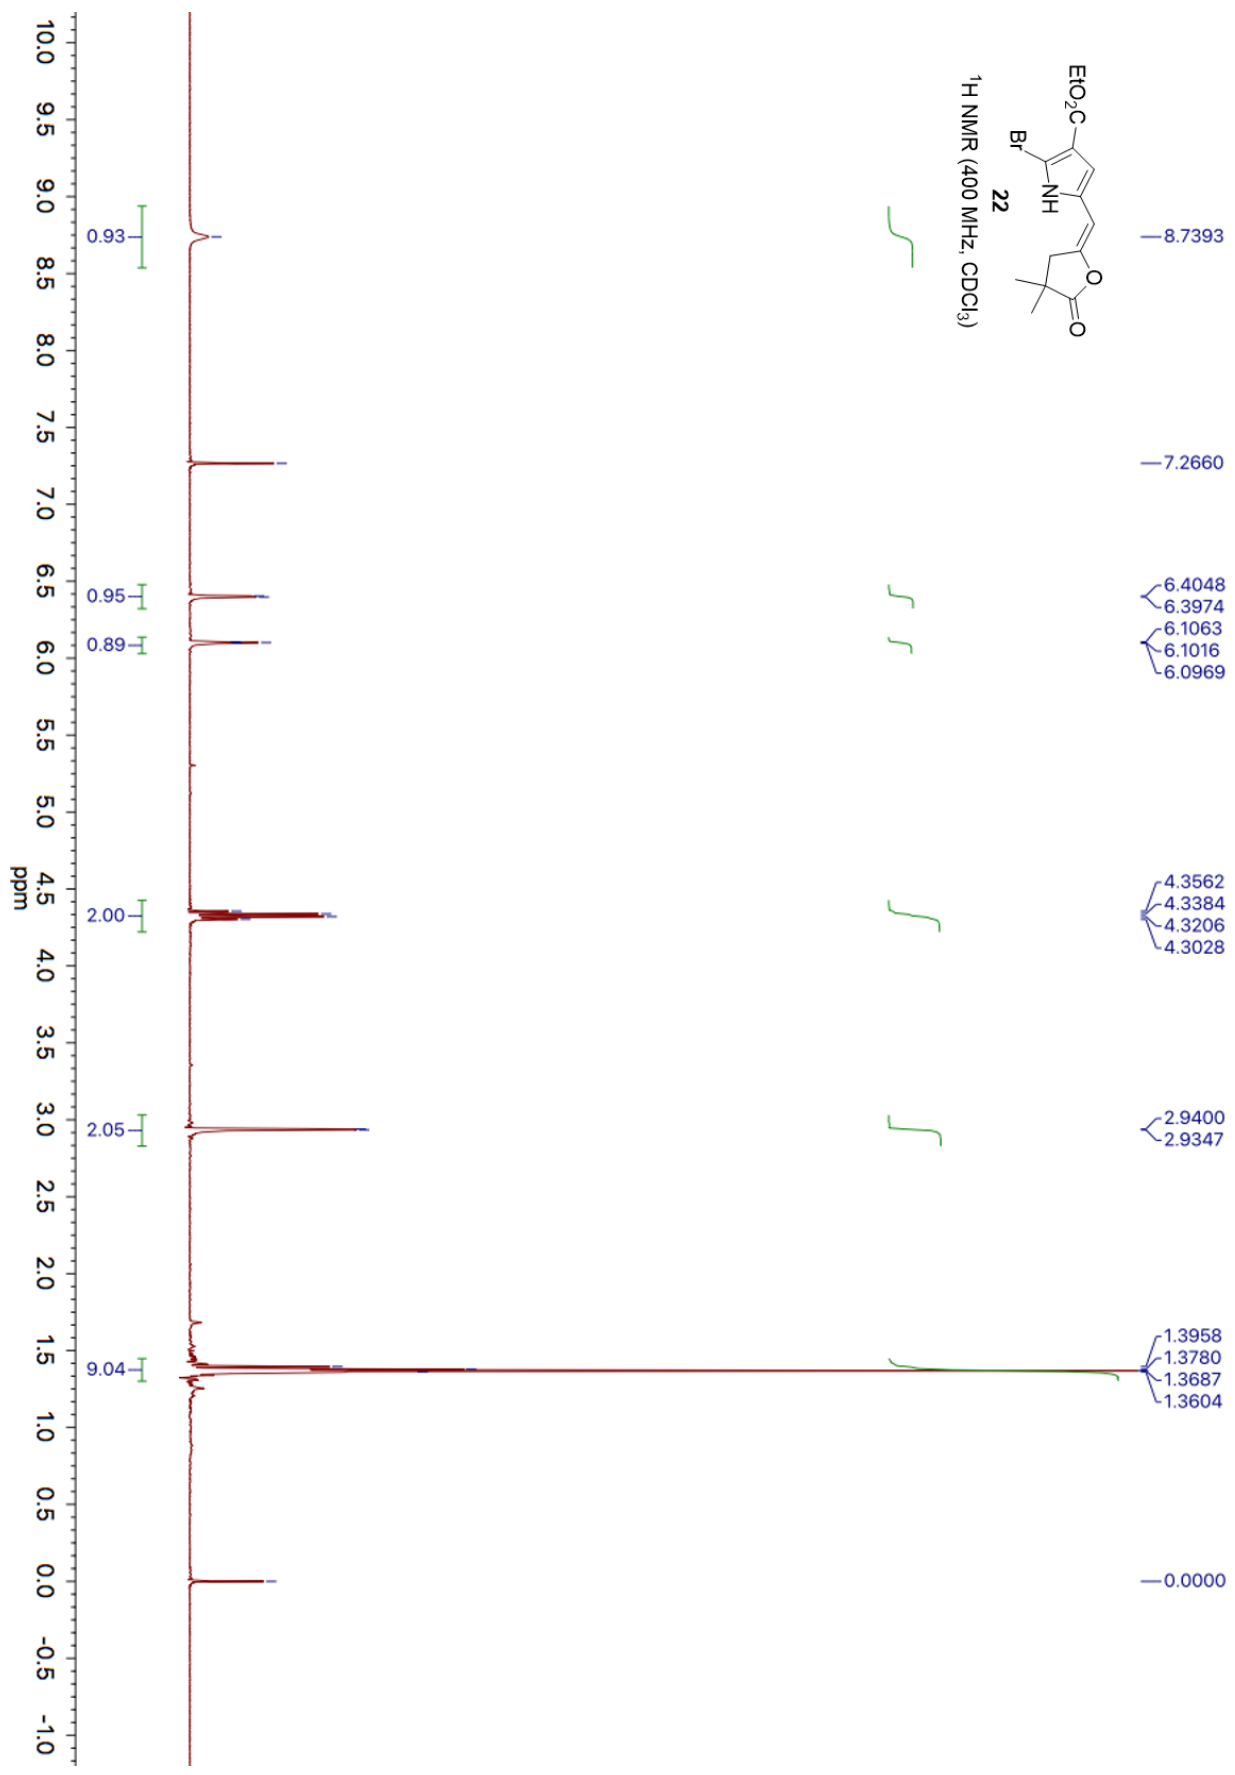

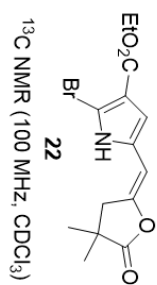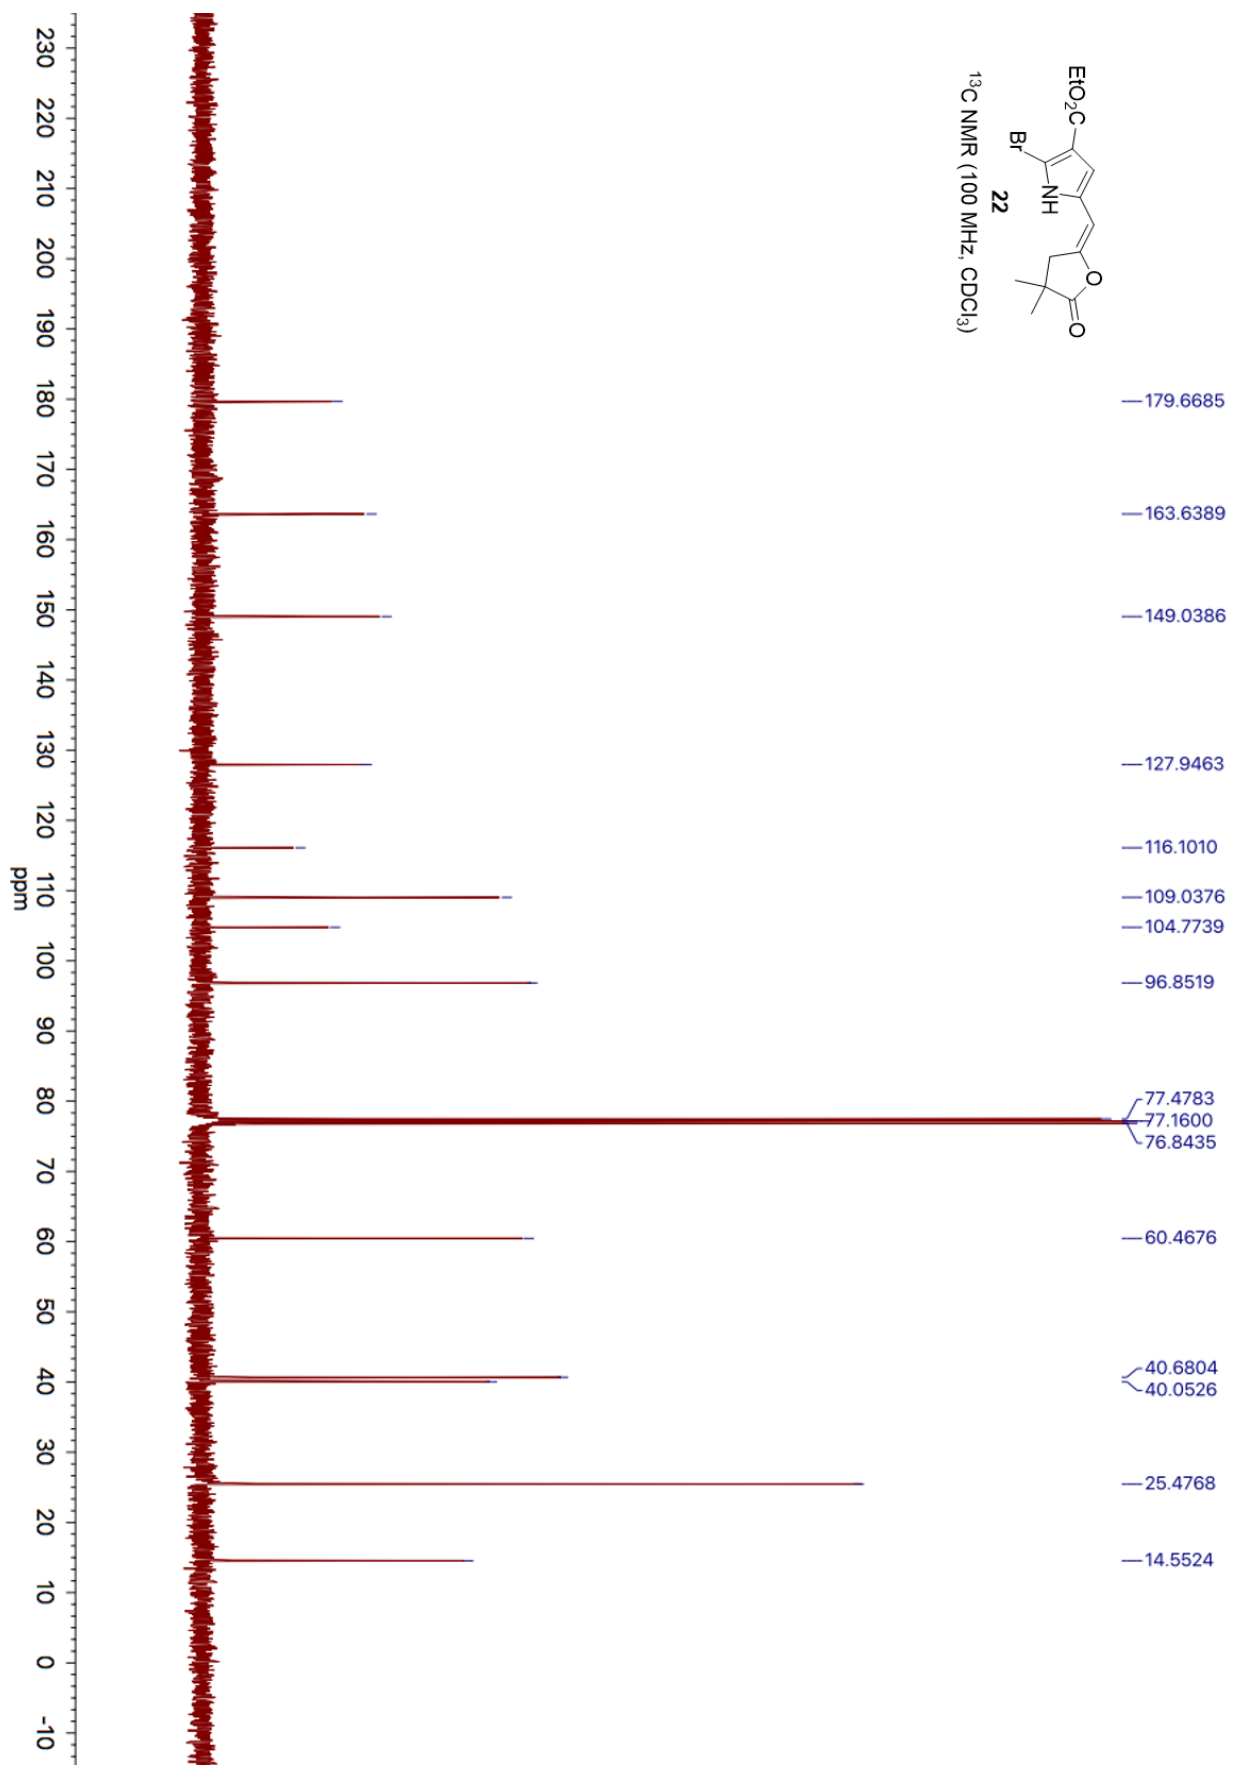

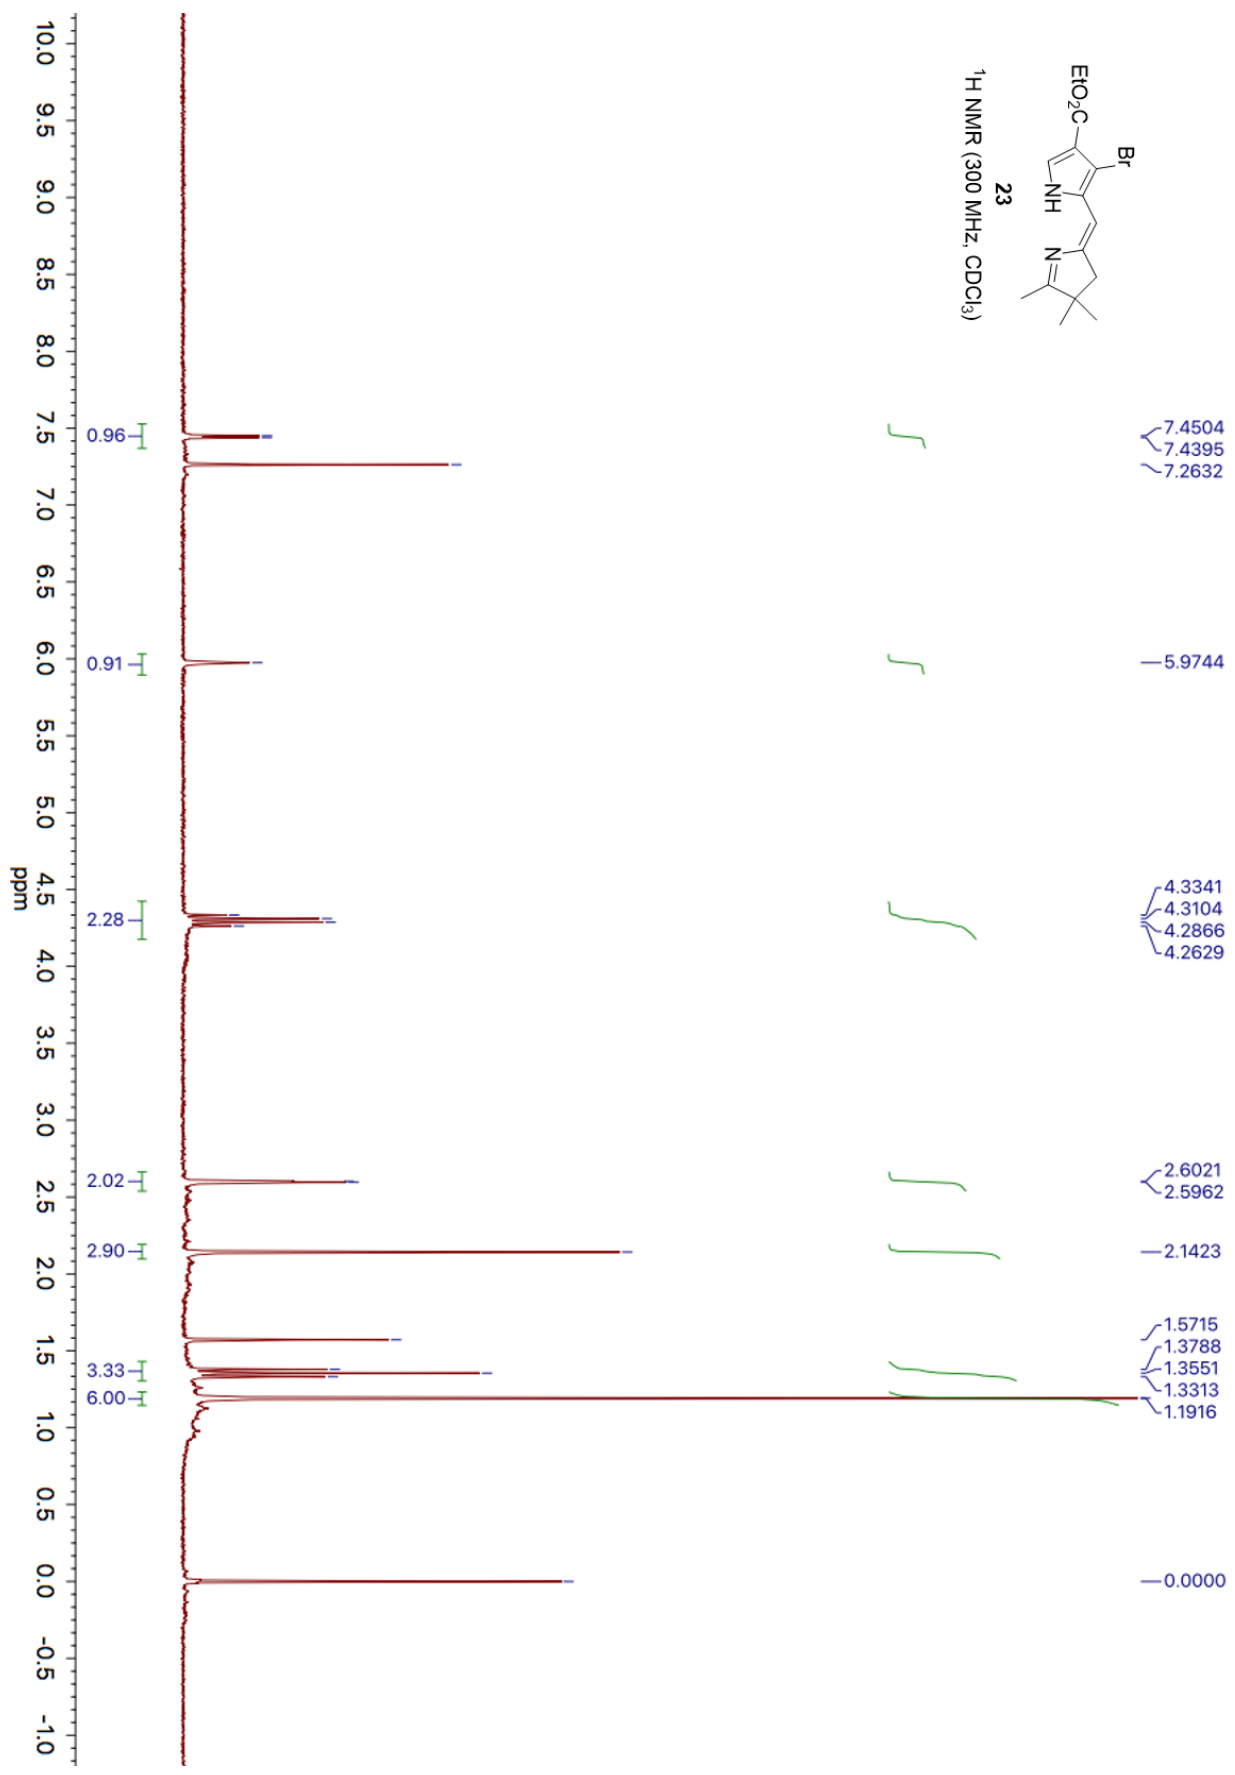

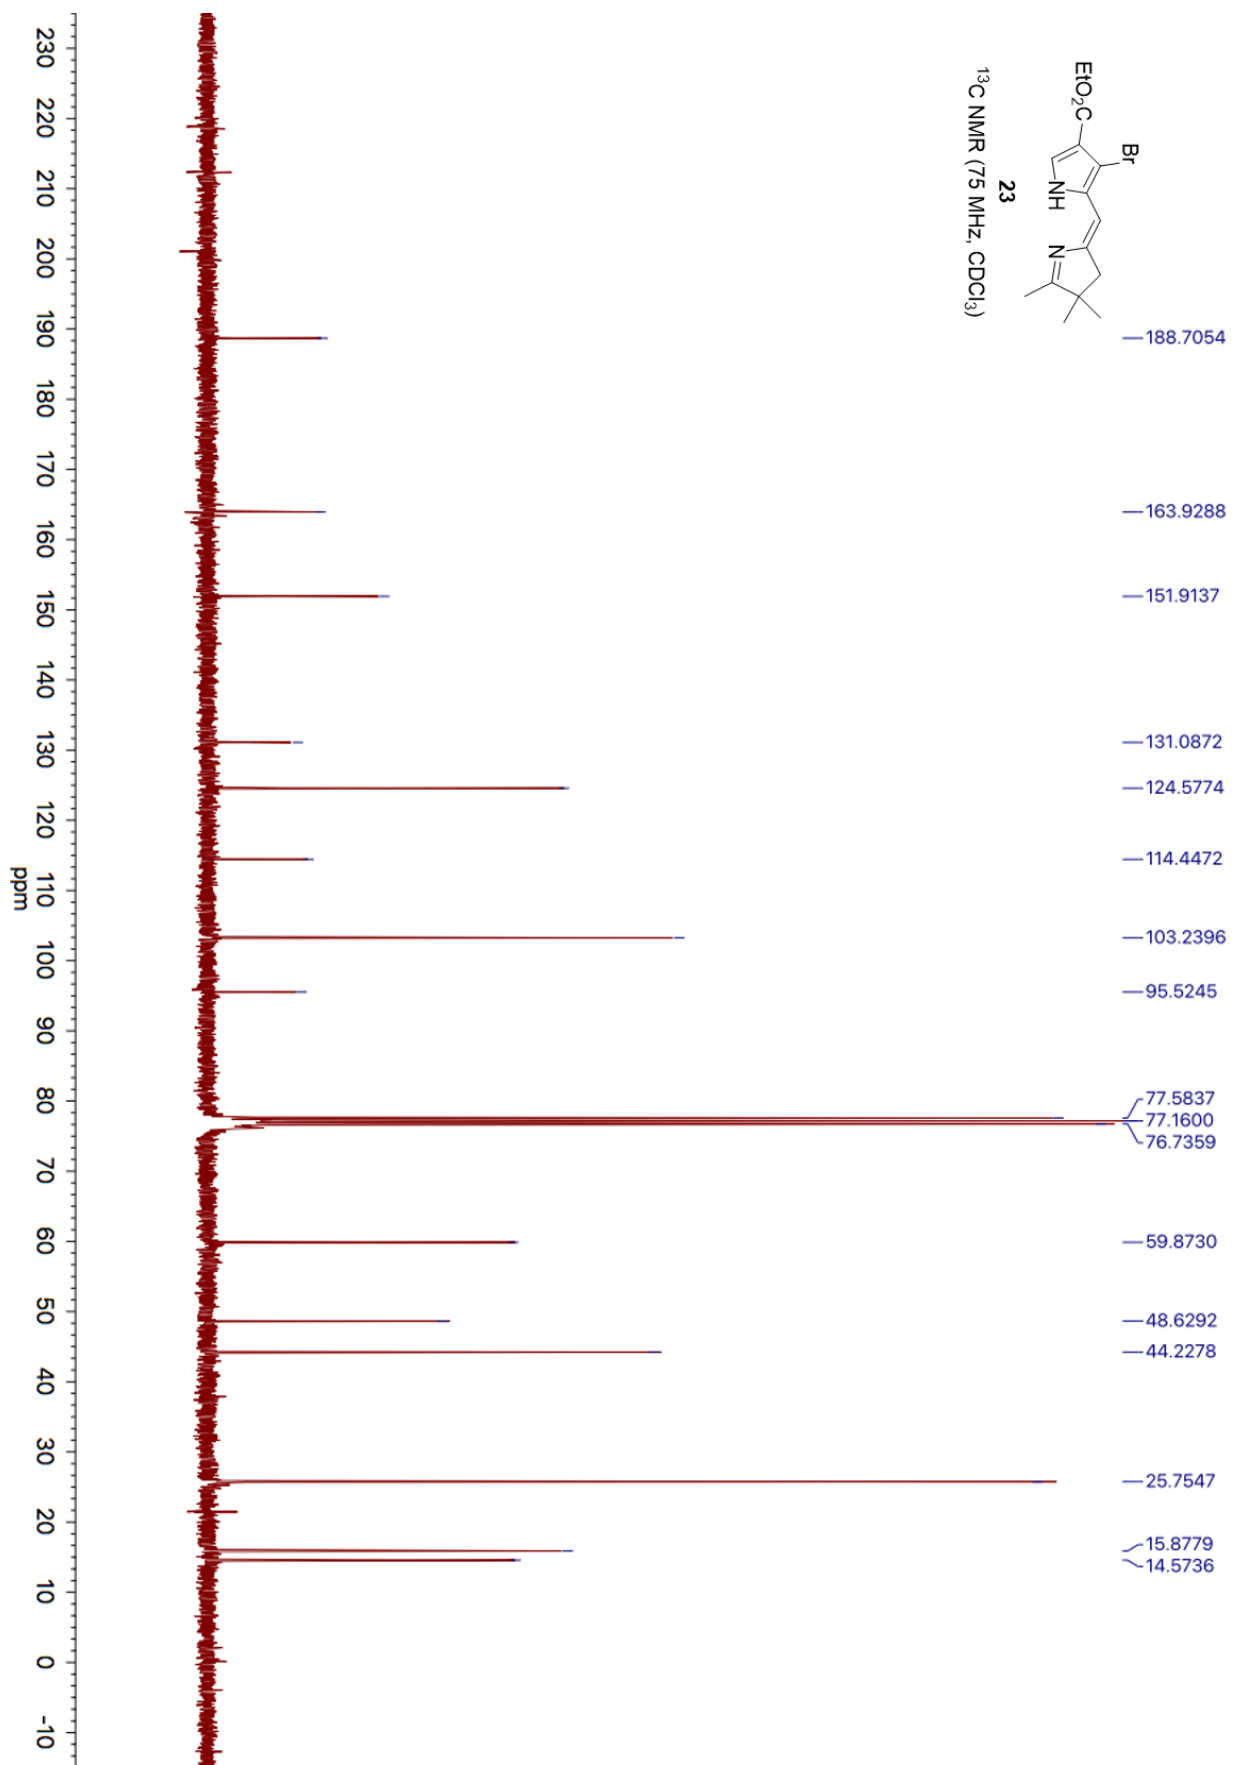

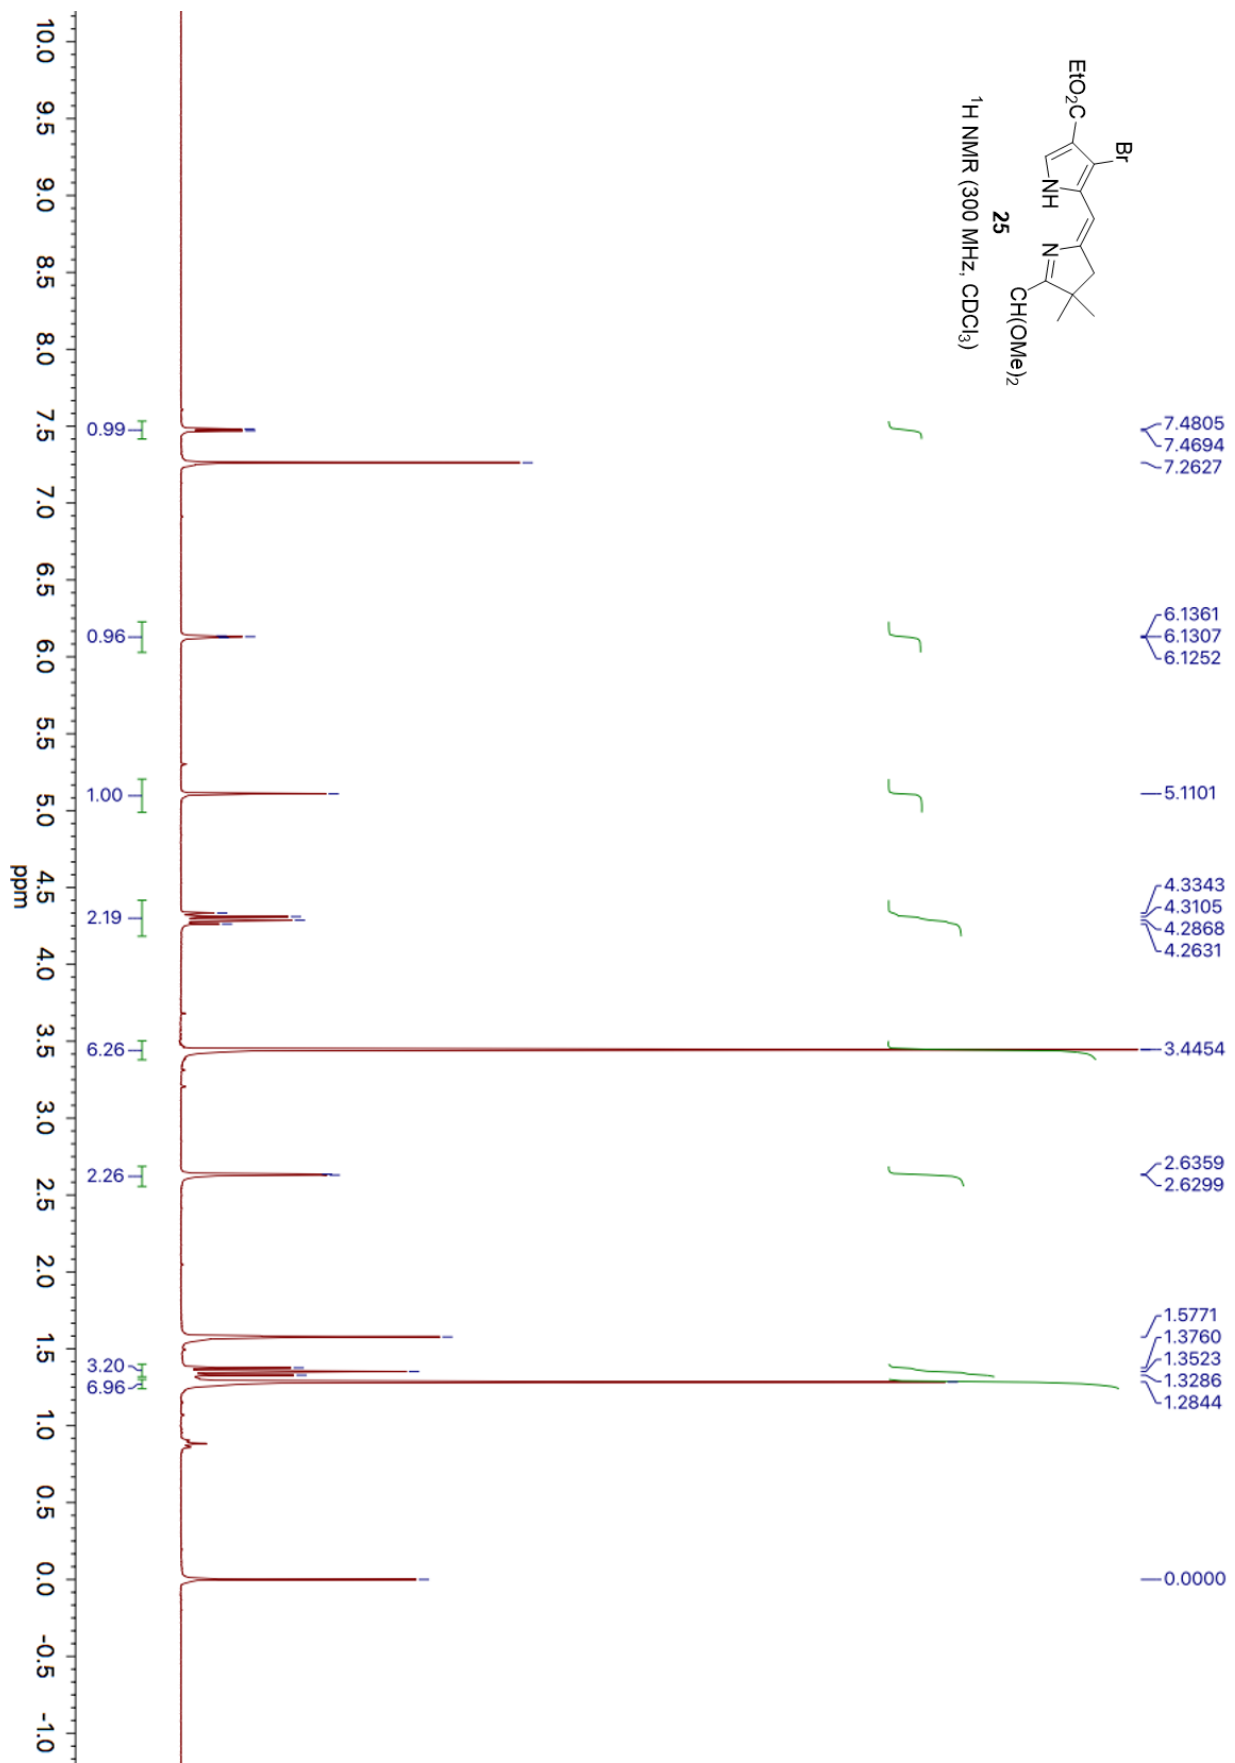

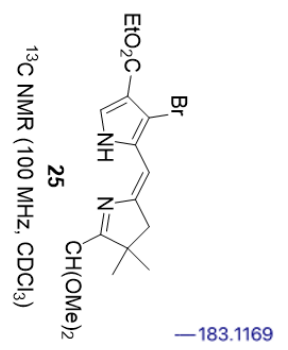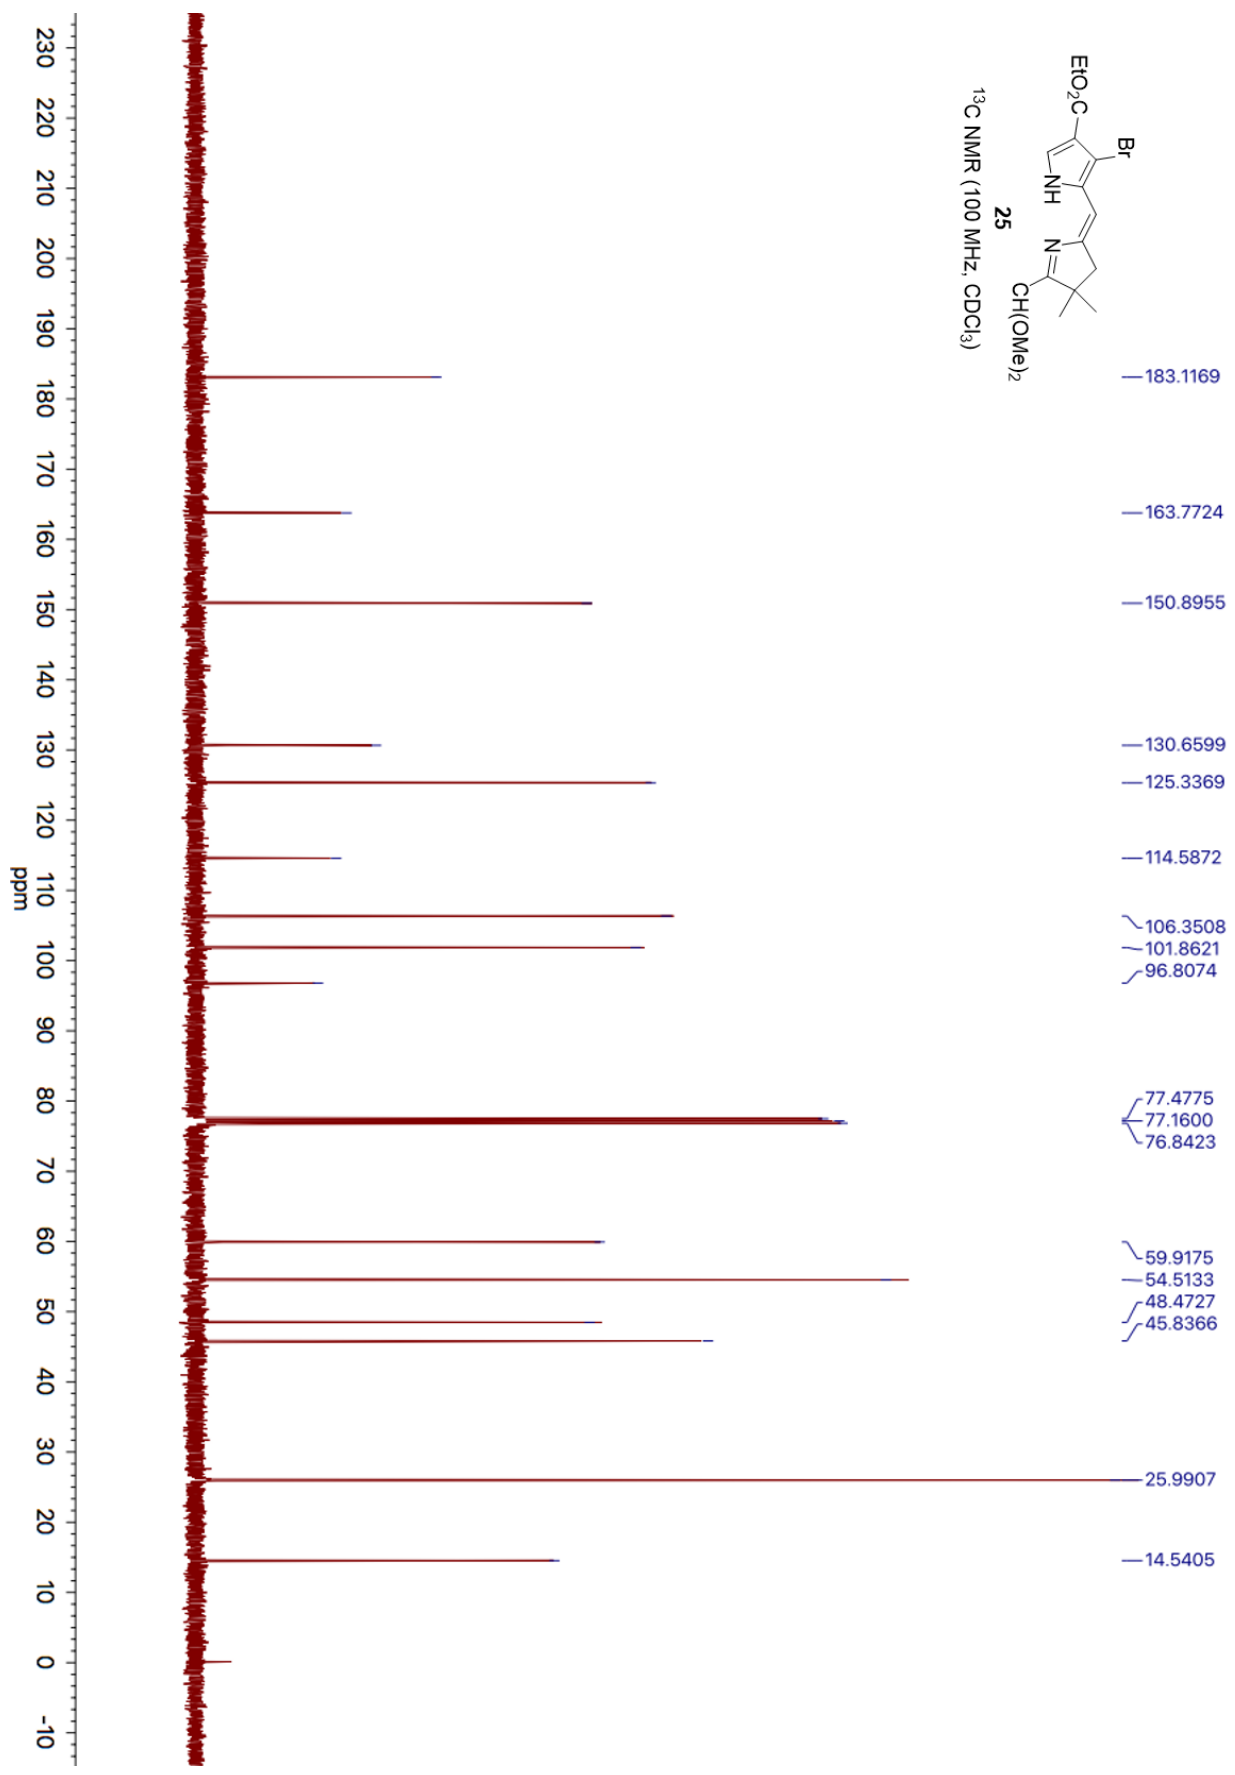



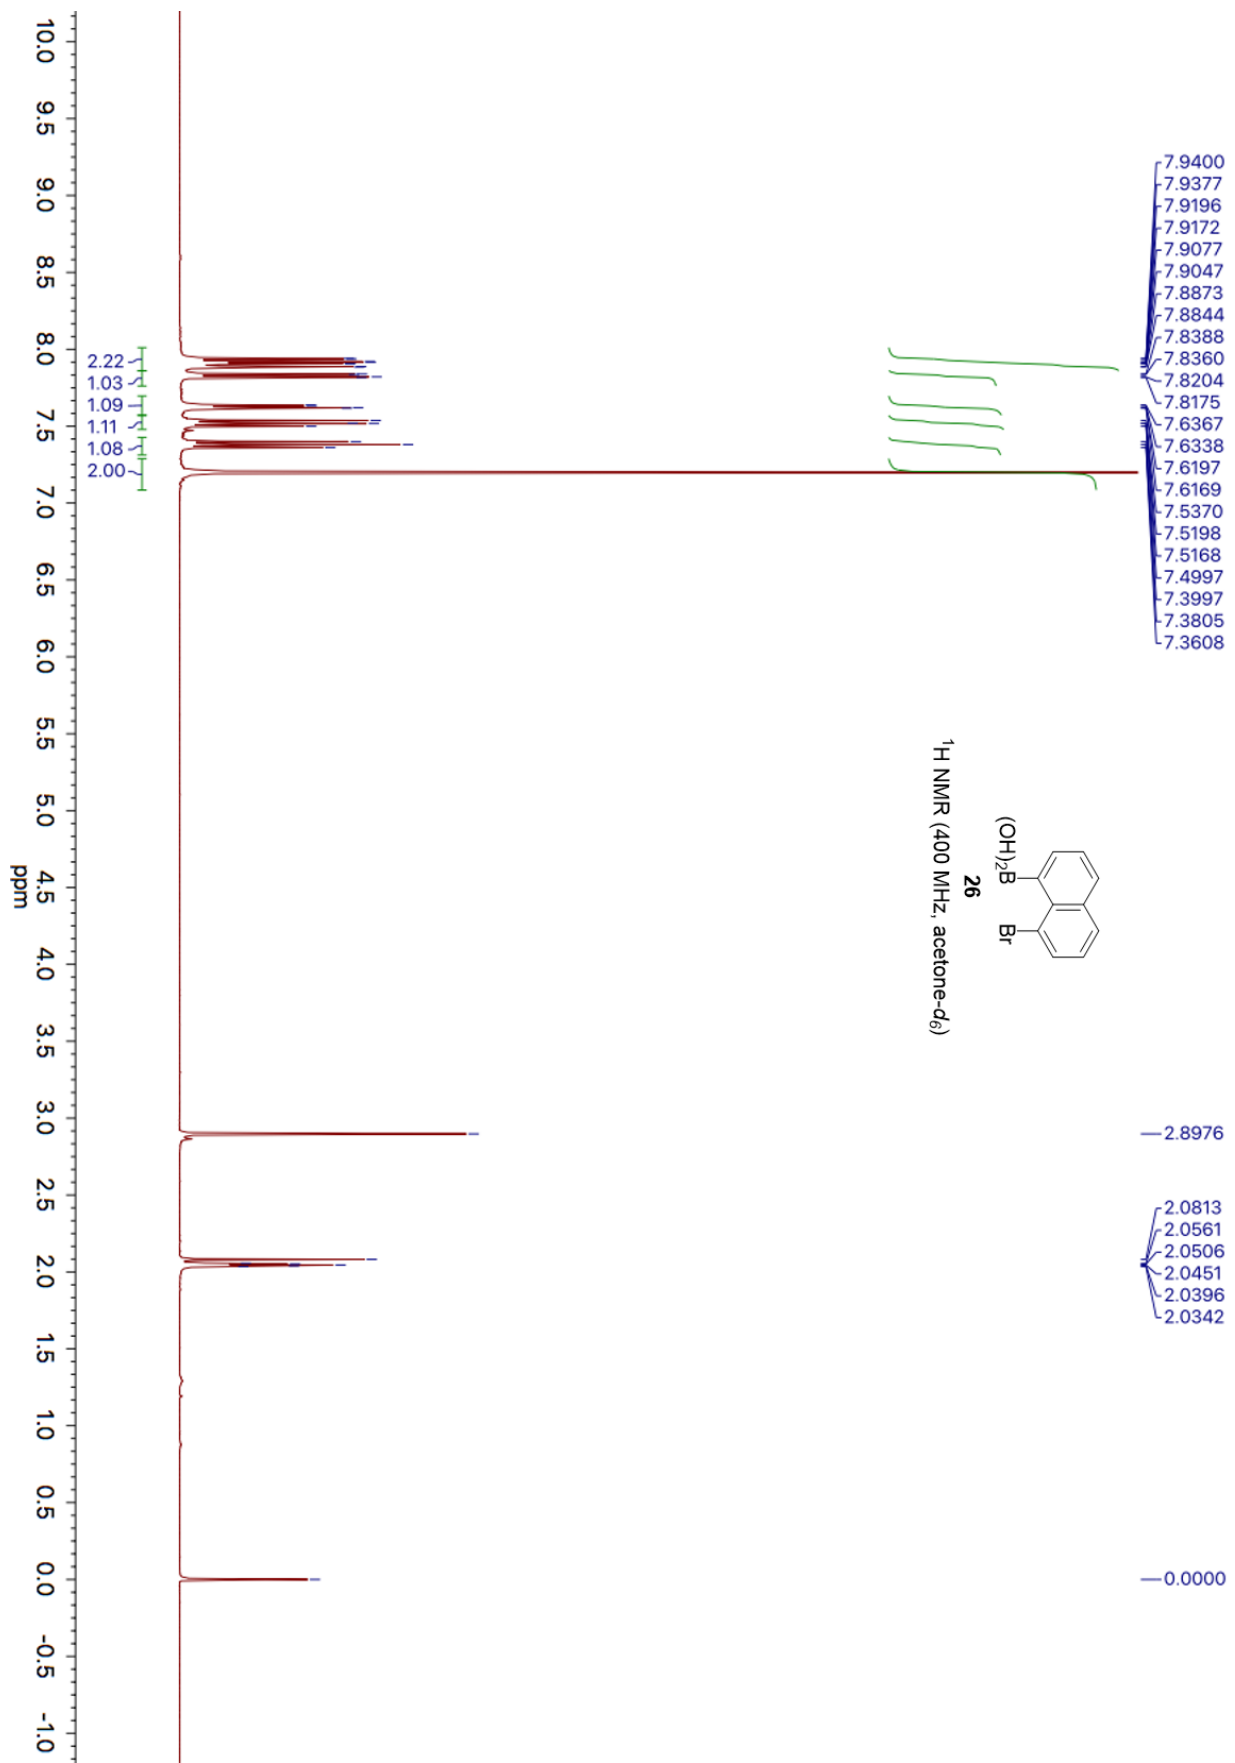

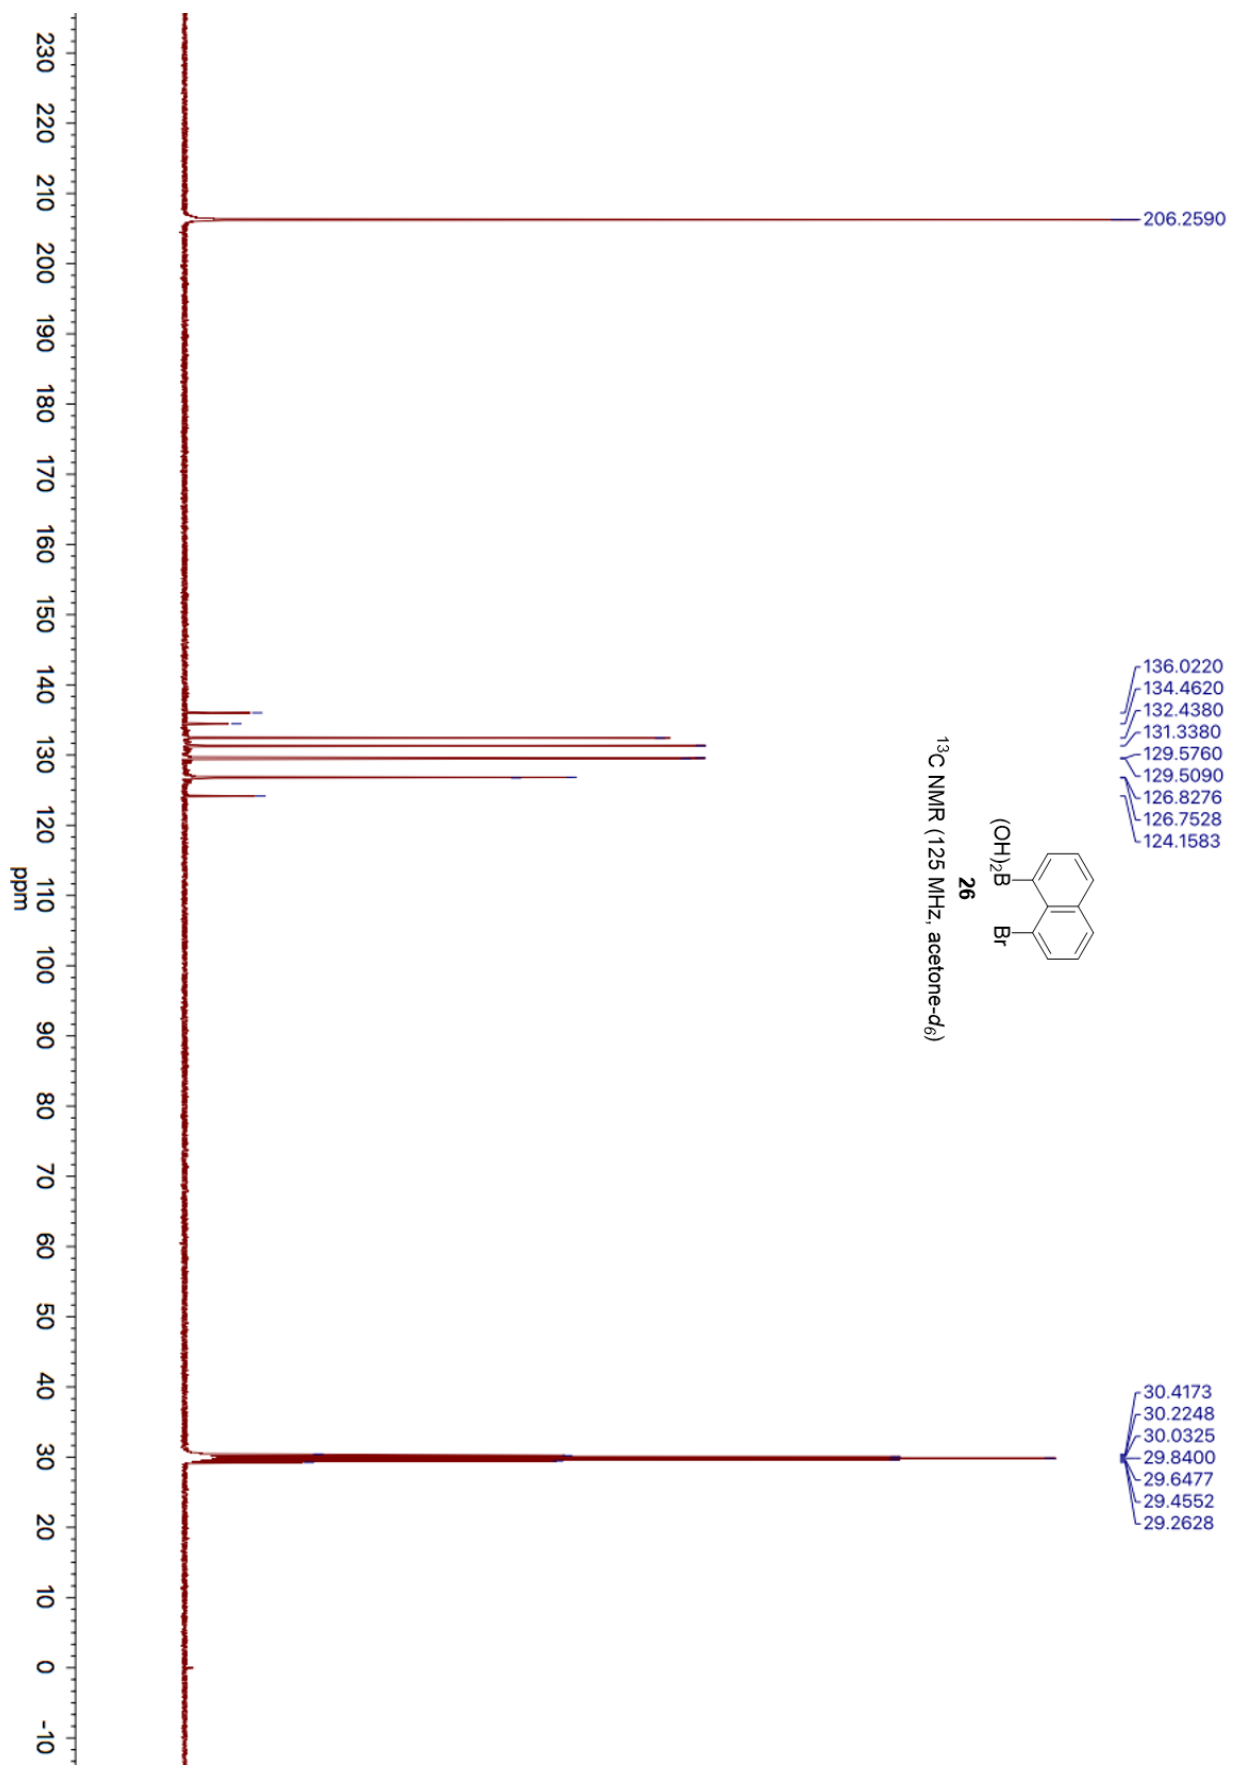

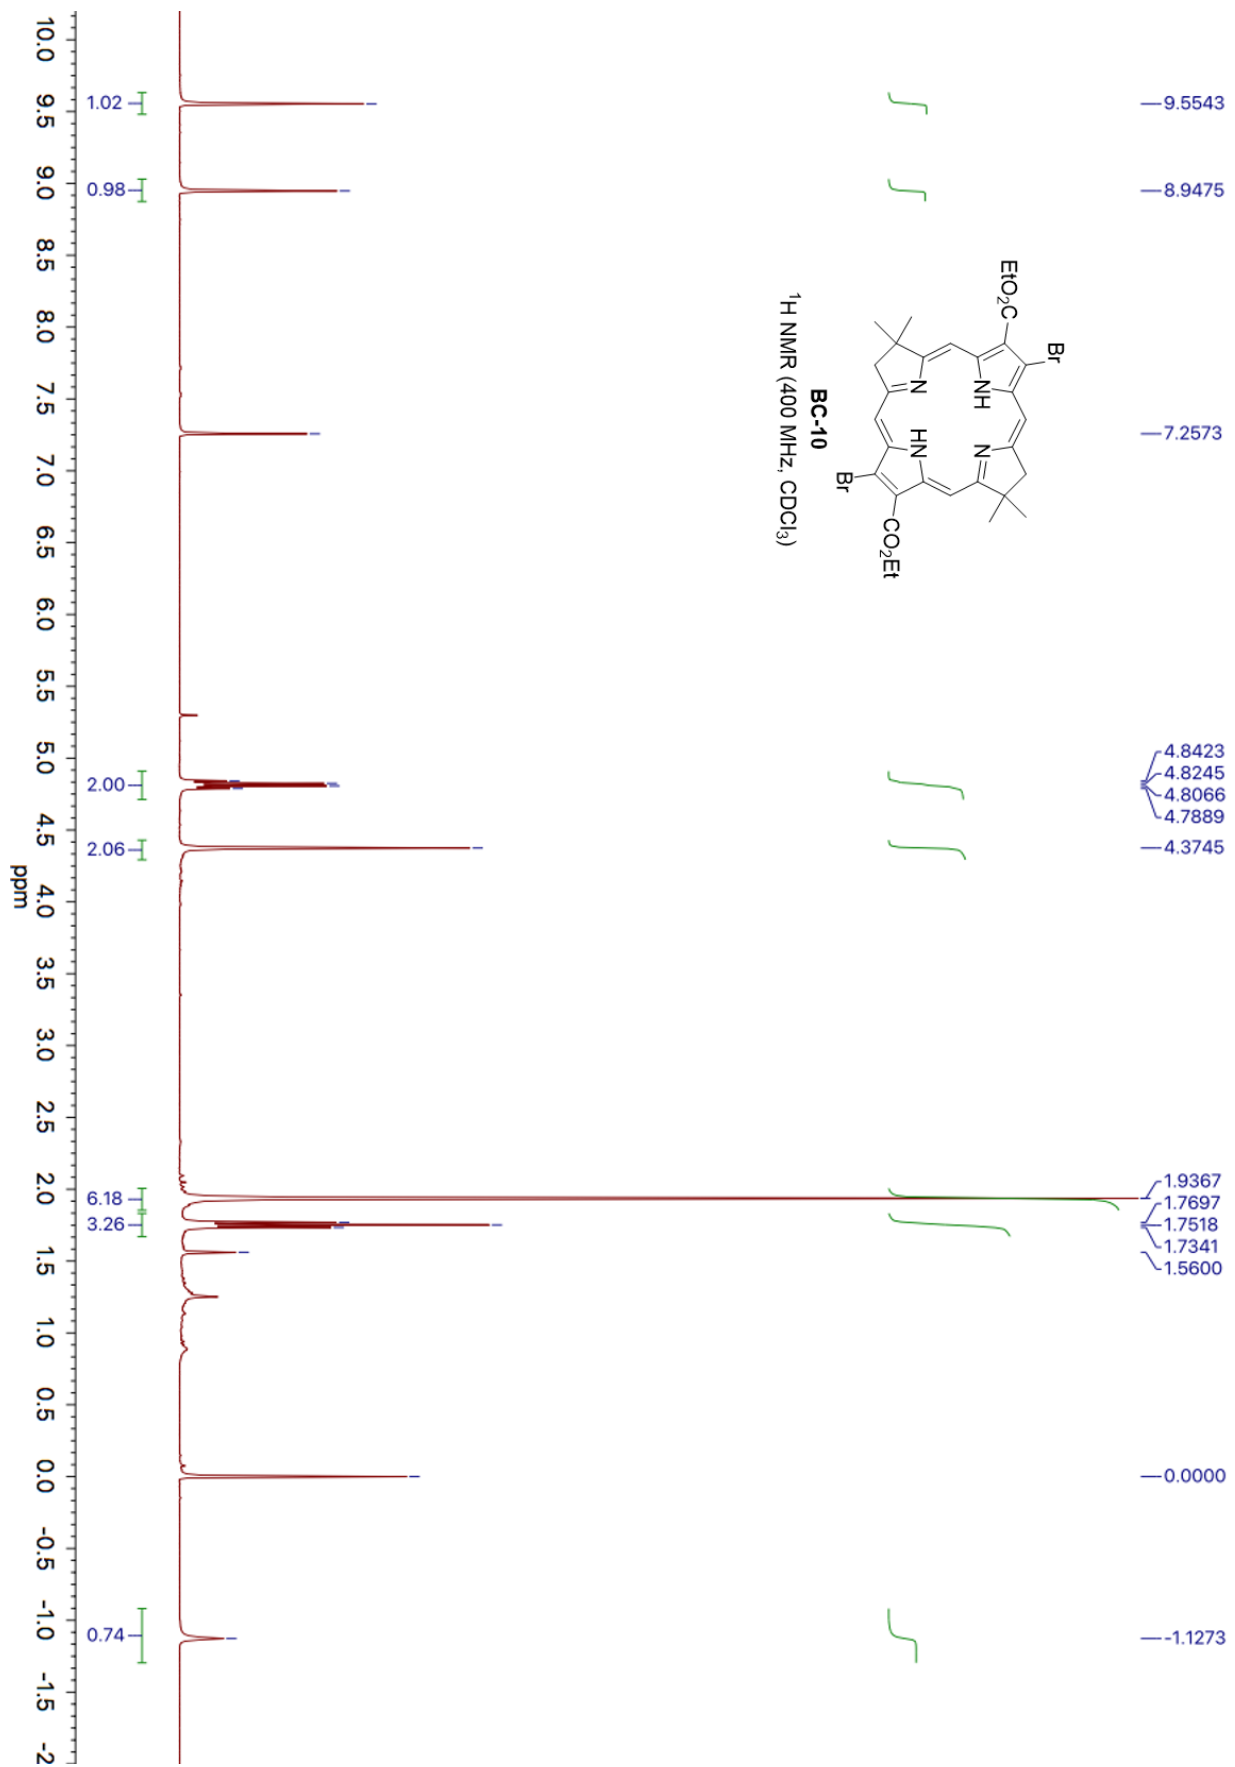

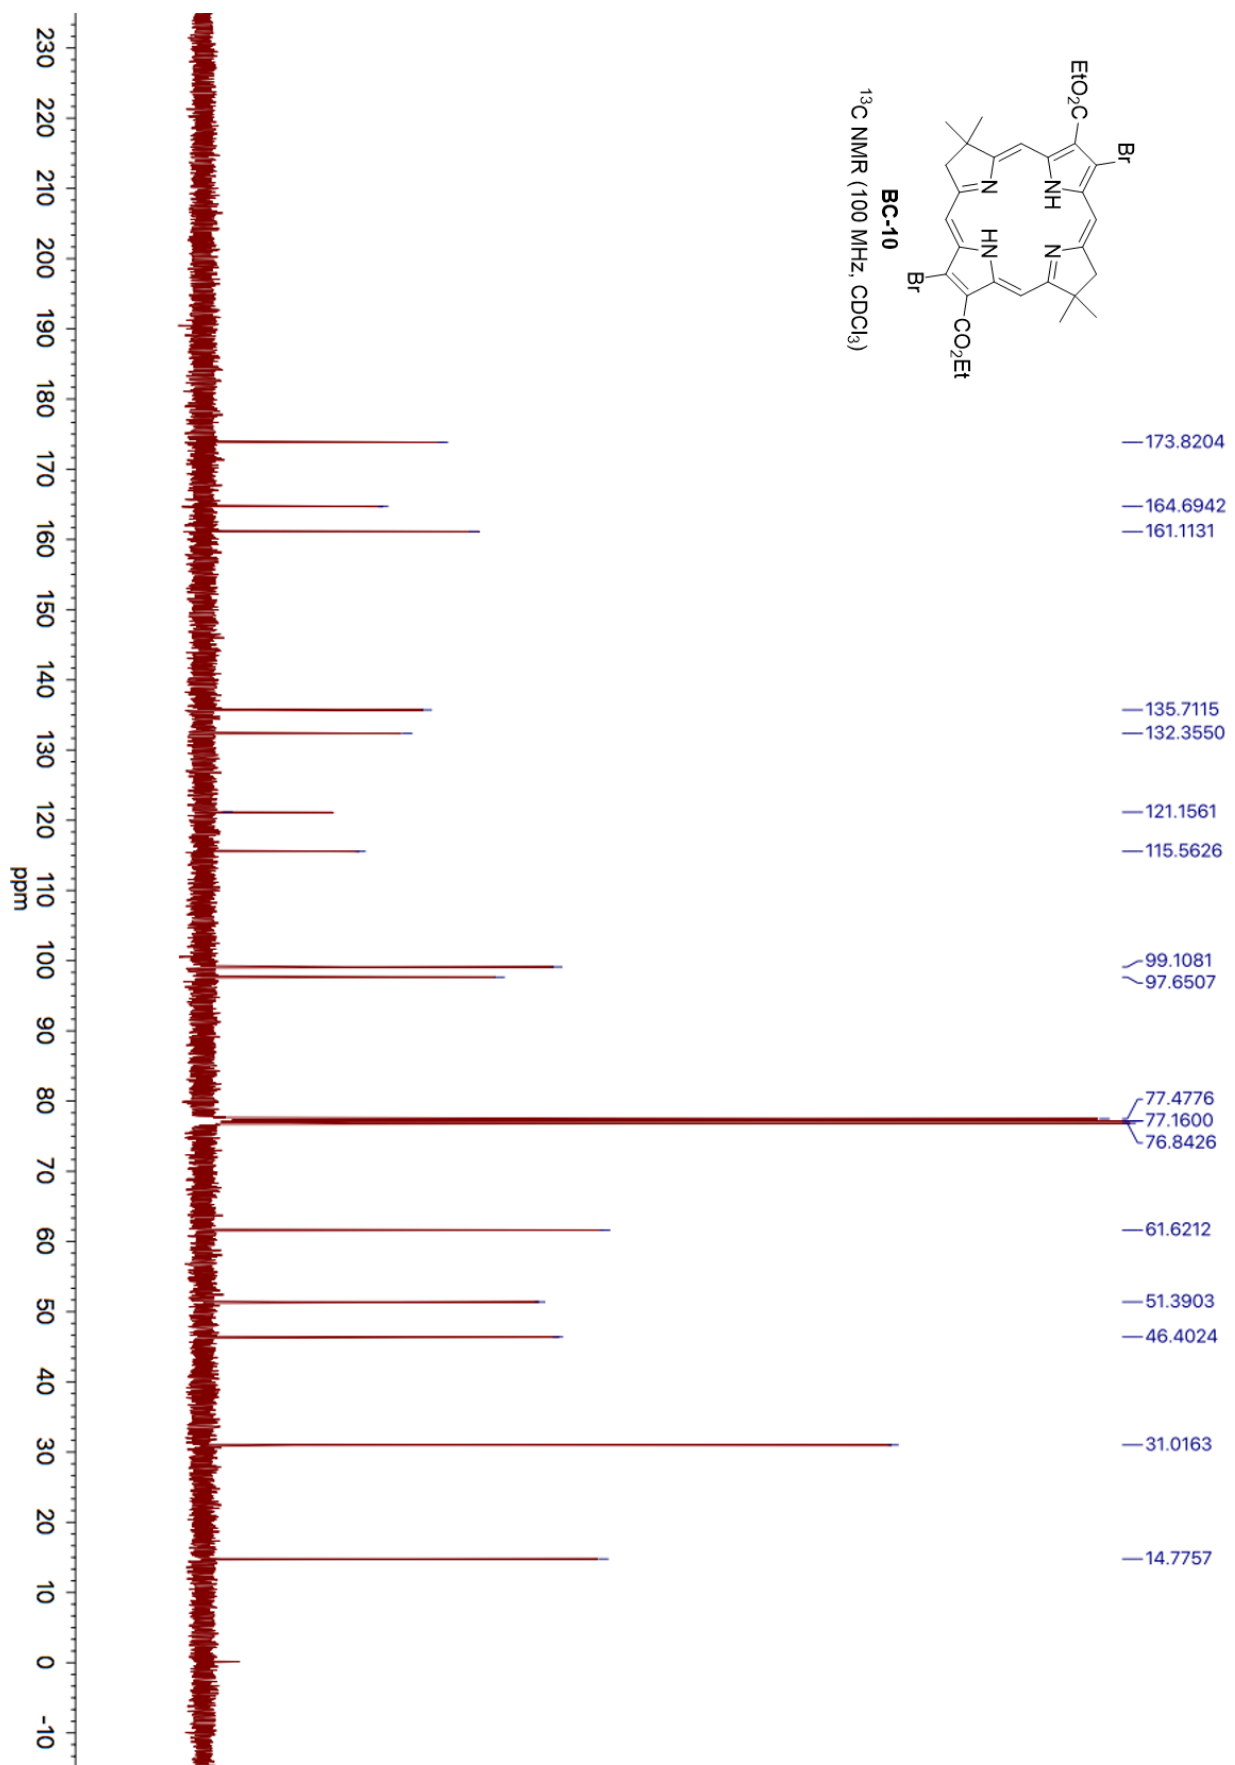

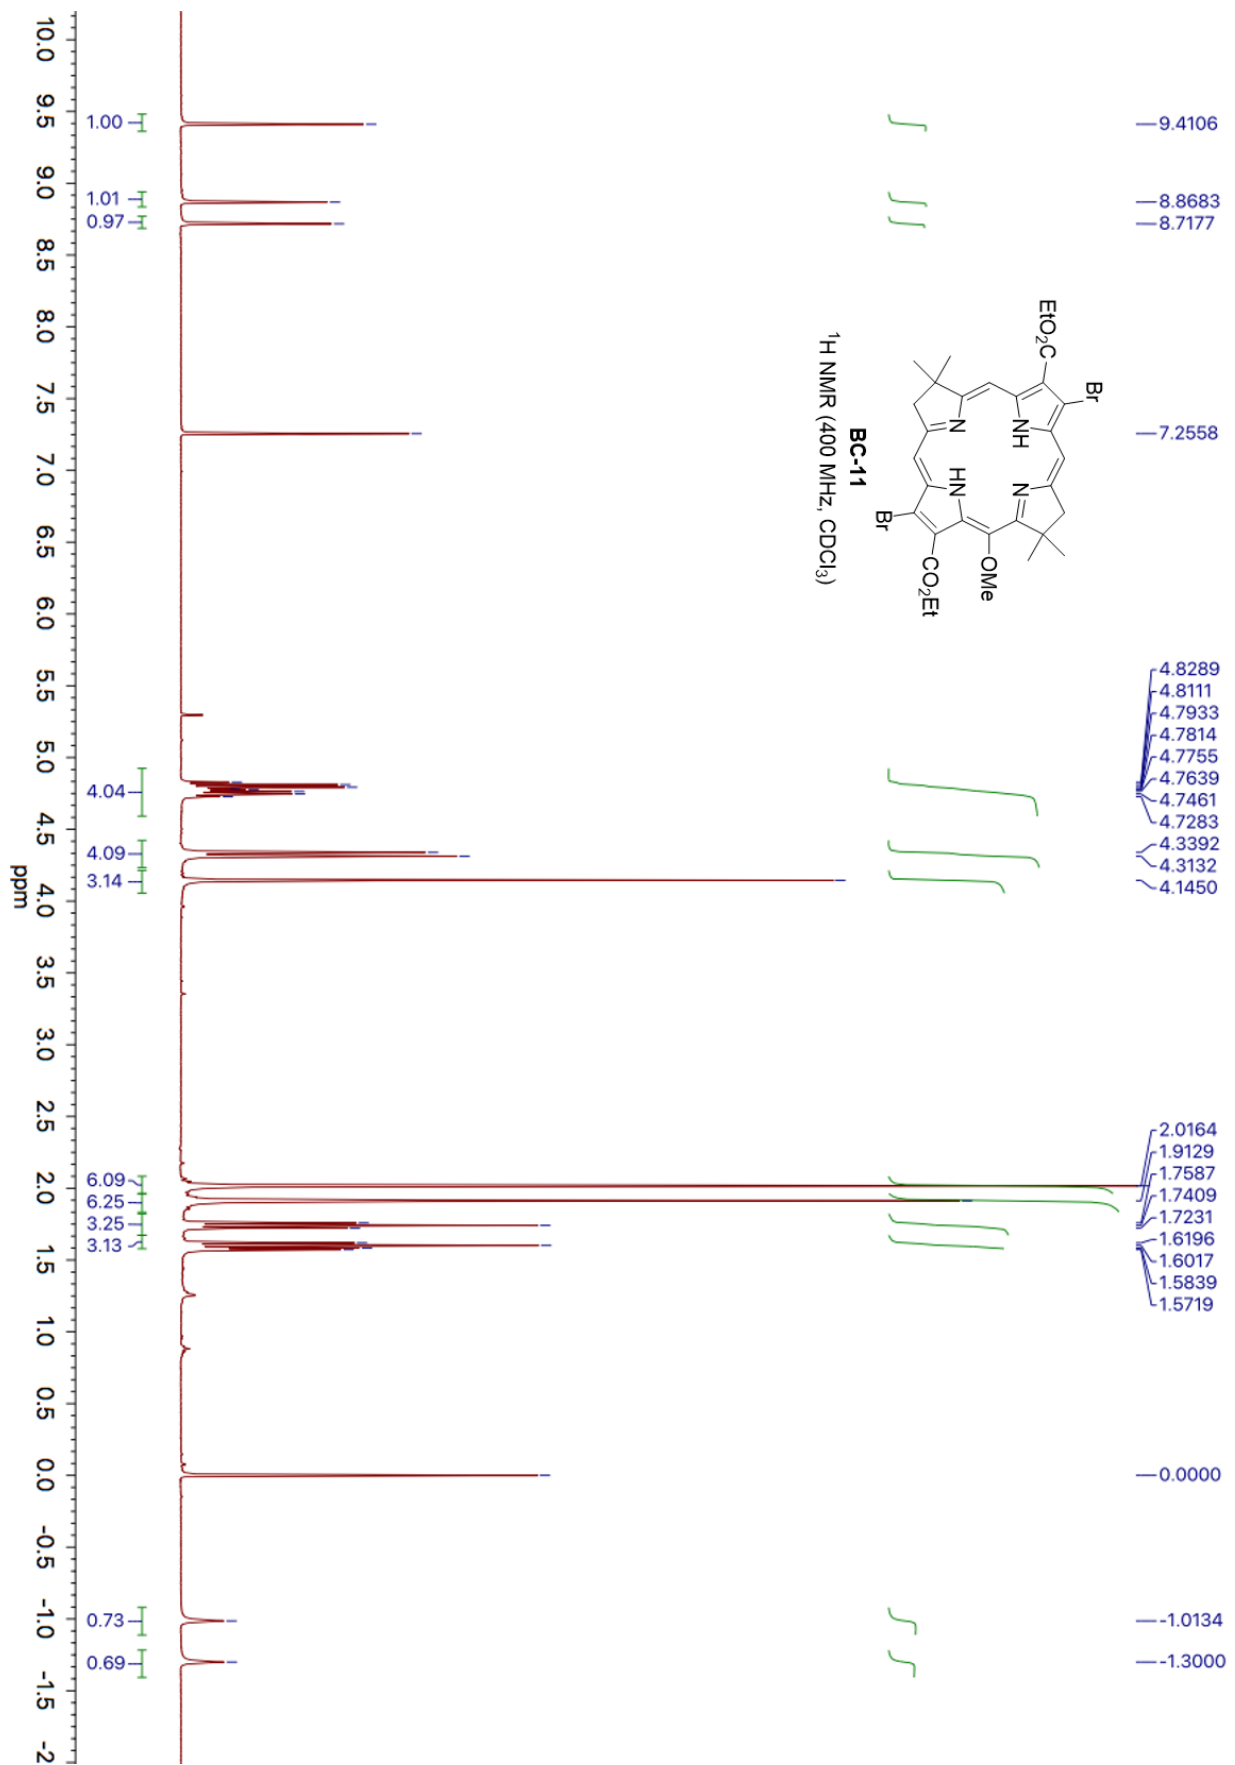

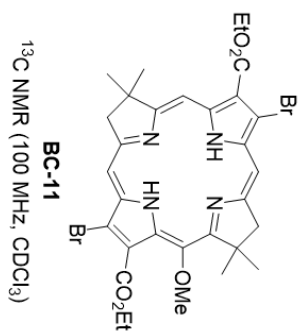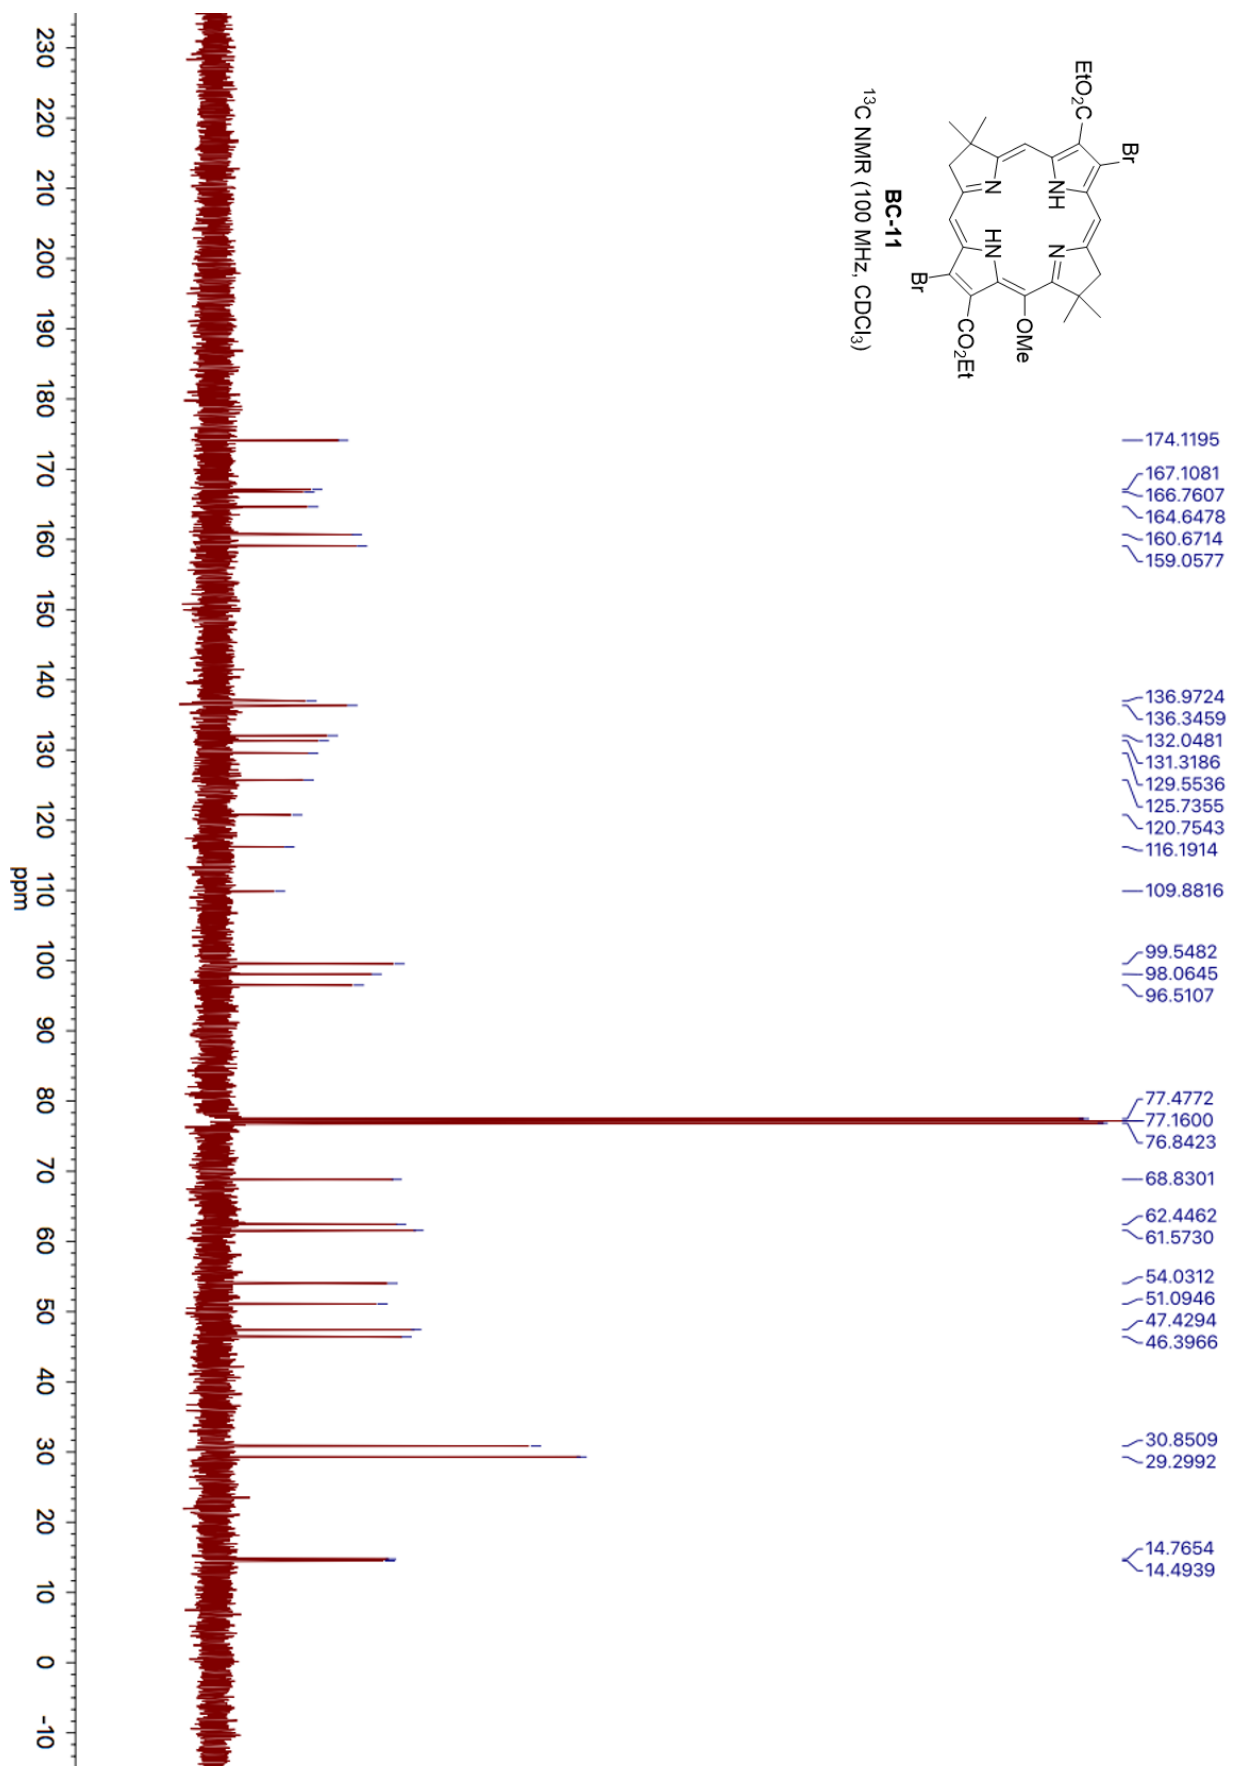

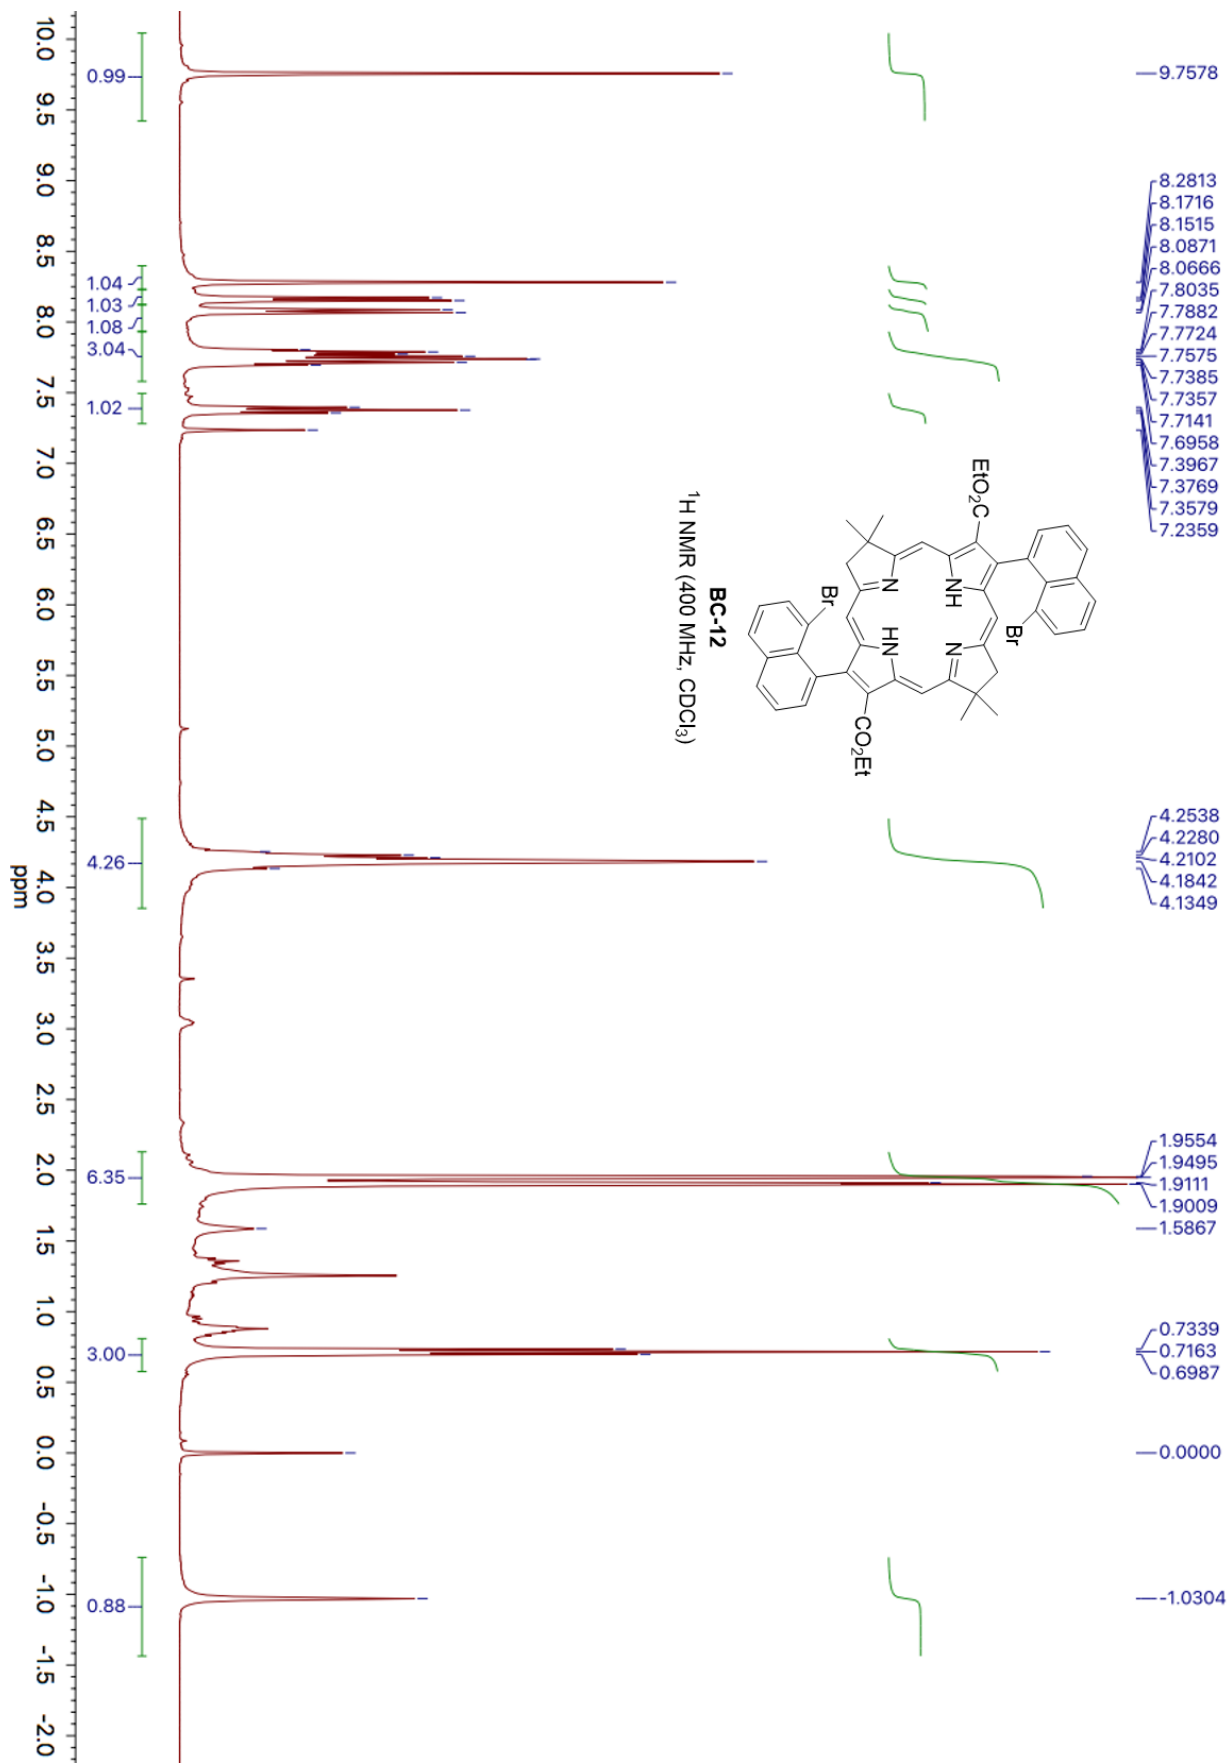

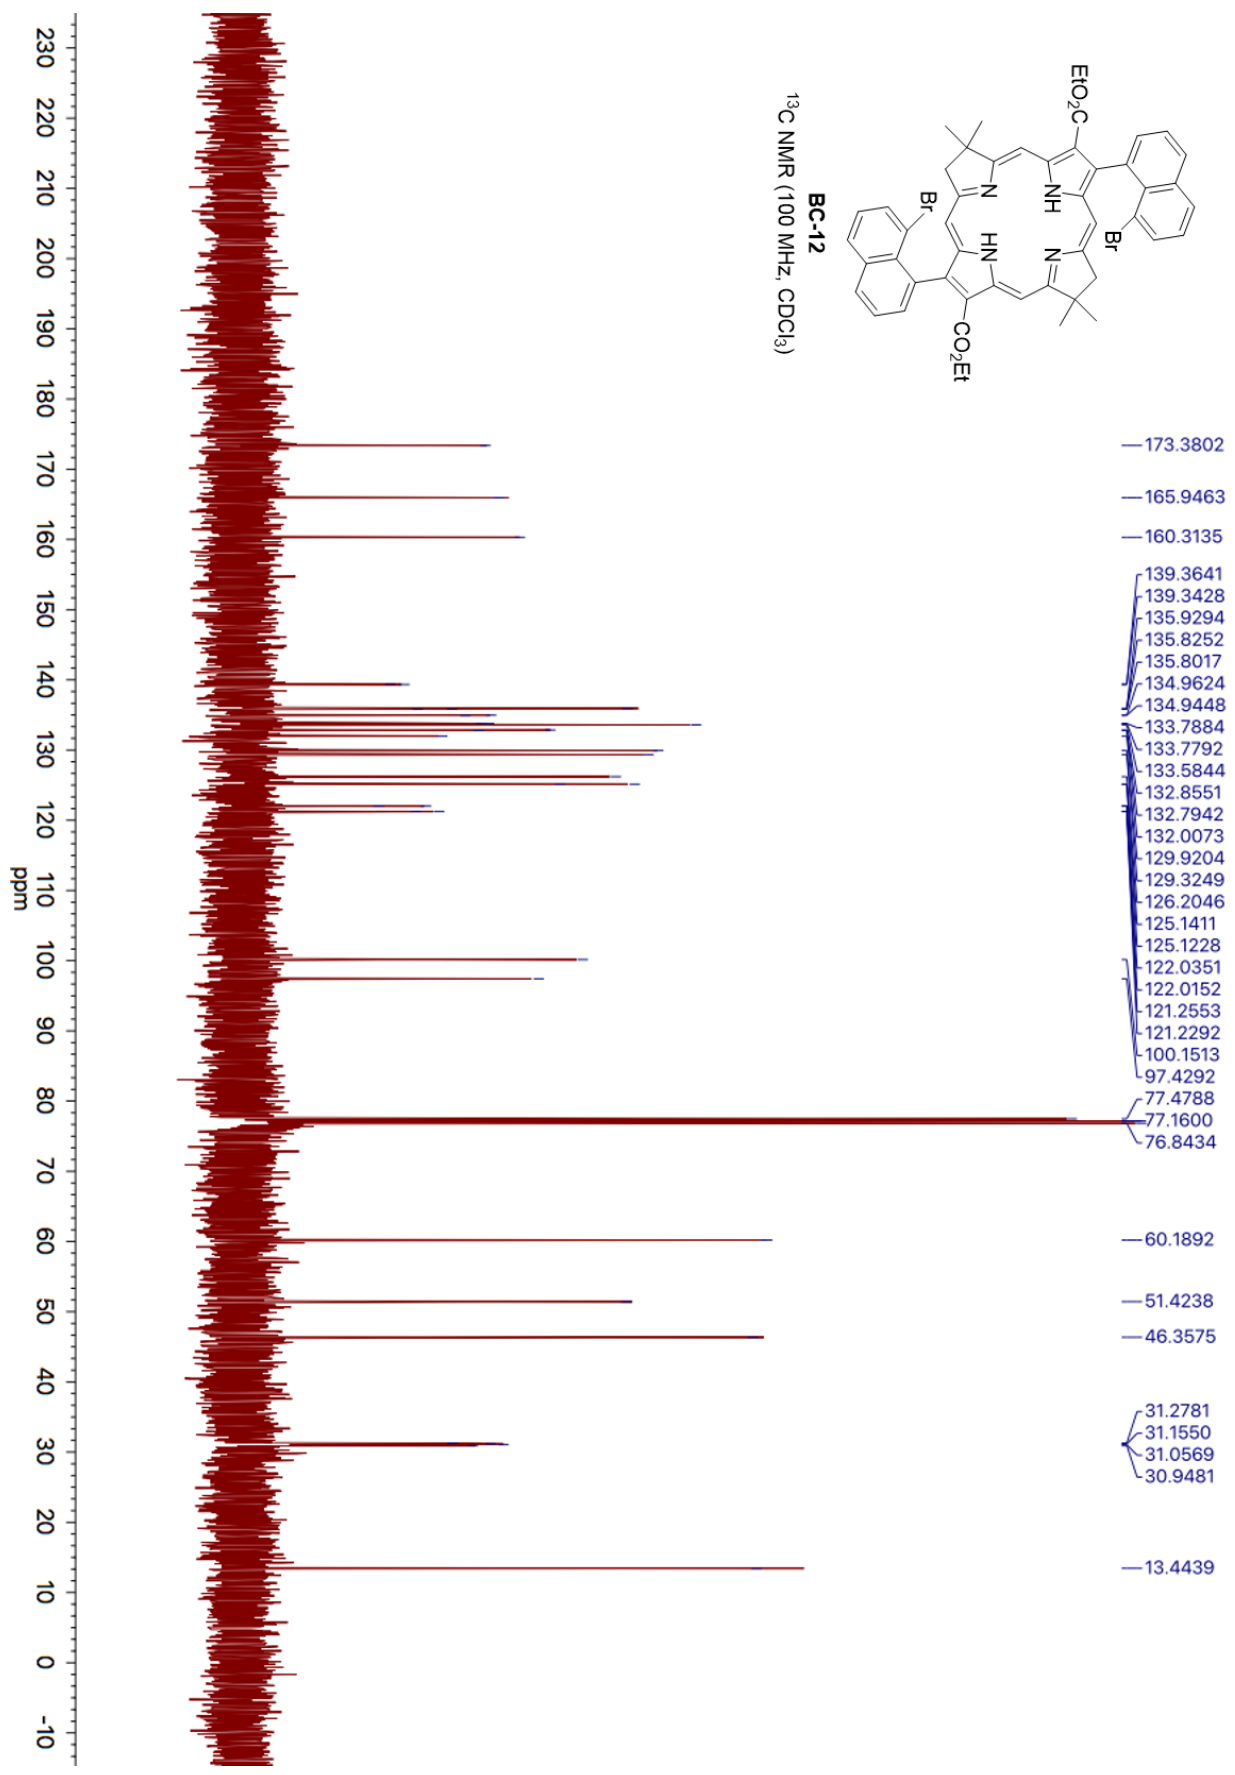



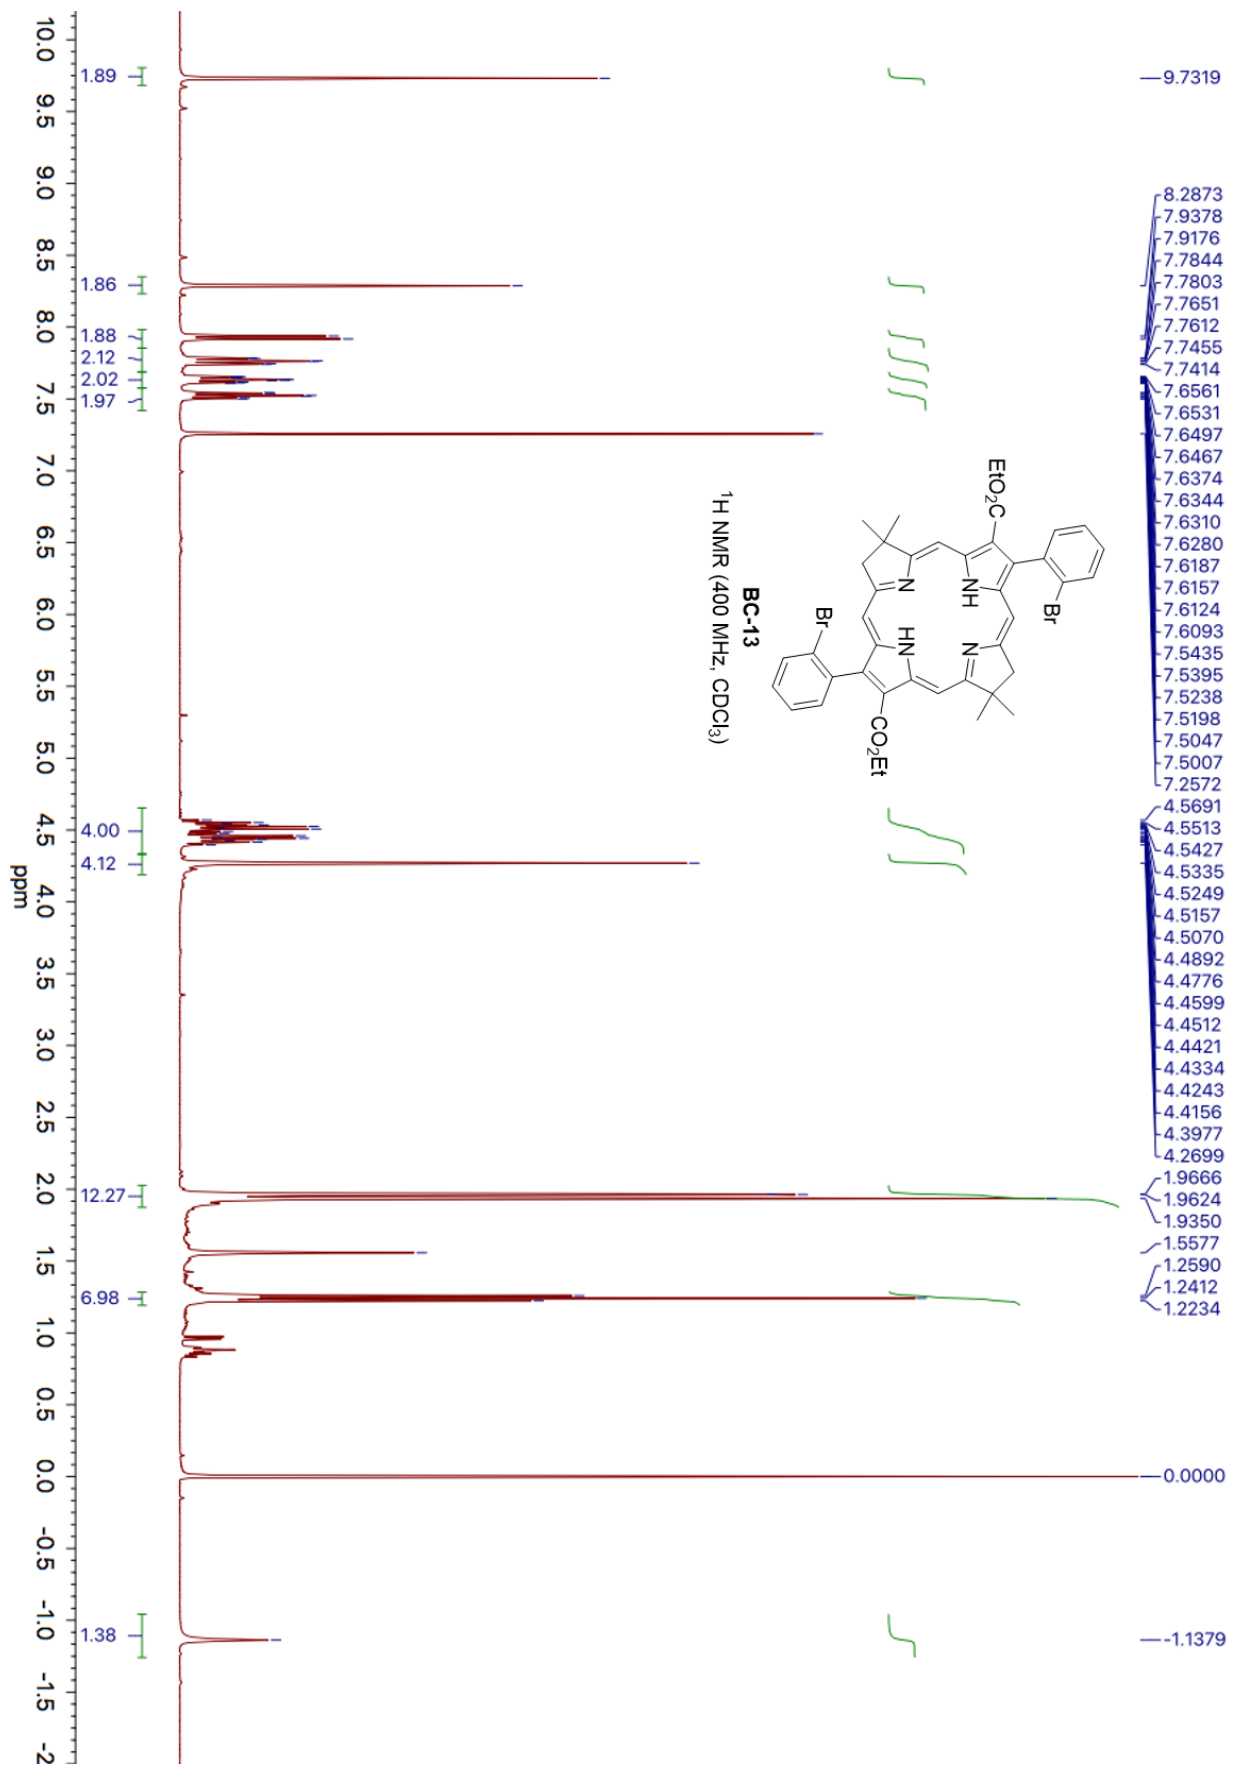

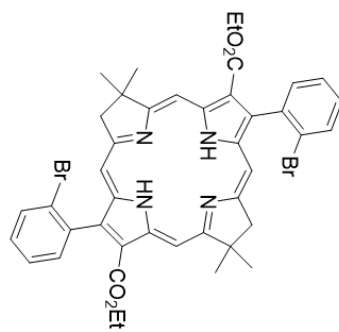

BC-13  
<sup>13</sup>C NMR (100 MHz, CDCl<sub>3</sub>)

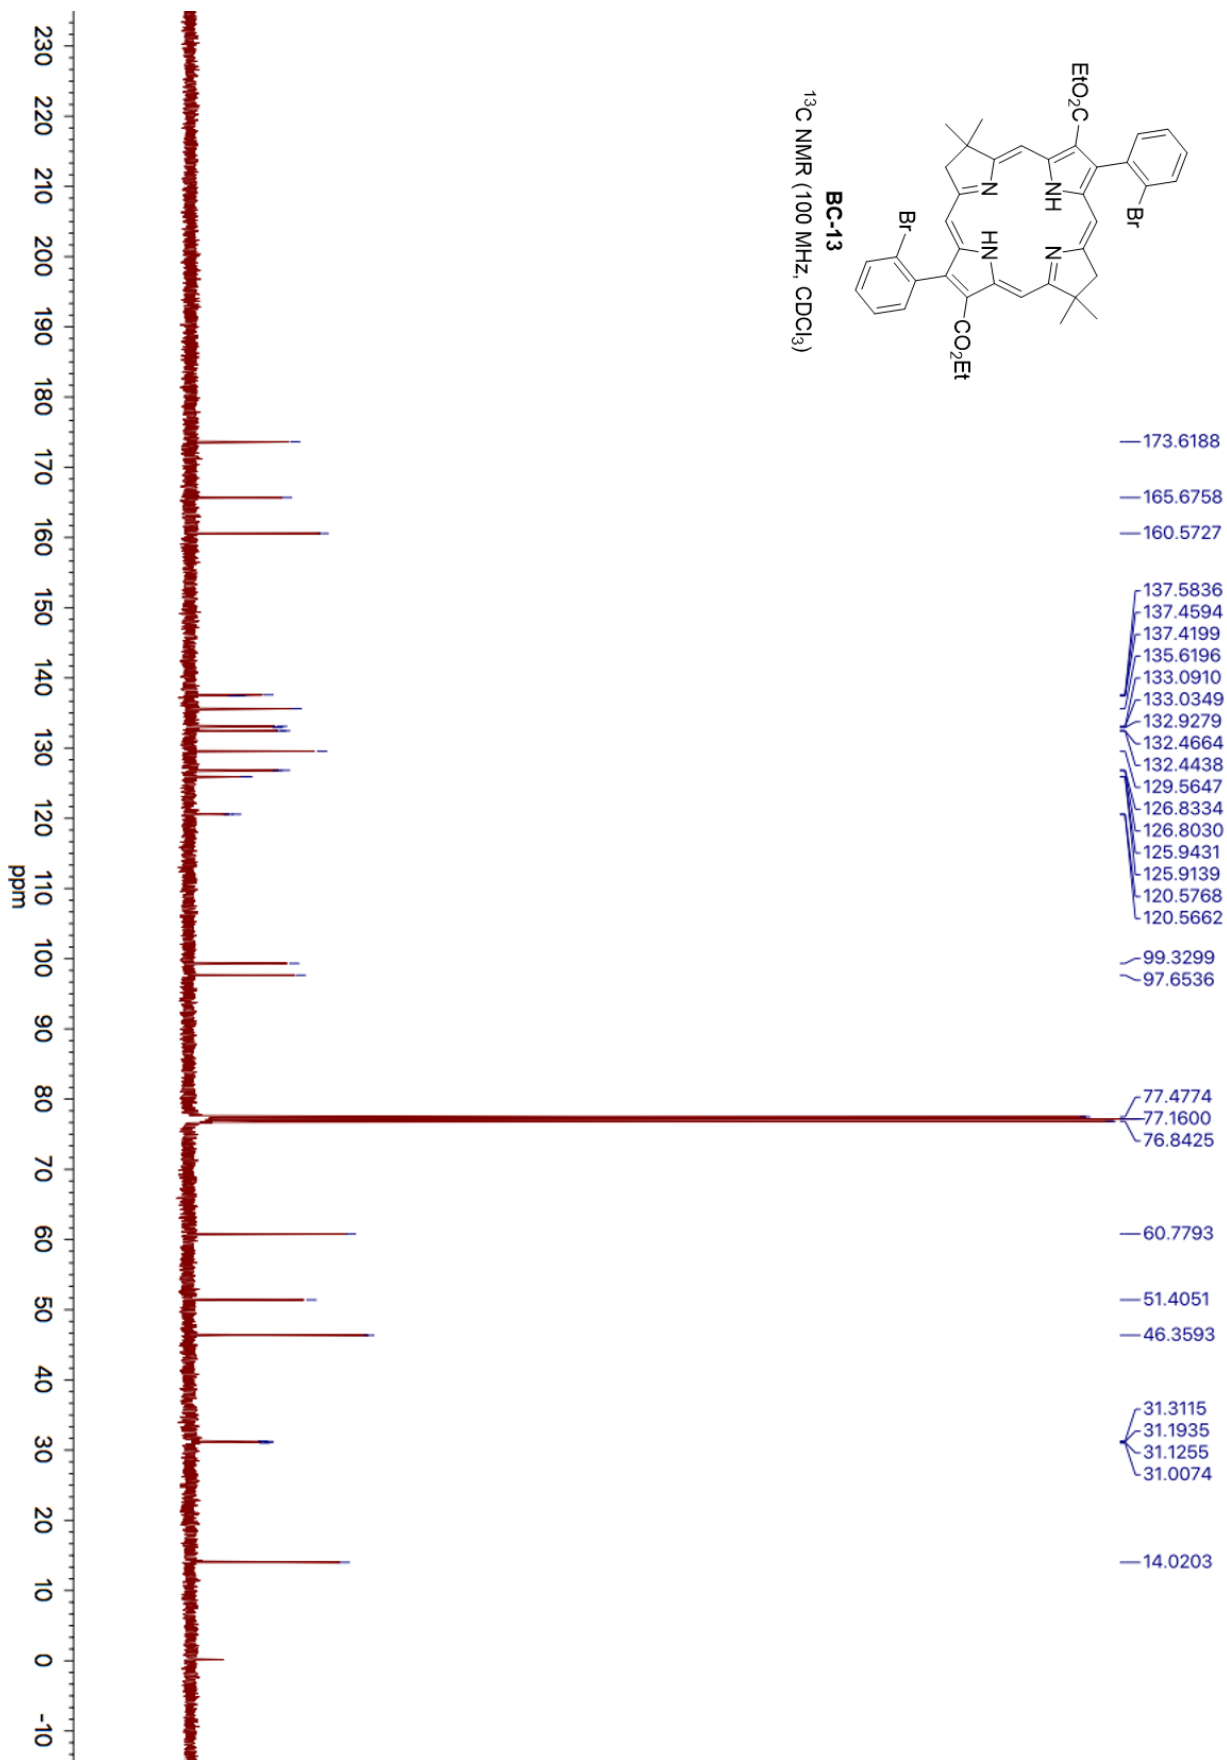

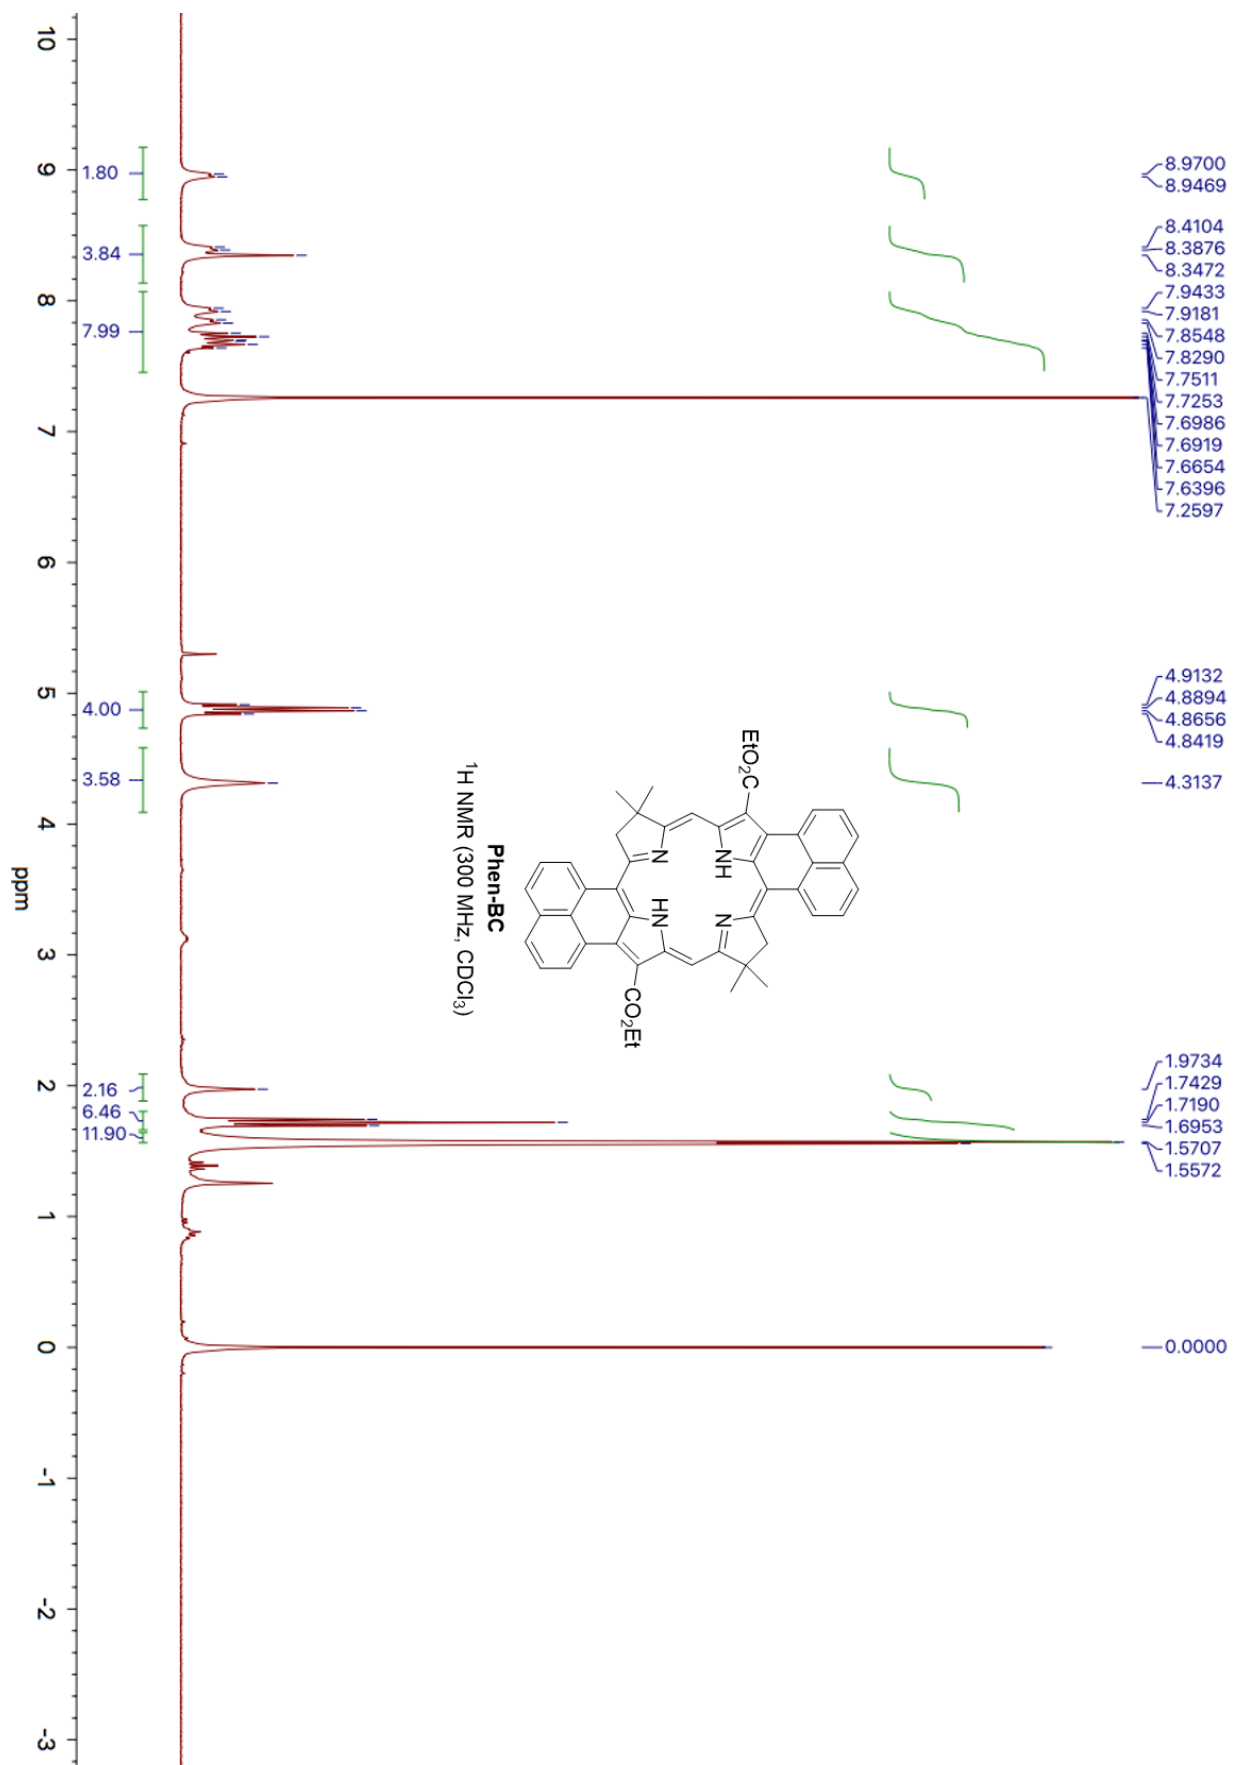

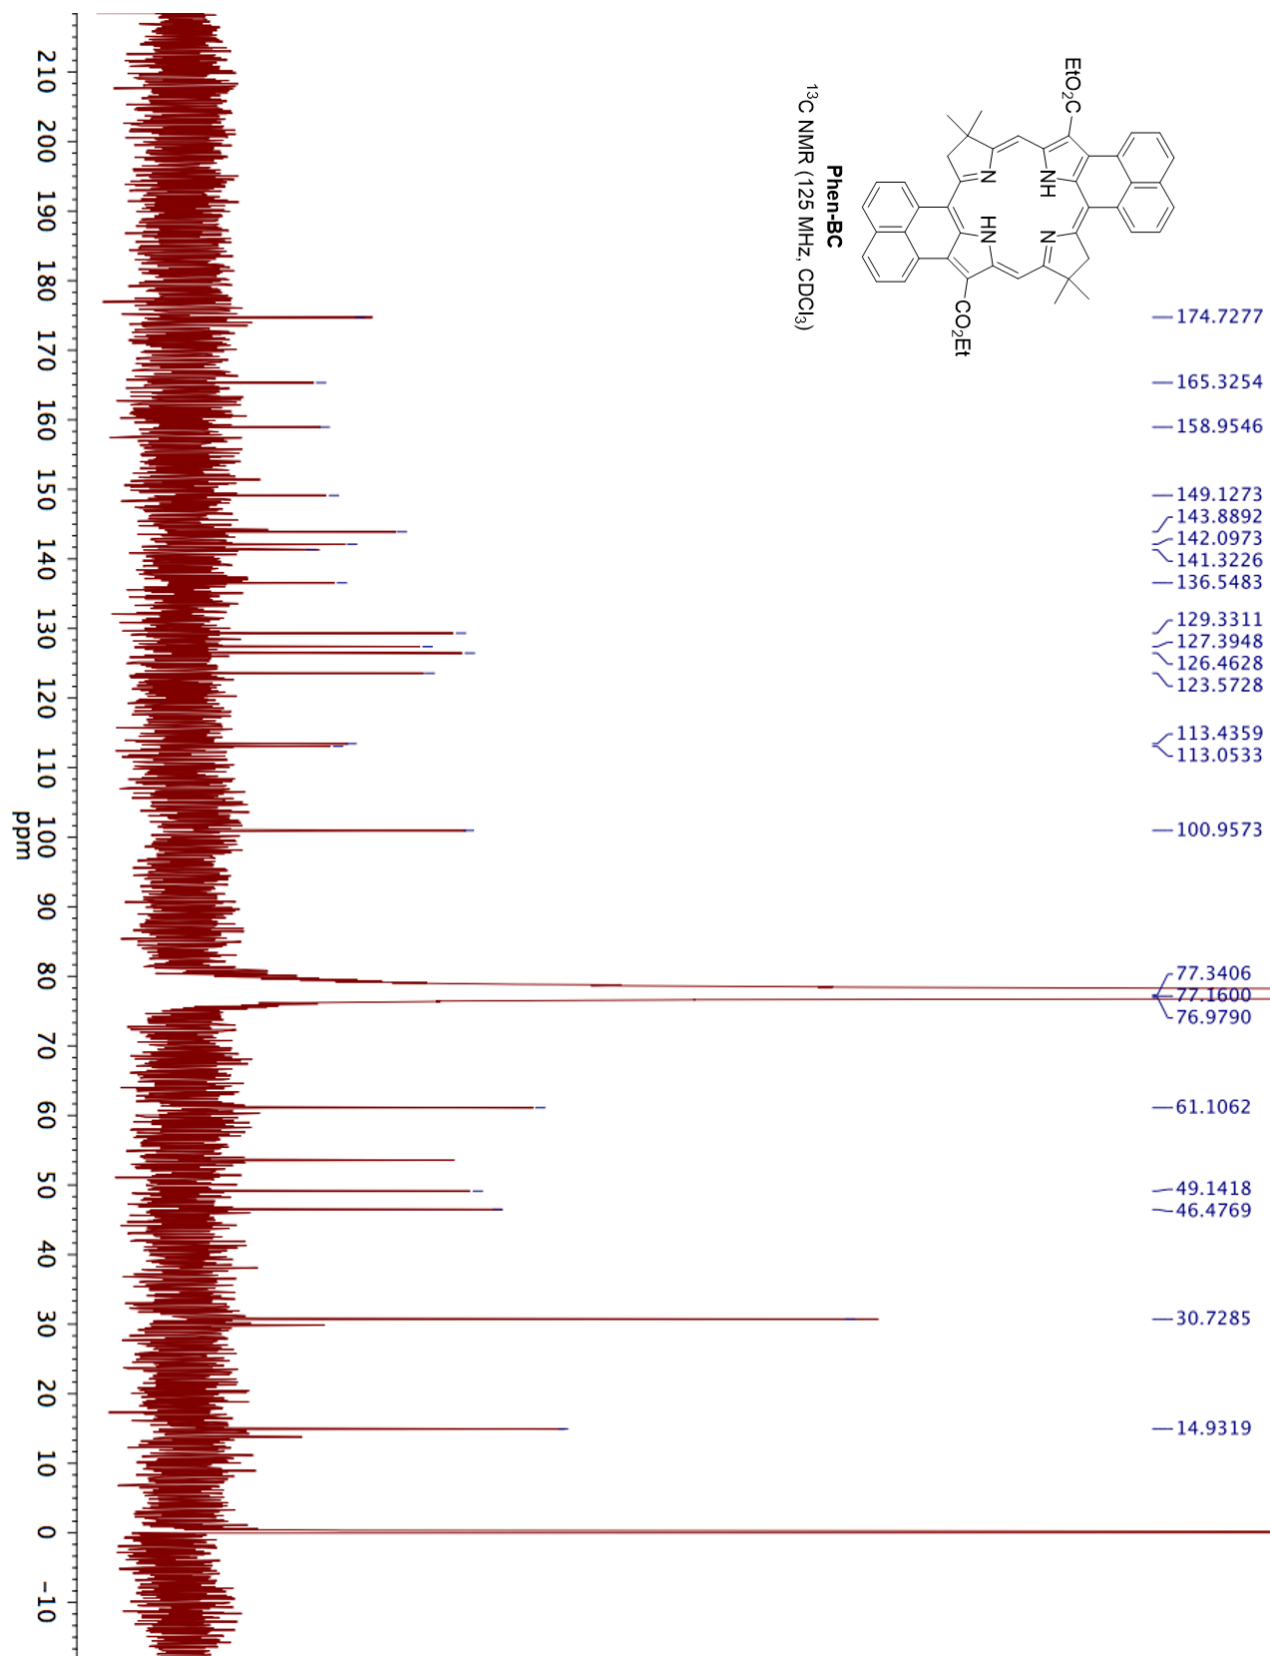

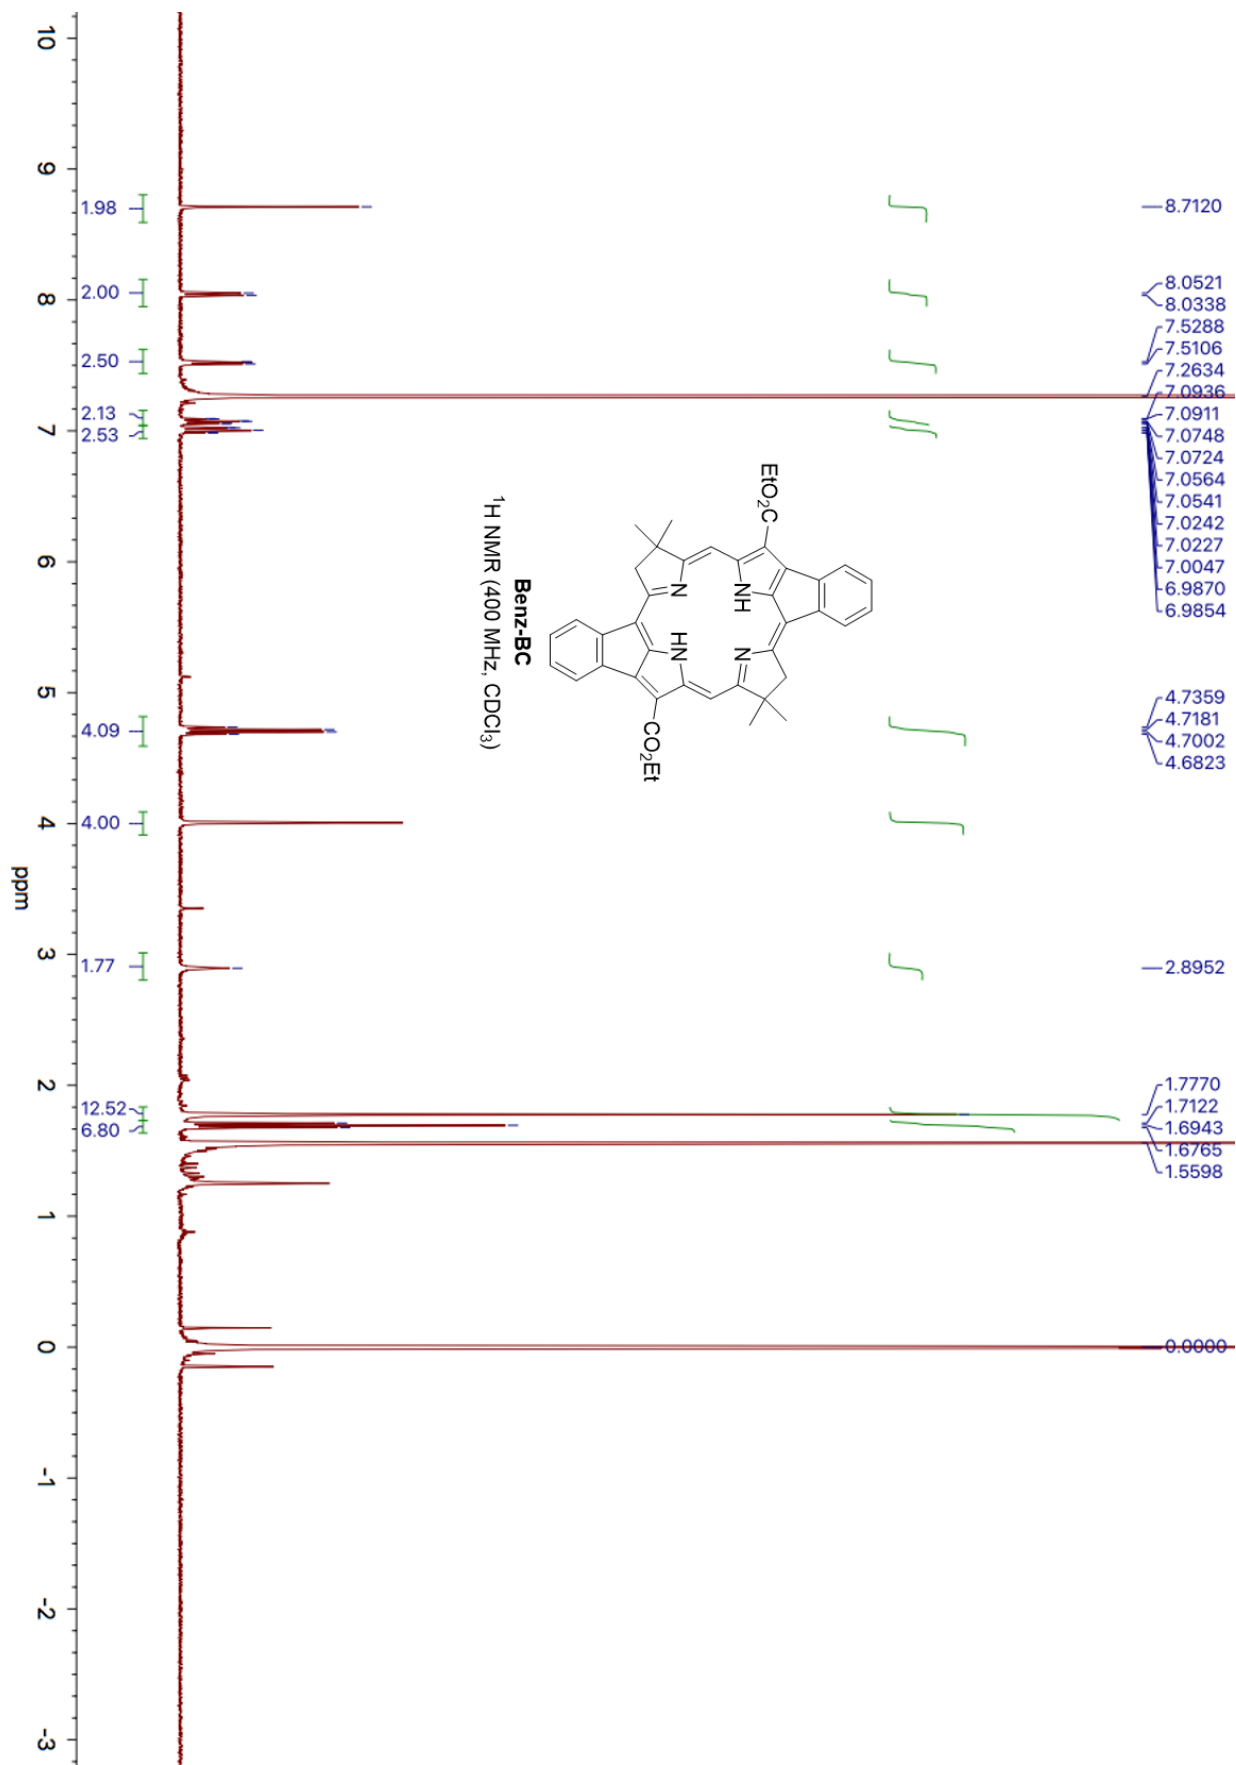

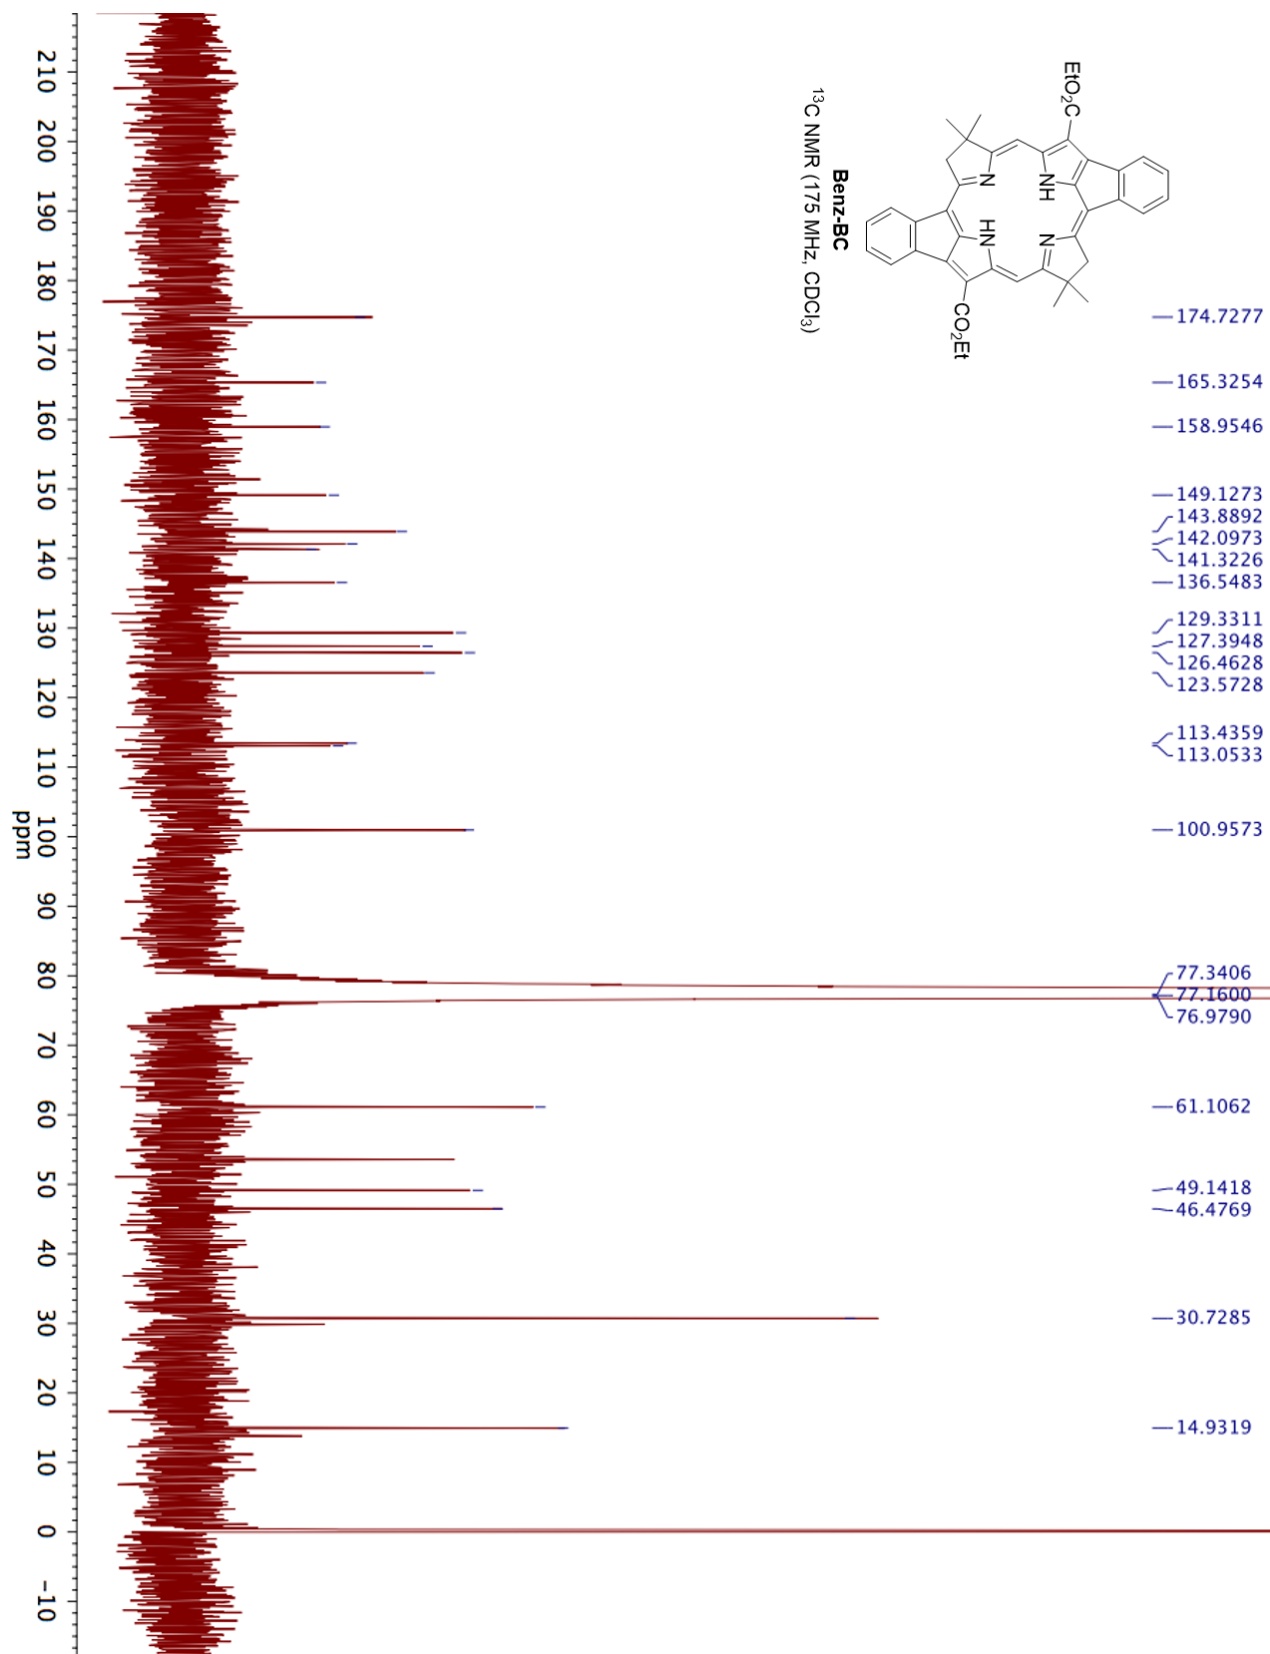

Supplement: c9nj01113g1.pdf [file c9nj01113g1.pdf]
